# Supplementary material for: Screening analysis of organic micro-pollutants in groundwater in Northern Vietnam: Occurrence, sources and risk assessment
Source: Research Square preprint supplement (doi:10.21203/rs.3.rs-7755411/v1), 2025-10-28
Supplement: Supplementary file 1 [file 1959cb75a2cacd43d332bd49.xlsx]

## Sheet: Supporting Information
Supporting Information
Screening analysis of organic micro-pollutants in groundwater in Northern Vietnam: Occurrence, sources and risk assessment
Dung Anh Truong a,b, Takashi Miyawaki a*, Hanh Thi Duong b, Ha Thu Trinh c, Takumi Gotoa, Nguyen Thi Thanh Hai b, Hidenari Yasui a.
a Faculty of Environmental Engineering, The University of Kitakyushu, 1-1 Hibikino, Wakamatsu, Kitakyushu, Fukuoka 808-0135, Japan.
b Institute of Science and Technology for Energy and Environment, Vietnam Academy of Science and Technology, 18 Hoang Quoc Viet Street, Nghia Do, Hanoi, Vietnam.
c Institute of Chemistry, Vietnam Academy of Science and Technology, 18 Hoang Quoc Viet Street, Nghia Do, Hanoi, Vietnam.
*Corresponding author. E-mail address: miyawaki@kitakyu-u.ac.jp
Contents
Table S1 Details on the sampling locations
Table S2 Chemicals analyzed by AIQS with GC-MS
Table S3 Chemicals analyzed by AIQS with LC-QTOFMS
Table S4 List of Internal standard
Table S5 GC-MS conditions
Table S6 LC-QTOF-MS conditions
Table S7 Recovery of standard samples of QC tests for AIQS with GC-MS and LC-QTOFMS
Table S8 Concentration of detected chemicals in blank samples (ng/L)
Table S9 Chronic daily intake (CDI) and risk quotient (RQ) of OMPs in groundwater in northen Vietnam
Fig. S1 Principal component analysis of 19 groundwater samples using measured concentrations of 21 OMPs (DF > 20%)

## Sheet: Table S1
Table S1 Details on the sampling locations
No.	Area	Name	Location	Depth of well (m)	Years of use	pH	TDS (ppm)
1	Suburban (HNsuburban)	G1	21°02'55.6"N 105°58'32.0"E	45	more than 10 years	6.7	618
2		G2	21°03'08.7"N 105°58'41.6"E	24	more than 10 years	6.7	160
6		G3	21°00'42.6"N 105°43'10.5"E	35	more than 10 years	6.7	541
3	Urban (HNurban)	G4	21°05'28.5"N 105°46'02.5"E	24	more than 10 years	7.5	179
4		G5	21°04'05.2"N 105°55'05.3"E	48	more than 10 years	7	446
5		G6	20°59'28.0"N 105°49'36.8"E	18	more than 10 years	6.7	330
7		G7	21°00'07.1"N 105°53'31.1"E	30	more than 10 years	7.2	362
8		G8	20°58'33.1"N 105°51'54.5"E	-	more than 10 years	6.5	529
9	Agriculture (HP/HY)	G9	20°46'15.5"N 106°13'59.8"E	60	more than 10 years	7.1	606
10		G10	20°47'34.0"N 106°13'06.7"E	60	more than 10 years	6	1131
11		G11	20°48'46.9"N 106°10'57.0"E	30	more than 10 years	6	995
12		G12	20°41'19.3"N 106°18'13.0"E	60	more than 10 years	6.7	242
13		G13	20°41'00.9"N 106°19'29.8"E	90	more than 10 years	6.6	261
14		G14	20°40'39.4"N 106°17'18.0"E	60	more than 10 years	6.4	569
15	Industrial (HY)	G15	20°57'22.7"N 105°59'34.6"E	40	more than 10 years	6.4	209
16		G16	20°52'39.1"N 106°05'53.9"E	32	more than 10 years	6	383
17		G17	20°54'56.2"N 106°08'58.8"E	-	more than 10 years	6	615
18		G18	20°55'11.9"N 106°05'06.4"E	-	more than 10 years	6.3	202
19		G19	20°53'17.2"N 106°02'14.5"E	32	more than 10 years	6.1	203
- : information not avaiable

## Sheet: Table S2
Table S2 Chemicals analyzed by AIQS with GC-MS
No.	Compounds Name	Formula	CAS RN	MW	RT, min	m/z (Quantitation ion)	IDL* (pg)	MDL** (ng/L)
1	2,3,4,6-Tetrachlorophenol	C6H2Cl4O	58-90-2	230	18.716	232	2	4
2	2,3,5,6-&2,3,4,5-Tetrachlorophenol	C6H2Cl4O	935-95-5&4901-51-3	230	18.579	232	20	40
3	2-Phenylphenol (OPP)	C12H10O	90-43-7	170	18.091	170	2	4
4	4-Bromophenol	C6H5BrO	106-41-2	172	14.285	172	5	10
5	Azaconazole	C12H11Cl2N3O2	60207-31-0	299	27.209	217	2	4
6	Azoxystrobin	C22H17N3O5	131860-33-8	403	35.482	344	10	20
7	Benalaxyl	C20H23NO3	71626-11-4	325	28.523	148	2	4
8	Bitertanol	C20H23N3O2	55179-31-2	337	32.112	170	2	4
9	Boscalid	C18H12Cl2N2O	188425-85-6	343.2	33.498	140	2	4
10	Bromuconazole-1	C13H12BrCl2N3O	116255-48-2	375	29.861	173	10	20
11	Bromuconazole-2	C13H12BrCl2N3O	116255-48-2	375	30.381	173	2	4
12	Bupirimate	C13H24N4O3S	41483-43-6	316	27.129	273	2	4
13	Captafol	C10H9Cl4NO2S	2425-06-1	347	29.367	79	10	20
14	Captan	C9H8Cl3NO2S	133-06-2	299	25.759	79	2	4
15	Carboxin	C12H13NO2S	5234-68-4	235	27.179	235	2	4
16	Chinomethionat	C10H6N2OS2	2439-01-2	234	26.133	206	2	4
17	Chloroneb	C8H8Cl2O2	2675-77-6	206	18.022	191	2	4
18	Chlorothalonil (TPN)	C8Cl4N2	1897-45-6	264	22.179	266	2	4
19	Cyflufenamid	C20H17F5N2O2	180409-60-3	412	27.384	91	2	4
20	Cyproconazole	C15H18ClN3O	113096-99-4	291	27.472	222	2	4
21	Cyprodinil	C14H15N3	121552-61-2	225	25.342	224	2	4
22	Dichlofluanid	C9H11Cl2FN2O2S2	1085-98-9	332	24.283	224	2	4
23	Dichlofluanid metabolite				20.267	200	2	4
24	Dichlone	C10H4Cl2O2	117-80-6	226	22.283	226	2	4
25	Diclobutrazol	C15H19Cl2N3O	75736-33-3	327	27.202	270	10	20
26	Diclocymet 1	C15H18Cl2N2O	139920-32-4	312	25.715	277	2	4
27	Diclocymet 2	C15H18Cl2N2O	139920-32-4	312	26.11	277	2	4
28	Diclomezine	C11H8Cl2N2O	62865-36-5	254	29.295	254	2	4
29	Dicloran	C6H4Cl2N2O2	99-30-9	206	21.227	206	2	4
30	Diethofencarb	C14H21NO4	87130-20-9	267	24.577	225	2	4
31	Difenoconazole 1	C19H17Cl2N3O3	119446-68-3	405	34.932	265	2	4
32	Difenoconazole 2	C19H17Cl2N3O3	119446-68-3	405	35.007	265	2	4
33	Dimethomorph E	C21H22ClNO4	110488-70-5	387	35.633	301	2	4
34	Dimethomorph Z	C21H22ClNO4	110488-70-5	387	36.012	301	2	4
35	Diniconazole	C15H17Cl2N3O2	83657-24-3	325	27.853	268	2	4
36	Ditalimfos	C12H14NO4PS	5131-24-8	299	26.47	130	2	4
37	Edifenphos	C14H15O2PS2	17109-49-8	310	28.656	173	10	20
38	Ethoxyquin	C14H19NO	91-53-2	217	21.363	202	2	4
39	Etridiazole (Echlomezol)	C5H5Cl3N2OS	2593-15-9	246	17.109	211	5	10
40	Famoxadone	C22H18N2O4	131807-57-3	374	35.715	330	200	400
41	Fenamidone	C17H17N3OS	161326-34-7	311	30.217	238	2	4
42	Fenarimol	C17H12Cl2N2O	60168-88-9	330	31.427	219	2	4
43	Fenbuconazole	C19H17ClN4	114369-43-6	336	32.833	198	2	4
44	Fenbuconazole lactone A	C19H17ClN4	114369-43-6	337	33.94	145	1	2
45	Fenbuconazole lactone B	C19H17ClN4	114369-43-6	337	33.552	256	1	2
46	Fenoxanil	C15H18Cl2N2O2	115852-48-7	328	27.52	293	2	4
47	Fenpropimorph	C20H33NO	67306-03-0	303	24.712	128	2	4
48	Ferimzone	C15H18N4	89269-64-7	254	25.958	239	2	4
49	Fluazinam	C13H4Cl2F6N4O4	79622-59-6	464	25.246	372	2	4
50	Fludioxonil	C12H6F2N2O2	131341-86-1	248	26.713	248	2	4
51	Fluquinconazole	C16H8Cl2FN5O	136426-54-5	375	32.347	340	2	4
52	Flusilazole	C16H15F2N3Si	85509-19-9	315	27.102	233	2	4
53	Flusilazole metabolite				20.356	235	2	4
54	Flusulfamide	C13H7Cl2F3N2O4S	106917-52-6	414	30.126	179	4	8
55	Flutolanil	C17H16F3NO2	66332-96-5	323	26.674	173	2	4
56	Flutriafol	C16H13F2N3O	76674-21-0	301	26.548	219	2	4
57	Folpet	C9H4Cl3NO2S	133-07-3	295	25.877	260	4	8
58	Fthalide	C8H2Cl4O2	27355-22-2	270	24.905	243	2	4
59	Furametpyr	C17H20ClN3O2	123572-88-3	333	30.484	157	2	4
60	Furametpyr metabolite				31.072	296	10	20
61	Hexachlorobenzene	C6Cl6	118-74-1	282	20.951	284	2	4
62	Hexaconazole	C14H17Cl2N3O	79983-71-4	313	26.731	214	2	4
63	Hymexazol	C4H5NO2	10004-44-1	99	8.685	99	2	4
64	Imazalil	C14H14Cl2N2O	35554-44-0	296	26.71	215	2	4
65	Imibenconazole	C17H13Cl3N4S	86598-92-7	410	36.374	125	2	4
66	Iprobenfos (IBP)	C13H21O3PS	26087-47-8	288	22.784	204	2	4
67	Iprodione	C13H13Cl2N3O3	36734-19-7	329	29.755	314	2	4
68	Iprodione metabolite				30.581	142	10	20
69	Isoprothiolane	C12H18O4S2	50512-35-1	290	26.794	118	2	4
70	Kresoxim methyl	C18H19NO4	143390-89-0	313	27.166	116	2	4
71	Mefenoxam	C15H21NO4	70630-17-0	279	23.683	206	2	4
72	Mepanipyrim	C14H13N3	110235-47-7	223	26.468	222	2	4
73	Mepronil	C17H19NO2	55814-41-0	269	28.288	119	2	4
74	Metalaxyl	C15H21NO4	57837-19-1	279	23.69	206	2	4
75	Metominostrobin E	C16H16N2O3	133408-50-1	284	26.726	191	2	4
76	Metominostrobin Z	C16H16N2O3	133408-50-1	284	27.203	191	2	4
77	Myclobutanil	C15H17ClN4	88671-89-0	288	27.053	179	2	4
78	Napropamide	C17H21NO2	15299-99-7	271	26.612	128	2	4
79	Nitrothal-isopropyl	C14H17NO6	10552-74-6	295	24.901	236	2	4
80	Orysastrobin	C18H25N5O5	248583-16-1	391.4	30.597	116	2	4
81	Oxadixyl	C14H18N2O4	77732-09-3	278	27.91	163	2	4
82	Oxpoconazole-formyl	C17H23ClN2O3	154-02371	338	23.386	114	2	4
83	Oxpoconazole-fumalate	C23H28ClN3O6	174212-12-5	478	32.455	294	100	200
84	Penconazole	C13H15Cl2N3	66246-88-6	283	25.471	248	2	4
85	Pencycuron	C19H21ClN2O	66063-05-6	328	20.717	125	2	4
86	Pentachloronitrobenzene (Quintozene)	C6Cl5NO2	82-68-8	293	21.609	237	2	4
87	Prochloraz	C15H16Cl3N3O2	67747-09-5	375	32.406	180	2	4
88	Procymidone	C13H11Cl2NO2	32809-16-8	283	25.786	283	2	4
89	Propamocarb	C9H20N2O2	25606-41-1	188	16.209	58	2	4
90	Propiconazole 1	C15H17Cl2N3O2	60207-90-1	341	28.672	259	2	4
91	Propiconazole 2	C15H17Cl2N3O2	60207-90-1	341	28.812	259	2	4
92	Pyraclostrobin	C19H18ClN3O4	175013-18-0	388	34.491	132	100	200
93	Pyrazophos	C14H20N3O5PS	13457-18-6	373	31.416	221	2	4
94	Pyrifenox E	C14H12Cl2N2O	88283-41-4	294	26.184	262	2	4
95	Pyrifenox Z	C14H12Cl2N2O	88283-41-4	294	25.555	262	2	4
96	Pyrimethanil	C12H13N3	53112-28-0	199	22.212	198	2	4
97	Pyroquilon	C11H11NO	57369-32-1	173	22.068	130	2	4
98	Quinoxyfen	C15H8Cl2FNO	124495-18-7	307	28.699	237	2	4
99	Simeconazole	C14H20FN3OSi	149508-90-7	293	23.501	121	2	4
100	Spiroxamine 1	C18H35NO2	118134-30-8	297	23.505	100	2	4
101	Spiroxamine 2	C18H35NO2	118134-30-8	297	24.162	100	2	4
102	TCMTB	C9H6N2S3	21564-17-0	238	26.647	180	4	8
103	Tebuconazole	C16H22ClN3O	107534-96-3	307	29.167	250	2	4
104	Tecnazene	C6HCl4NO2	117-18-0	259	19.277	261	2	4
105	Tetraconazole	C13H11Cl2F4N3O	112281-77-3	371	24.781	336	10	20
106	Thiabendazole	C10H7N3S	148-79-8	201	25.717	201	2	4
107	Thifluzamide	C13H6Br2F6N2O2S	130000-40-7	526	26.992	194	2	4
108	Tolclofos-methyl	C9H11Cl2O3PS	57018-04-9	301	23.492	265	2	4
109	Tolylfluanid	C10H13Cl2FN2O2S2	731-27-1	346	25.531	238	2	4
110	Tolylfluanid metabolite				21.764	214	10	20
111	Triadimefon	C14H16ClN3O2	43121-43-3	293	24.782	208	2	4
112	Triadimenol 1	C14H18ClN3O2	89482-17-7	295	25.811	168	2	4
113	Triadimenol 2	C14H18ClN3O2	82200-72-4	295	25.997	168	2	4
114	Trichlamid	C13H16Cl3NO3	70193-21-4	339	26.247	148	2	4
115	Tricyclazole	C9H7N3S	41814-78-2	189	26.798	189	2	4
116	Tridemorph	C19H39NO	81412-43-3	297	22.81	153	2	4
117	Trifloxystrobin	C20H19F3N2O4	141517-21-7	408	28.633	116	2	4
118	4-Chloro-3-methylphenol	C7H7ClO	59-50-7	142	14.35	142	5	10
119	2,6-Dichlorobenzamid	C7H5Cl2NO	2008-58-4	190	20.338	173	2	4
120	Acetochlor	C14H20ClNO2	34256-82-1	269	23.272	223	2	4
121	Alachlor	C14H20ClNO2	15972-60-8	269	23.502	188	2	4
122	Allidochlor	C8H12ClNO	93-71-0	173	14.318	138	2	4
123	Ametryn	C9H17N5S	834-12-8	227	23.706	227	2	4
124	Amino-chlornitrofen	C12H8Cl3NO	26306-61-6	287	27.164	289	2	4
125	Anilofos	C13H19ClNO3PS2	64249-01-0	367	30.35	226	2	4
126	Atrazine	C8H14ClN5	1912-24-9	215	21.581	200	2	4
127	Benfluralin	C13H16F3N3O4	1861-40-1	335	20.474	292	5	10
128	Benfuresate	C12H16O4S	68505-69-1	256	23.132	163	2	4
129	Benoxacor	C11H11Cl2NO2	98730-04-2	259	22.857	120	2	4
130	Bensulide	C14H24NO4PS3	741-58-2	397	23.853	77	2	4
131	Bentazone	C10H12N2O3S	25057-89-0	240	24.975	198	2	4
132	Bifenox	C14H9Cl2NO5	42576-02-3	340	30.366	341	2	4
133	Bromacil	C9H13BrN2O2	314-40-9	260	24.186	205	2	4
134	Bromobutide	C15H22BrNO	74712-19-9	311	23.315	119	2	4
135	Butachlor	C17H26ClNO2	23184-66-9	311	26.3	176	2	4
136	Butafenacil	C20H18ClF3N2O6	134605-64-4	475	32.573	331	10	20
137	Butamifos	C13H21N2O4PS	36335-67-8	332	26.488	286	20	40
138	Butylate	C11H23NOS	2008-41-5	217	16.797	146	2	4
139	Cafenstrole	C16H22N4O3S	125306-83-4	350	32.742	100	2	4
140	Carbetamide	C12H16N2O3	16118-49-3	236	24.816	119	10	20
141	Carfentrazone-ethyl	C15H14Cl2F3N3O3	128639-02-1	411	28.504	312	2	4
142	Chloridazon	C10H8ClN3O	1698-60-8	221	28.785	221	20	40
143	Chlorimuron-ethyl	C15H15ClN4O6S	99283-00-8	414	15.354	159	2	4
144	Chlornitrofen (CNP)	C12H6Cl3NO3	1836-77-7	317	28.524	317	5	10
145	Chlorpropham	C10H12ClNO2	101-21-3	213	20.296	213	2	4
146	Chlorsulfuron	C12H12ClN5O4S	64902-72-3	357	14.622	140	2	4
147	Chlorthal-dimethyl	C10H6Cl4O4	1861-32-1	330	24.612	301	2	4
148	Cinmethylin	C18H26O2	87818-31-3	274	23.777	105	2	4
149	Clomazone	C12H14ClNO2	81777-89-1	239	21.669	204	2	4
150	Clomeprop	C16H15Cl2NO2	84496-56-0	324	30.48	288	2	4
151	Cyanazine	C9H13ClN6	21725-46-2	240	24.628	225	2	4
152	Cycloate	C11H21NOS	1134-23-2	215	20.01	154	2	4
153	Cyhalofop Butyl	C20H20FNO4	122008-85-9	357	31.048	256	2	4
154	Desmedipham	C16H16N2O4	13684-56-5	300	21.173	181	100	200
155	Dichlobenil	C7H3Cl2N	1194-65-6	171	15.27	171	2	4
156	Diclofop-methyl	C16H14Cl2O4	51338-27-3	340	29.202	340	2	4
157	Diclosulam	C13H10Cl2FN5O3S	145701-21-9	405	35.294	342	2	4
158	Difenzoquat metilsulfate	C18H20N2O4S	43222-48-6	360	27.153	234	4	8
159	Diflufenican	C19H11F5N2O2	83164-33-4	394	29.232	266	2	4
160	Dimepiperate	C15H21NOS	61432-55-1	263	25.845	119	2	4
161	Dimethametryn	C11H21N5S	22936-75-0	255	25.49	212	2	4
162	Dimethenamid	C12H18ClNO2S	87674-68-8	275	23.169	154	2	4
163	Dimethipin	C6H10O4S2	55290-64-7	210	21.579	54	2	4
164	Diphenamid	C16H17NO	957-51-7	239	25.064	167	2	4
165	Dithiopyr	C15H16F5NO2S2	97886-45-8	401	23.845	286	2	4
166	EPTC	C9H19NOS	759-94-4	189	15.601	128	2	4
167	Esprocarb	C15H23NOS	85785-20-2	265	24.328	222	2	4
168	Ethalfluralin	C13H14F3N3O4	55283-68-6	333	20.16	316	2	4
169	Ethofumesate	C13H18O5S	26225-79-6	286	24.174	286	2	4
170	Etobenzanid	C16H15Cl2NO3	79540-50-4	339	32.737	179	2	4
171	Fenoxaprop-ethyl	C18H16ClNO5	66441-23-4	361	31.872	288	2	4
172	Flamprop-methyl	C17H15ClFNO3	52756-25-9	335	27.019	105	2	4
173	Flumiclorac-pentyl	C21H23ClFNO5	87546-18-7	423	35.465	423	2	4
174	Flumioxazin	C19H15FN2O4	103361-09-7	354	34.334	354	2	4
175	Fluridone	C19H14F3NO	59756-60-4	329	33.901	328	2	4
176	Fluthiacet-methyl	C15H15ClFN3O3S2	117337-19-6	403	36.831	403	2	4
177	Furilazole	C11H13Cl2NO3	121776-33-8	277	21.408	220	2	4
178	Hexazinone	C12H20N4O2	51235-04-2	252	28.947	171	2	4
179	Imazamethabenz-methyl	C16H20N2O3	81405-85-8	288	27.171	256	2	4
180	Indanofan	C20H17ClO3	133220-30-1	340	30.334	174	2	4
181	Isopropalin	C15H23N3O4	33820-53-0	309	25.177	280	2	4
182	Isoxadifen-ethyl	C18H17NO3	163520-33-0	295	28.488	182	4	8
183	Lenacil	C13H18N2O2	2164-08-1	234	28.752	153	2	4
184	MCPA-thioethyl (Phenothiol)	C11H13ClO2S	25319-90-8	244	22.62	244	2	4
185	MCPB-ethyl	C13H17ClO3	10443-70-6	256	22.982	115	2	4
186	Mefenacet	C16H14N2O2S	73250-68-7	298	31.059	192	10	20
187	Mefenpyr-diethyl	C16H18Cl2N2O4	135590-91-9	372	29.527	253	2	4
188	Methyl dymron	C17H20N2O	42609-73-4	268	25.576	107	2	4
189	Metolachlor	C15H22ClNO2	51218-45-2	283	24.449	162	2	4
190	Metribuzin	C8H14N4OS	21087-64-9	214	23.318	198	2	4
191	Metribuzin DA	C8H13N3OS	35045-02-4	199	22.919	199	2	4
192	Metribuzin DADK	C8H14N4OS	21087-64-9	214	18.456	154	2	4
193	Metribuzin DK	C8H14N4OS	21087-64-9	214	20.603	168	2	4
194	Molinate	C9H17NOS	2212-67-1	187	18.597	126	2	4
195	Nitralin	C13H19N3O6S	4726-14-1	345	29.345	316	50	100
196	Nitrofen (NIP)	C12H7Cl2NO3	1836-75-5	283	27.532	283	5	10
197	Norflurazon	C12H9ClF3N3O	27314-13-2	303	28.596	303	2	4
198	Oryzalin	C12H18N4O6S	19044-88-3	346	31.831	317	2	4
199	Oxabetrinil	C12H12N2O3	74782-23-3	232	22.791	73	2	4
200	Oxadiazon	C15H18Cl2N2O3	19666-30-9	344	26.975	258	2	4
201	Oxyfluorfen	C15H11ClF3NO4	42874-03-3	361	27.098	252	2	4
202	Pebulate	C10H21NOS	1114-71-2	203	17.328	128	2	4
203	Pendimethalin	C13H19N3O4	40487-42-1	281	25.313	252	2	4
204	Pentachlorophenol	C6HCl5O	87-86-5	264	21.563	266	40	80
205	Pentoxazone	C17H17ClFNO4	110956-75-7	353	30.733	285	2	4
206	Phenmedipham deg.				20.094	167	50	100
207	Picolinafen	C19H12F4N2O2	137641-05-5	376	30.037	376	2	4
208	Piperophos	C14H28NO3PS2	24151-93-7	353	30.05	320	2	4
209	Pretilachlor	C17H26ClNO2	51218-49-6	311	26.789	162	2	4
210	Prometryn	C10H19N5S	7287-19-6	241	23.787	241	2	4
211	Propachlor	C11H14ClNO	1918-16-7	211	19.546	120	2	4
212	Propanil	C9H9Cl2NO	709-98-8	217	23.191	161	2	4
213	Propazine	C9H16ClN5	139-40-2	229	21.69	214	2	4
214	Propham	C10H13NO2	122-42-9	179	17.287	179	2	4
215	Propyzamide	C12H11Cl2NO	23950-58-5	255	22.031	173	2	4
216	Pyraflufen ethyl	C15H13Cl2F3N2O4	129630-17-7	412	28.79	412	2	4
217	Pyrazoxyfen	C20H16Cl2N2O3	71561-11-0	402	35.024	105	2	4
218	Pyributicarb	C18H22N2O2S	88678-67-5	330	29.617	165	2	4
219	Pyridate	C19H23ClN2O2S	55512-33-9	378	34.285	207	4	8
220	Pyriminobac-methyl E	C17H19N3O6	136191-64-5	361	28.738	302	2	4
221	Pyriminobac-methyl Z	C17H19N3O6	136191-64-5	361	27.726	302	2	4
222	Quinoclamine	C10H6ClNO2	2797-51-5	207	24.358	172	2	4
223	Quizalofop-ethyl	C19H17ClN2O4	76578-14-8	372	33.502	299	20	40
224	Simazine (CAT)	C7H12ClN5	122-34-9	201	21.455	201	10	20
225	Simetryn	C8H15N5S	1014-70-6	213	23.601	213	2	4
226	Sulfentrazone	C11H10Cl2F2N4O3S	122836-35-5	386	30.056	307	2	4
227	Swep	C8H7Cl2NO2	1918-18-9	219	21.575	187	2	4
228	Terbacil	C9H13ClN2O2	5902-51-2	216	22.385	161	2	4
229	Terbcarb (MBPMC)	C17H27NO2	1918-11-2	277	23.231	205	2	4
230	Terbutryn	C10H19N5S	886-50-0	241	24.101	226	2	4
231	Thenylchlor	C16H18ClNO2S	96491-05-3	323	29.057	127	4	8
232	Thiobencarb	C12H16ClNOS	28249-77-6	257	24.543	100	2	4
233	Tri-allate	C10H16Cl3NOS	2303-17-5	303	22.592	268	2	4
234	Tribenuron-methyl	C15H17N5O6S	101200-48-0	395	15.34	154	2	4
235	Triclopyr	C7H4Cl3NO3	55335-06-3	255	27.233	212	2	4
236	Trifluralin	C13H16F3N3O4	1582-09-8	335	20.406	306	2	4
237	3-Hydroxycarbofuran 1	C12H15NO4	16655-82-6	237	17.174	137	2	4
238	3-Hydroxycarbofuran 2	C12H15NO4	16655-82-6	237	23.434	137	5	10
239	Acephate	C4H10NO3PS	30560-19-1	183	16.808	136	10	20
240	Acetamiprid	C10H11ClN4	135410-20-7	222	29.719	152	2	4
241	a-HCH	C6H6Cl6	319-84-6	288	20.886	219	2	4
242	Aldoxycarb deg.	C7H14N2O4S	1646-88-4	222	11.404	68	2	4
243	Aldrin	C12H8Cl6	309-00-2	362	24.557	263	2	4
244	Allethrin 1	C19H26O3	584-79-2	302	25.583	123	2	4
245	Allethrin 2 & Bioallethrin 1	C19H26O3	584-79-2	302	25.715	123	2	4
246	Azamethiphos	C9H10ClN2O5PS	35575-96-3	324	28.443	215	2	4
247	Azinphos-ethyl	C12H16N3O3PS2	2642-71-9	345	31.598	132	10	20
248	Azinphos-methyl	C10H12N3O3PS2	86-50-0	317	30.861	160	10	20
249	Bendiocarb	C11H13NO4	22781-23-3	223	20.493	151	2	4
250	b-HCH	C6H6Cl6	319-85-7	288	21.548	219	2	4
251	Bifenazate	C17H20N2O3	149877-41-8	300	30.091	258	20	40
252	Bifenthrin	C23H22ClF3O2	82657-04-3	422	29.982	181	2	4
253	Bioresmethrin	C22H26O3	28434-01-7	338	29.437	123	10	20
254	Bis(2-chloroisopropyl)ether	C6H12Cl2O	108-60-1	170	9.925	121	2	4
255	Bromophos	C8H8BrCl2O3PS	2104-96-3	364	25.039	331	10	20
256	Buprofezin	C16H23N3OS	69327-76-0	305	27.152	105	2	4
257	Cadusafos	C10H23O2PS2	95465-99-9	270	20.709	159	2	4
258	Carbaryl	C12H11NO2	63-25-2	201	23.613	144	2	4
259	Carbofuran	C12H15NO3	1563-66-2	221	21.441	164	2	4
260	Carbophenothion	C11H16ClO2PS3	786-19-6	342	28.593	121	10	20
261	Chlorethoxyfos	C6H11Cl4O3PS	54593-83-8	334	19.685	153	10	20
262	Chlorfenapyr	C15H11BrClF3N2O	122453-73-0	406	27.344	59	2	4
263	Chlorfenson	C12H8Cl2O3S	80-33-1	302	26.705	175	5	10
264	Chlorfenvinphos E	C12H14Cl3O4P	18708-86-6	358	25.322	267	100	200
265	Chlorfenvinphos Z	C12H14Cl3O4P	18708-87-7	358	25.578	267	20	40
266	Chlormephos	C5H12ClO2PS2	24934-91-6	235	16.945	234	2	4
267	Chlorpropylate	C17H16Cl2O3	5836-10-2	338	27.748	251	2	4
268	Chlorpyrifos	C9H11Cl3NO3PS	2921-88-2	349	24.499	314	20	40
269	Chlorpyrifos-methyl	C7H7Cl3NO3PS	5598-13-0	321	23.309	286	5	10
270	cis-Chlordane	C10H6Cl8	5103-71-9	406	26.421	373	2	4
271	Coumaphos	C14H16ClO5PS	56-72-4	362	32.335	362	50	100
272	Crimidine	C7H10ClN3	535-89-7	172	18.025	156	2	4
273	Cyanofenphos	C15H14NO2PS	13067-93-1	303	28.624	169	10	20
274	Cyanophos, CYAP	C9H10NO3PS	2636-26-2	243	21.936	243	2	4
275	Cyfluthrin 1	C22H18Cl2FNO3	68359-37-5	433	32.877	163	2	4
276	Cyfluthrin 2	C22H18Cl2FNO3	68359-37-5	433	33.001	163	2	4
277	Cyfluthrin 3	C22H18Cl2FNO3	68359-37-5	433	33.071	163	2	4
278	Cyfluthrin 4	C22H18Cl2FNO3	68359-37-5	433	33.127	163	2	4
279	Cyhalothrin 1	C23H19ClF3NO3	68085-85-8	449	30.987	181	2	4
280	Cyhalothrin 2	C23H19ClF3NO3	68085-85-8	449	31.208	181	2	4
281	Cypermethrin 1	C22H19Cl2NO3	52315-07-8	415	33.283	163	2	4
282	Cypermethrin 2	C22H19Cl2NO3	52315-07-8	415	33.414	163	2	4
283	Cypermethrin 3	C22H19Cl2NO3	52315-07-8	415	33.479	163	2	4
284	Cypermethrin 4	C22H19Cl2NO3	52315-07-8	415	33.532	163	2	4
285	Cyromazine	C6H10N6	66215-27-8	166	21.655	151	2	4
286	DDVP	C4H7Cl2O4P	62-73-7	220	13.583	185	2	4
287	Deltamethrin	C22H19Br2NO3	52918-63-5	503	35.299	181	2	4
288	Demeton-S-methyl	C6H15O3PS2	919-86-8	230	19.76	142	2	4
289	Demeton-S-methylsulphon	C6H15O5PS2	17040-19-6	262	23.916	169	2	4
290	d-HCH	C6H6Cl6	319-86-8	288	22.528	219	2	4
291	Dialifos	C14H17cLNO4PS2	10311-84-9	394	31.676	208	50	100
292	Diazinon	C12H21N2O3PS	333-41-5	304	22.137	137	2	4
293	Diazinon oxon	C12H21N2O4P	962-58-3	288	21.779	273	2	4
294	Dichlofenthion, ECP	C10H13Cl2O3PS	97-17-6	314	23.168	279	10	20
295	Dicrotophos	C8H16NO5P	141-66-2	237	20.357	127	4	8
296	Dieldrin	C12H8Cl6O	60-57-1	378	27.067	79	2	4
297	Diflubenzuron	C14H9ClF2N2O2	35367-38-5	310	14.986	141	2	4
298	Dimethoate	C5H12NO3PS2	60-51-5	229	21.244	125	2	4
299	Dimetylvinphos 1	C10H10Cl3O4P	2274-67-1	330	24.219	295	2	4
300	Dimetylvinphos 2	C10H10Cl3O4P	2274-67-1	330	24.55	295	2	4
301	Dinoseb	C10H12N2O5	88-85-7	240	22.295	211	2	4
302	Diofenolan 1	C18H20O4	63837-33-2	300	28.702	300	2	4
303	Diofenolan 2	C18H20O4	63837-33-2	300	28.854	300	2	4
304	Dioxabenzofos(Salithion)	C8H9O3PS	3811-49-2	216	20.451	216	2	4
305	Disulfoton	C8H19O2PS3	298-04-4	274	22.398	88	2	4
306	Endosulfan I	C9H6Cl6O3S	959-98-8	404	26.414	241	2	4
307	Endosulfan II	C9H6Cl6O3S	33213-65-9	404	27.828	195	2	4
308	Endosulfan sulfate	C9H6Cl6O4S	1031-07-8	420	28.723	272	2	4
309	Endrin	C12H8Cl6O	72-20-8	378	27.568	263	2	4
310	Endrin aldehyde	C12H8Cl6O	7421-93-4	378	28.163	345	2	4
311	Endrin ketone	C12H8Cl6O	53494-70-5	378	29.824	317	2	4
312	EPN	C14H14NO4PS	2104-64-5	323	29.981	157	10	20
313	EPN oxon	C14H14NO5P	2012-00-2	307	28.946	141	2	4
314	Esfenvalerate 1	C25H22ClNO3	66230-04-4	419	34.385	225	2	4
315	Esfenvalerate 2	C25H22ClNO3	66230-04-4	419	34.637	225	2	4
316	Ethiofencarb	C11H15NO2S	29973-13-5	225	22.939	107	2	4
317	Ethion	C9H22O4P2S4	563-12-2	384	27.977	231	10	20
318	Ethoprophos	C8H19O2PS2	13194-48-4	242	19.972	158	10	20
319	Etofenprox	C25H28O3	80844-07-1	376	33.68	163	2	4
320	Etoxazole metabolite				30.403	246	10	20
321	Etrimfos	C10H17N2O4PS	38260-54-7	292	22.547	292	10	20
322	Famphur	C10H16NO5PS2	52-85-7	325	28.468	218	2	4
323	Fenchlorphos	C8H8Cl3O3PS	299-84-3	320	23.736	285	2	4
324	Fenitrothion (MEP)	C9H12NO5PS	122-14-5	261	24.107	277	20	40
325	Fenitrothion oxon	C9H12NO6P	2255-17-6	261	23.155	244	2	4
326	Fenobucarb	C12H17NO2	3766-81-2	207	19.537	150	2	4
327	Fenoxycarb	C17H19NO4	72490-01-8	301	30.085	116	2	4
328	Fenthion	C10H15O3PS2	55-38-9	278	24.613	278	4	8
329	Fenvalerate 1	C25H22ClNO3	51630-58-1	419	34.389	167	2	4
330	Fenvalerate 2	C25H22ClNO3	51630-58-1	419	34.64	167	2	4
331	Fipronil	C12H4Cl2F6N4OS	120068-37-3	437	25.436	367	2	4
332	Flucythrinate 1	C26H23F2NO4	70124-77-5	451	33.492	199	2	4
333	Flucythrinate 2	C26H23F2NO4	70124-77-5	451	33.736	199	2	4
334	Flufenoxuron dec2	C21H11ClF6N2O3	101463-69-8	488	22.309	331	2	4
335	Flufenoxuron dec3	C21H11ClF6N2O3	101463-69-8	488	22.716	305	2	4
336	Fluvalinate 1	C26H22ClF3N2O3	69409-94-5	502	34.531	250	2	4
337	Fluvalinate 2	C26H22ClF3N2O3	69409-94-5	502	34.613	250	2	4
338	Fonofos	C10H15OPS2	994-22-9	246	22.027	246	2	4
339	g-HCH	C6H6Cl6	58-89-9	288	21.782	219	2	4
340	Heptachlor	C10H5Cl7	76-44-8	370	23.66	272	2	4
341	Heptachlor epoxide (B)	C10H5Cl7O	1024-57-3	386	25.524	353	2	4
342	Indoxacarb	C22H17ClF3N3O7	144171-61-9	528	35.111	150	50	100
343	Isazofos	C9H17ClN3O3PS	42509-80-8	313	22.431	161	5	10
344	Isocarbophos	C11H16NO4PS	24353-61-5	289	24.796	136	2	4
345	Isofenphos	C15H24NO4PS	25311-71-1	345	25.553	213	10	20
346	Isofenphos oxon	C15H24NO5P	31120-85-1	329	24.747	229	10	20
347	Isoprocarb	C11H15NO2	2631-40-5	193	18.487	121	2	4
348	Isoxathion	C13H16NO4PS	18854-01-8	313	27.424	177	10	20
349	Isoxathion oxon	C13H16NO5P	32306-29-9	297	26.808	161	2	4
350	Leptophos	C13H10BrCl2O2PS	21609-90-5	412	30.784	377	15	30
351	Malathion	C10H19O6PS2	121-75-5	330	24.359	173	5	10
352	Mecarbam	C10H20NO5PS2	2595-54-2	329	25.636	131	5	10
353	Methacrifos	C7H13O5PS	30864-28-9	240	17.897	208	5	10
354	Methamidophos	C2H8NO2PS	10265-92-6	141	13.214	94	10	20
355	Methidathion	C6H11N2O4PS3	950-37-8	302	26.069	145	2	4
356	Methiocarb	C11H15NO2S	2032-65-7	225	24.139	168	2	4
357	Methoprene	C19H34O3	40596-69-8	310	25.967	73	4	8
358	Methoxychlor	C16H15Cl3O2	72-43-5	344	30.124	227	2	4
359	Methyl parathion	C8H10NO5PS	298-00-0	263	23.467	263	2	4
360	Mevinphos 1	C7H13O6P	7786-34-7	224	16.669	127	2	4
361	Mevinphos 2	C7H13O6P	7786-34-7	224	16.734	127	2	4
362	Monocrotophos	C7H14NO5P	6923-22-4	223	20.607	127	2	4
363	Naled	C4H7Br2Cl2O4P	300-76-5	378	20.223	109	2	4
364	Nereistoxin oxalate deg.				14.151	149	2	4
365	Novaluron deg.	C17H9ClF8N2O4	116714-46-6	492	14.113	335	2	4
366	o,p'-DDD	C14H10Cl4	53-19-0	318	27.113	235	2	4
367	o,p'-DDE	C14H8Cl4	3424-82-6	316	26.176	246	2	4
368	o,p'-DDT	C14H9Cl5	789-02-6	352	28.009	235	2	4
369	Omethoate	C5H12NO4PS	1113-02-6	213	19.255	156	2	4
370	Oxychlordane	C10H4Cl8O	27304-13-8	420	25.537	387	4	8
371	p,p'-DDD	C14H10Cl4	72-54-8	318	27.957	235	2	4
372	p,p'-DDE	C14H8Cl4	72-55-9	316	26.96	246	2	4
373	p,p'-DDT	C14H9Cl5	50-29-3	352	28.844	235	5	10
374	Parathion	C10H14NO5PS	56-38-2	291	24.699	291	2	4
375	Permethrin 1	C21H20Cl2O3	52645-53-1	390	32.209	183	2	4
376	Permethrin 2	C21H20Cl2O3	52645-53-1	390	32.37	183	2	4
377	Phenothrin 1	C23H26O3	26002-80-2	350	30.544	183	2	4
378	Phenothrin 2	C23H26O3	26002-80-2	350	30.686	183	2	4
379	Phenthoate	C12H17O4PS2	2597-03-7	320	25.713	274	2	4
380	Phorate	C7H17O2PS3	298-02-2	260	20.81	260	20	40
381	Phosalone	C12H15ClNO4PS2	2310-17-0	367	30.763	182	10	20
382	Phosmet	C11H12NO4PS2	732-11-6	317	29.908	160	2	4
383	Phosphamidon	C10H19ClNO5P	13171-21-6	299	23.093	127	2	4
384	Piperonyl butoxide	C19H30O5	51-03-6	338	29.371	176	2	4
385	Pirimicarb	C11H18N4O2	23103-98-2	238	22.748	166	2	4
386	Pirimiphos-methyl	C11H20N3O3PS	29232-93-7	305	24.055	290	10	20
387	Profenofos	C11H15BrClO3PS	41198-08-7	372	26.873	337	40	80
388	Propaphos	C13H21O4PS	7292-16-2	304	26.154	220	10	20
389	Propetamphos	C10H20NO4PS	31218-83-4	281	21.94	138	2	4
390	Propoxur	C11H15NO3	114-26-1	209	19.565	110	2	4
391	Prothiofos	C11H15Cl2O2PS2	34643-46-4	344	26.759	309	2	4
392	Pyraclofos	C14H18ClN2O3PS	77458-01-6	360	31.769	360	2	4
393	Pyrethrin 1	C21H28O3	8003-34-7	328	27.224	123	2	4
394	Pyrethrin 2	C22H28O5	8003-34-7	372	28.087	123	2	4
395	Pyrethrin 3		8003-34-7		28.402	123	2	4
396	Pyrethrin 4		8003-34-7		30.776	107	2	4
397	Pyridaben	C19H25ClN2OS	96489-71-3	364	32.403	147	2	4
398	Pyridaphenthion	C14H17N2O4PS	119-12-0	340	29.744	340	50	100
399	Pyriproxyfen	C20H19NO3	95737-68-1	321	30.994	136	2	4
400	Quinalphos	C12H15N2O3PS	13593-03-8	298	25.728	146	2	4
401	Silafluofen	C25H29FO2Si	105024-66-6	408	33.869	179	2	4
402	Sulfotep	C8H20O5P2S2	3689-24-5	322	20.53	322	10	20
403	Sulprofos	C12H19O3PS2	38527-90-1	306	28.345	322	20	40
404	Tebupirimfos	C13H23N2O3PS	96182-53-5	318	22.743	318	2	4
405	Tefluthrin	C17H14ClF7O2	79538-32-2	418	22.517	177	2	4
406	Temephos	C16H20O6P2S3	3383-96-8	466	37.518	466	2	4
407	Terbufos	C9H21O2PS3	13071-79-9	288	21.945	231	5	10
408	Tetrachlorvinphos	C10H9Cl4O4P	22248-79-9	364	26.216	329	10	20
409	Tetramethrin-1		8003-34-7		29.851	164	10	20
410	Tetramethrin-2		8003-34-7		30.051	164	2	4
411	Thiacloprid	C10H9ClN4S	111988-49-9	252.7	34.224	101	40	80
412	Thiamethoxam deg.				25.196	212	20	40
413	Thiocyclam	C5H11NS3	31895-21-3	181	17.931	135	2	4
414	Thiometon	C6H15O2PS3	640-15-3	246	21.115	88	2	4
415	Tolfenpyrad	C21H22ClN3O2	129558-76-5	383	35.83	383	2	4
416	Tralomethrin deg.	C22H19Br4NO3	66841-25-6	661	35.298	253	2	4
417	trans-Chlordane	C10H6Cl8	5103-74-2	406	26.11	373	2	4
418	trans-Nonachlor	C10H5Cl9	5103-73-1	440	26.49	409	10	20
419	Triazophos	C12H16N3O3PS	24017-47-8	313	28.306	161	2	4
420	Trichlorfon	C4H8Cl3O4P	52-68-6	256	17.231	109	2	4
421	XMC	C10H13NO2	2655-14-3	179	18.872	122	2	4
422	Xylylcarb	C10H13NO2	2425-10-7	179	19.407	122	2	4
423	Diethyl-p-nitrophenyl phosphate	C10H14NO6P	311-45-5	275	23.796	109	25	50
424	6-Benzylaminopurine	C12H11N5	1214-39-7	225	30.286	225	2	4
425	Acrinathrin	C26H21F6NO5	101007-06-1	541	31.431	181	2	4
426	Amitraz	C19H23N3	33089-61-1	293	31.167	293	2	4
427	Amitraz deg.				18.633	162	2	4
428	Bromopropylate	C17H16Br2O3	18181-80-1	426	30.011	341	2	4
429	Chlorobenzilate	C16H14Cl2O3	510-15-6	324	27.751	251	2	4
430	Clofentezine	C14H8Cl2N4	74115-24-5	302	12.19	137	2	4
431	Dicofol	C14H9Cl5O	115-32-2	368	30.246	139	2	4
432	Dicofol deg.	C14H9Cl5O	115-32-2	368	24.88	139	2	4
433	Ethychlozate	C11H11ClN2O2	27512-72-7	238	25.571	165	20	40
434	Etoxazole	C21H23F2NO2	153233-91-1	359	30.163	204	2	4
435	Fenamiphos	C13H22NO3PS	22224-92-6	303	26.589	303	25	50
436	Fenothiocarb	C13H19NO2S	62850-32-2	253	26.35	160	2	4
437	Fenpropathrin	C22H23NO3	39515-41-8	349	30.209	181	2	4
438	Fensulfothion	C11H17O4PS2	115-90-2	308	27.789	293	15	30
439	Fluacrypyrim	C20H21F3N2O5	229977-93-9	426	28.147	204	2	4
440	Fosthiazate 1	C9H18NO3PS2	98886-44-3	283	25.082	195	2	4
441	Fosthiazate 2	C9H18NO3PS2	98886-44-3	283	25.143	195	2	4
442	Halfenprox	C24H23BrF2O3	111872-58-3	476	33.377	263	2	4
443	Hexythiazox	C17H21ClN2O2S	78587-05-0	352	26.118	227	2	4
444	Methomyl oxime	C5H11N3O2S	13749-94-5	105	10.018	105	2	4
445	Paclobutrazol	C15H20ClN3O	76738-62-0	293	26.26	236	2	4
446	Probenazole	C10H9NO3S	27605-76-1	223	24.173	130	2	4
447	Prohydrojasmon	C15H26O3	158474-72-7	254	22.416	153	2	4
448	Propargite 1	C19H26O4S	2312-35-8	350	29.221	135	2	4
449	Propargite 2	C19H26O4S	2312-35-8	350	29.251	135	2	4
450	Pyrimidifen	C20H28ClN3O2	105779-78-0	377	34.171	184	2	4
451	Spirodiclofen	C21H24Cl2O4	148477-71-8	410	32.016	71	2	4
452	Tebufenpyrad	C18H24ClN3O	119168-77-3	333	30.333	171	2	4
453	Tecloftalam	C14H5Cl6NO3	76280-91-6	473	35.66	394	4	8
454	Tetradifon	C12H6Cl4O2S	116-29-0	354	30.616	356	2	4
455	Tribufos	C12H27OSP3	78-48-8	314	27.035	169	2	4
456	Triflumizole	C15H15ClF3N3O	99387-89-0	345	25.843	278	2	4
457	Uniconazole P	C15H18ClN3O	83657-17-4	291	26.972	234	2	4
458	Vinclozolin	C12H9Cl2NO3	50471-44-8	285	23.396	285	2	4
459	Zoxamide	C14H16Cl3NO2	156052-68-5	335	29.501	187	2	4
460	Stigmastanol	C29H52O	83-45-4	416	38.062	215	40	80
461	Carbamazepine	C15H12N2O	298-46-4	236	28.835	193	2	4
462	2,6-Di-t-butyl-4-ethylphenol	C16H26O	4130-42-1	234	18.777	219	5	10
463	2,6-Di-tert-butyl-4-benzoquinone	C14H20O2	719-22-2	220	17.365	177	5	10
464	2-tert-Butyl-4-methoxyphenol	C11H16O2	121-00-6	180	17.694	165	2	4
465	4-Methyl-2,6-di-t-butylphenol	C15H24O	128-37-0	220	18.008	220	5	10
466	N-Phenyl-1-naphthylamine	C16H13N	90-30-2	219	26.622	219	5	10
467	N-Phenyl-2-naphthylamine	C16H13N	135-88-6	219	27.659	219	5	10
468	3,5-di-tert-Butyl-4-hydroxybenzaldehyde	C15H22O2	1620-98-0	234	21.73	219	2	4
469	2-Ethyl-1-hexanol	C8H18O	104-76-7	130	9.379	83	2	4
470	Ethanol, 2-phenoxy-	C8H10O2	122-99-6	138	13.137	94	2	4
471	Squalane	C30H62	111-01-3	422	31.768	85	5	10
472	Octanol	C8H18O	111-87-5	130	10.247	56	2	4
473	2-Methyl-2,4-pentandiol	C6H14O2	107-41-5	118	7.108	59	2	4
474	1,4-Benzenediol	C6H6O2	123-31-9	110	13.965	110	2	4
475	4-Chlorophenylphenyl ether	C12H9ClO	7005-72-3	204	19.478	204	2	4
476	2-Methylphenol	C7H8O	95-48-7	108	9.796	108	2	4
477	3-&4-Methylphenol	C7H8O	108-39-4&106-44-5	108	10.234	107	4	8
478	Phenol	C6H6O	108-95-2	94	8.211	94	2	4
479	(10Z)-pentadecenoic acid, methyl ester	C16H30O2	90176-52-6	254	22.605	220	2	4
480	(9Z)-9-Tetradecenoic acid, methyl ester	C15H28O2	56219-06-8	240	21.232	240	2	4
481	Arachidic acid methyl ester	C21H42O2	1120-28-1	326	28.547	326	2	4
482	Arachidonic acid methyl ester	C21H34O2	2566-89-4	318	27.788	150	1	2
483	Behenic acid methyl ester	C23H46O2	929-77-1	354	30.598	354	2	4
484	cis-10-Heptadecenoic acid methyl ester	C18H32O2	75190-82-8	282	24.879	250	1	2
485	cis-11,14,17-Eicosatrienoic acid methyl ester	C21H36O2	55682-88-7	320	28.277	95	1	2
486	cis-11,14-Eicosadienoic acid methyl ester	C21H38O2	2463-02-7	322	28.207	322	1	2
487	cis-11-Eicosenoic acid methyl ester	C21H40O2	2390-09-2	324	28.269	292	1	2
488	cis-13,16-Docosadienoic acid methyl ester	C23H42O2	61012-47-3	350	30.302	350	1	2
489	cis-4,7,10,13,16,19-Docosahexaenoic acid methyl ester	C23H34O2	301-01-9	342	29.805	119	1	2
490	cis-5,8,11,14,17-Eicosapentaenoic acid, methyl ester	C21H32O2	2734-47-6	316	27.854	119	1	2
491	cis-8,11,14-Eicosatrienoic acid methyl ester	C21H36O2	21061-10-9	320	27.994	150	1	2
492	Elaidic acid methyl ester	C19H36O2	1937-62-8	296	26.093	264	2	4
493	Erucic acid methyl ester	C23H44O2	1120-34-9	352	30.348	320	1	2
494	gamma-Linolenic acid methyl ester	C19H32O2	301-00-8	292	25.737	292	1	2
495	Heneicosanoic acid methyl ester	C22H44O2	6064-90-0	340	29.592	340	1	2
496	Lignoceric acid, methyl ester	C25H50O2	2442-49-1	382	32.5	382	2	4
497	Linoleic acid methyl ester	C19H34O2	112-63-0	294	26.033	294	1	2
498	Linolelaidic acid methyl ester	C19H34O2	2566-97-4	294	25.938	294	1	2
499	Linolenic acid methyl ester	C19H32O2	7361-80-0	292	26.006	292	1	2
500	Methyl decanoate	C11H22O2	110-42-9	186	15.015	87	2	4
501	Methyl dodecanoate	C13H26O2	111-82-0	214	18.294	87	2	4
502	Methyl heptadecanoate	C18H36O2	1731-92-6	284	25.135	284	1	2
503	Methyl hexanoate	C7H14O2	106-70-7	130	7.123	87	2	4
504	Methyl myristate	C15H30O2	124-10-7	242	21.235	87	2	4
505	Methyl octanoate	C9H18O2	111-11-5	158	11.315	87	2	4
506	Methyl palmitate	C17H34O2	112-39-0	270	23.895	270	3	6
507	Methyl palmitoleate	C17H32O2	1120-25-8	268	23.625	236	1	2
508	Methyl pentadecanoate	C16H32O2	7132-64-1	256	22.597	87	1	2
509	Methyl tridecanoate	C14H28O2	1731-88-0	228	19.803	87	1	2
510	Methyl undecanoate	C12H24O2	1731-86-8	200	16.701	87	1	2
511	Nervonic acid methyl ester	C25H48O2	2733-88-2	380	32.279	348	1	2
512	Oleic acid methyl ester	C19H36O2	112-62-9	296	26.019	264	1	2
513	Stearic acid methyl ester	C19H38O2	112-61-8	298	26.322	298	2	4
514	Tricosanoic acid methyl ester	C24H48O2	2433-97-8	368	31.566	368	1	2
515	1,2,5,6,9,10-Hexabromocyclododecane	C12H18Br6	3194-55-6	636	35.974	239	2	4
516	2,2',4,4',5,5'-Hexabromobiphenyl (BB-153)	C12H4Br6	59080-40-9	622	34.554	308	2	4
517	2,2',4,4',5,5'-Hexabromodiphenyl ether (BDE-153)	C12H4Br6O	68631-49-2	638	35.296	484	2	4
518	2,2',4,4'-Tetrabromodiphenyl ether (BDE-47)	C12H6Br4O	5436-43-1	482	30.549	326	2	4
519	2,2',5,5'-Tetrabromobiphenyl (BB-52)	C12H6Br4	15721-02-5	466	28.612	310	2	4
520	2,2'-Dibromobiphenyl (BB-4)	C12H8Br2	59080-37-4	310	22.061	312	2	4
521	2,4-Dibromodiphenyl ether (BDE-7)	C12H8Br2O		326	24.106	328	2	4
522	Tributyl phosphate (TBP)	C12H27O4P	126-73-8	266	20.067	99	2	4
523	Tri-n-propylphosphate	C9H21O4P	513-08-6	224	15.735	99	10	20
524	Tris(1,3-dichloro-2-propyl)phosphate (TDCPP)	C9H15Cl6O4P	13674-87-8	428	28.432	381	25	50
525	Tris(1-chloro-2-propyl)phosphate (TCPP) 1	C9H18Cl3O4P	13674-84-5	328	21.934	99	10	20
526	Tris(1-chloro-2-propyl)phosphate (TCPP) 2	C9H18Cl3O4P	13674-84-5	328	22.13	99	100	200
527	Tris(2-chloroethyl)phosphate (TCEP)	C6H12Cl3O4P	115-96-8	284	21.696	249	10	20
528	Tris(2-chloroethyl)phosphite	C6H12Cl3O3P	140-08-9	268	19.565	233	10	20
529	Tricresyl phosphate	C21H21O4P	1330-78-5	368	31.994	368	25	50
530	Tris(2-ethylhexyl)phosphate (TEHP)	C24H51O4P	78-42-2	434	29.81	99	25	50
531	Propanoic acid, 2-methyl-, 2-methylpropyl ester	C8H16O2	97-85-8	144	6.925	71	2	4
532	2-Heptanol	C7H16O	543-49-7	116	6.618	45	2	4
533	Butanoic acid, butyl ester	C8H16O2	109-21-7	136	8.692	89	2	4
534	Diphenyl ether	C12H10O	101-84-8	170	16.413	170	5	10
535	Phenylethyl alcohol	C8H10O	60-12-8	122	11.1	122	2	4
536	Anthraquinone	C14H8O2	84-65-1	208	24.601	208	5	10
537	Acetophenone	C8H8O	98-86-2	120	10.156	105	2	4
538	N-Nitrosodiethylamine	C4H10N2O	55-18-5	102	6.47	102	2	4
539	1,4-Dichlorobenzene	C6H4Cl2	106-46-7	146	9.127	146	2	4
540	1-Nonanol	C9H20O	143-08-8	144	12.243	83	2	4
541	Bisphenol A	C15H16O2	80-05-7	228	26.83	213	5	10
542	2-Nitrophenol	C6H5NO3	88-75-5	139	11.459	139	2	4
543	Aniline	C6H7N	62-53-3	93	8.233	93	2	4
544	Crotamiton	C13H17NO	483-63-6	203	19.367	69	2	4
545	1,3-Dicyclohexylurea	C13H24N2O	2387-23-7	224	25.577	224	2	4
546	2(3H)-Benzothiazolone	C7H5NOS	934-34-9	151	20.523	151	2	4
547	2-(Methylthio)-benzothiazol	C8H7NS2	615-22-5	181	19.597	181	5	10
548	2-Acetyl-5-methylthiophene	C7H8OS	13679-74-8	140	12.913	125	2	4
549	2-Cyclohexen-1-one	C6H8O	930-68-7	96	7.258	96	2	4
550	2-Methoxyphenol	C7H8O2	90-05-1	124	10.547	109	5	10
551	Acetamide, N-(2-phenylethyl)-	C10H13NO	877-95-2	163	18.028	104	2	4
552	Acetamide, N-phenyl-	C8H9NO	103-84-4	135	15.85	135	2	4
553	Benzaldehyde, 4-hydroxy-3,5-dimethoxy-	C9H10O4	134-96-3	182	20.241	182	2	4
554	Benzamide, N-phenyl-	C13H11NO	93-98-1	197	24.367	197	2	4
555	Benzothiazole	C7H5NS	95-16-9	135	13.335	135	2	4
556	Cyclohexanol	C6H12O	108-93-0	100	6.295	82	2	4
557	Formamide, N-cyclohexyl-	C7H13NO	766-93-8	127	13.85	84	2	4
558	Phenol, 2,6-dimethoxy-	C8H10O3	91-10-1	154	15.41	154	2	4
559	Phenol, 4-(phenylamino)-	C12H11NO	122-37-2	185	23.971	185	2	4
560	Phthalimide	C8H5NO2	85-41-6	147	17.441	147	2	4
561	Urea, N,N-diethyl-	C5H12N2O	634-95-7	116	11.709	116	2	4
562	2-Ethylhexyl diphenyl phosphate (EHDP)	C20H27O4P	1241-94-7	362	29.289	251	10	20
563	Dibutyl phenyl phosphate (DBPP)	C14H23O4P	2528-36-1	286	23.043	175	10	20
564	4-n-Octylphenol	C14H22O	1806-26-4	206	21.823	107	2	4
565	4-Nonylphenol	C15H24O	25154-52-3	220	21.57	135	2	4
566	4-tert-Octylphenol	C14H22O	140-66-9	206	19.492	135	2	4
567	Isosafrole-1	C10H10O2	120-58-1	162	15.347	162	2	4
568	Isosafrole-2	C10H10O2	120-58-1	162	16.012	162	2	4
569	alpha-Terpineol	C10H18O	10482-56-1	154	12.751	136	5	10
570	Dibenzothiophene	C12H8S	132-65-0	184	21.788	184	5	10
571	n-C10H22	C10H22	124-18-5	142	8.802	85	2	4
572	n-C12H26	C12H26	112-40-3	170	12.81	85	2	4
573	n-C14H30	C14H30	629-59-4	198	16.335	85	2	4
574	n-C16H34	C16H34	544-76-3	226	19.469	85	2	4
575	n-C18H38	C18H38	593-45-3	254	22.284	85	2	4
576	n-C20H42	C20H42	112-95-8	282	24.839	85	2	4
577	n-C22H46	C22H46	629-97-0	310	27.172	85	2	4
578	n-C24H50	C24H50	646-31-1	338	29.316	85	2	4
579	n-C26H54	C26H54	630-01-3	366	31.297	85	2	4
580	n-C28H58	C28H58	630-02-4	394	33.138	85	2	4
581	n-C30H62	C30H62	638-68-6	422	34.857	85	4	8
582	n-C32H66	C32H66	4981-99-1	451	36.521	85	4	8
583	n-C11H24	C11H24	1120-21-4	156	10.872	85	2	4
584	n-C13H28	C13H28	629-50-5	184	14.627	85	2	4
585	n-C15H32	C15H32	629-62-9	212	17.945	85	2	4
586	n-C17H36	C17H36	629-78-7	240	20.913	85	2	4
587	n-C19H40	C19H40	629-92-5	268	23.591	85	2	4
588	n-C21H44	C21H44	629-94-7	296	26.03	85	2	4
589	n-C23H48	C23H48	638-67-5	324	28.265	85	2	4
590	n-C25H52	C25H52	629-99-2	352	30.325	85	2	4
591	n-C27H56	C27H56	593-49-7	380	32.235	85	2	4
592	n-C29H60	C29H60	630-03-5	408	34.013	85	2	4
593	n-C31H64	C31H64	630-04-6	437	35.676	85	4	8
594	n-C33H68	C33H68	630-05-7	465	37.478	85	4	8
595	n-C9H20	C9H20	111-84-2	128	6.608	85	2	4
596	1,1,1-Trichloro-2-methyl-2-propanol	C4H7Cl3O	57-15-8	176	8.352	125	2	4
597	Bis(2-ethylhexyl) sebacate	C26H50O4	122-62-3	426	33.093	185	2	4
598	Bis(2-ethylhexyl)phthalate	C24H38O4	117-81-7	390	30.626	149	2	4
599	Butyl benzyl phtalate	C19H20O4	85-68-7	312	28.734	149	2	4
600	Di(2-ethylhexyl)adipate	C22H42O4	103-23-1	370	29.173	129	2	4
601	Dicyclohexyl phthalate	C20H26O4	84-61-7	330	30.473	149	2	4
602	Diethyl phthalate	C14H14O4	84-66-2	246	19.285	149	2	4
603	Di-iso-butyl phthalate	C16H22O4	84-69-5	278	23.06	149	5	10
604	Dimethyl phthalate	C10H10O4	131-11-3	194	17.125	163	2	4
605	Di-n-butyl phthalate	C16H22O4	84-74-2	278	24.272	149	2	4
606	Di-n-hexyl phthalate	C20H30O4	84-75-3	334	28.809	149	2	4
607	Di-n-octyl phthalate	C24H38O4	117-84-0	390	32.49	149	2	4
608	Di-n-pentyl phthalate	C18H26O4	131-18-0	306	26.537	149	2	4
609	Di-n-propyl phthalate	C14H18O4	131-16-8	250	21.833	149	2	4
610	Triethyl phosphate (TEP)	C6H15O4P	78-40-0	182	11.037	155	10	20
611	Tris(3-methylphenyl)phosphate (TMCP)	C21H21O4P	563-04-2	368	31.489	368	10	20
612	Triphenyl phosphate (TPP)	C18H15O4P	115-86-6	326	29.055	326	10	20
613	Tris(2-butoxyethyl)phosphate (TBEP)	C18H39O7P	78-51-3	398	29.065	101	100	200
614	Tris(2-methylphenyl)phosphate (TOCP)	C21H21O4P	78-30-8	368	30.838	368	10	20
615	Tris(4-methylphenyl)phosphate (TPCP)	C21H21O4P	78-32-0	368	32.368	368	10	20
616	a-Damascone	C13H20O	24720-09-0	192	16.01	192	10	20
617	Galaxolide, HHCB	C18H26O	1222-05-5	258	22.701	243	10	20
618	Pseudoionone 1	C13H20O	141-10-6	192	18.187	109	100	200
619	Pseudoionone 2	C13H20O	141-10-6	192	19.014	109	100	200
620	Tonalide, AHTN	C18H26O	21145-77-7	258	22.793	243	10	20
621	Versalide	C18H26O	88-29-9	258	22.019	243	10	20
622	α-Ionone	C13H20O	127-41-3, 6901-97-9	192	16.541	121	10	20
623	β-Damascone	C13H20O	23726-91-2	192	16.324	177	10	20
624	β-Ionone	C13H20O	79-77-6, 14901-07-6	192	17.454	177	10	20
625	γ-Damascone	C13H20O	35087-49-1	192	15.516	192	10	20
626	δ-Damascone	C13H20O	57378-68-4	192	15.72	192	10	20
627	Thymol	C10H14O	89-83-8	150	14.423	135	10	20
628	Triclosan	C12H7Cl3O2	3380-34-5	288	26.118	290	2	4
629	Diethyltoluamide (DEET)	C12H17NO	134-62-3	191	19.082	119	2	4
630	Aspirin	C9H8O4	50-78-2	180	18.809	120	2	4
631	Ethenzamide	C9H11NO2	738-73-8	165	19.472	120	2	4
632	Fenoprofen	C15H14O3	31879-05-7	242	24.838	197	2	4
633	Ibuprofen	C13H18O2	15687-27-1	206	19.685	161	2	4
634	L-Menthol	C10H20O	2216-51-5	156	12.416	95	2	4
635	Mefenamic Acid	C15H15NO2	61-68-7	241	26.625	223	2	4
636	Methapyrilene	C14H19N3S	91-80-5	297	24.982	97	2	4
637	Naproxen	C14H14O3	22204-53-1	230	25.973	185	2	4
638	Nicotine	C10H14N2	54-11-5	162	15.452	84	2	4
639	Phenacetin	C10H13NO2	62-44-2	179	20.855	179	2	4
640	Propyphenazone	C14H18N2O	479-92-5	230	24.306	215	2	4
641	Benzophenone	C13H10O	119-61-9	182	19.786	105	2	4
642	4-n-Heptylphenol	C13H20O	1987-50-4	192	20.375	107	2	4
643	4-n-Hexylphenol	C12H18O	2446-69-7	178	18.846	107	2	4
644	4-n-Pentylphenol	C11H16O	14938-35-3	164	17.247	107	2	4
645	4-sec-Butylphenol	C10H14O	99-71-8	150	14.781	121	2	4
646	1-Naphthylamine	C10H9N	134-32-7	143	18.546	143	2	4
647	2,3-Dichloroaniline	C6H5Cl2N	608-27-5	161	15.474	161	5	10
648	2,3-Dichlorophenol	C6H4Cl2O	576-24-9	162	12.284	162	2	4
649	2,4,6-Tribromoaniline	C6H4Br3N	147-82-0	327	21.007	331	5	10
650	2,6-Dibromo-4-chloroaniline	C6H4Br2ClN	874-17-9	283	19.47	285	5	10
651	2-Acetylaminofluorene	C15H13NO	53-96-3	223	29.22	181	2	4
652	2-Bromo-4,6-dichloroaniline	C6H4BrCl2N	697-86-9	239	17.984	241	5	10
653	2-Naphthylamine	C10H9N	91-59-8	143	18.796	143	2	4
654	3,5-Dichlorophenol	C6H4Cl2O	591-35-5	162	16.059	162	2	4
655	4-Aminobiphenyl	C12H11N	92-67-1	169	21.672	169	2	4
656	4-Bromo-2,6-dichloroaniline	C6H4BrCl2N	697-86-9	239	18.077	241	5	10
657	4-Bromophenylphenyl ether	C12H9BrO	101-55-3	248	20.917	248	2	4
658	4-Dimethylaminoazobenzene	C14H15N3	60-11-7	225	27.508	225	2	4
659	Ethyl methanesulfonate	C3H8O3S	62-50-0	124	7.214	109	2	4
660	Ethylcarbamate	C3H7NO2	51-79-6	89	4.936	62	2	4
661	N-Nitroquinoline-N-oxide	C9H6N2O3	56-57-5	190	24.541	190	2	4
662	N-Nitroso-di-n-butylamine	C8H18N2O	924-16-3	158	13.924	84	2	4
663	N-Nitrosopiperidine	C5H10N2O	100-75-4	114	11.011	114	2	4
664	N-Nitrosopyrrolidine	C4H8N2O	930-55-2	100	10.094	100	2	4
665	2,4-Dichlorophenol	C6H4Cl2O	120-83-2	162	12.146	162	2	4
666	2,4,6-Trichloroaniline	C6H4Cl3N	634-93-5	195	16.469	195	5	10
667	2,4-Dichloroaniline	C6H5Cl2N	554-00-7	161	15.134	161	2	4
668	Caffeine	C8H10N4O2	58-08-2	194	22.849	194	2	4
669	2-Hydroxy-4-methoxy-4'-methyl-benzophenone	C15H14O4	1641-17-4	258	26.782	241	2	4
670	1,3,5-Trinitrobenzene	C6H3N3O6	99-35-4	213	20.702	213	2	4
671	2-Mercaptobenzothiazole	C7H5NS2	149-30-4	167	24.41	167	2	4
672	1,2,3-Trimethoxybenzene	C9H12O3	634-36-6	168	14.727	168	5	10
673	2-Bromochlorobenzene	C6H4BrCl	694-80-4	190	11.299	192	5	10
674	2,4,6-Tri-tert-butylphenol	C18H30O	732-26-3	262	19.322	247	2	4
675	2,4,6-Trichlorophenol	C6H3Cl3O	88-06-2	196	15.489	196	2	4
676	2,6-Dichlorophenol	C6H4Cl2O	87-65-0	162	12.825	162	2	4
677	2-Chlorophenol	C6H5ClO	95-57-8	128	8.485	128	2	4
678	3-&4-Chlorophenol	C6H5ClO	108-43-0&106-48-9	128	12.621	128	4	8
679	4-n-Nonylphenol	C15H24O	104-40-5	220	23.209	107	2	4
680	2,4,6-Trinitrotoluene	C7H5N3O6	118-96-7	227	20.789	210	2	4
681	2,4-Diamino-6-nitrotoluene	C7H9N3O2	6629-29-4	167	23.55	167	20	40
682	2,6-Diamino-4-nitrotoluene	C7H9N3O2	59229-75-3	167	24.569	167	20	40
683	2-Amino-4,6-dinitrotoluene	C7H7N3O4	35572-78-2	197	24.467	180	2	4
684	4-Amino-2,6-dinitrotoluene	C7H7N3O4	19406-51-0	197	23.823	180	2	4
685	Tetryl	C7H5N5O8	479-45-8	287	25.588	194	2	4
686	Longifolene	C15H24	475-20-7	204	16.63	161	5	10
687	Dibenzofuran	C12H8O	132-64-9	168	18.304	168	2	4
688	Biphenyl	C12H10	92-52-4	154	16.06	154	5	10
689	1-Naphthol	C10H8O	90-15-3	144	18.104	144	2	4
690	2,4-Dinitroaniline	C6H5N3O4	97-02-9	183	24.127	183	2	4
691	2-Amino-6-nitrotoluene	C7H8N2O2	603-83-8	152	18.194	152	2	4
692	2-Anisidine	C7H9NO	90-04-0	123	12.31	123	5	10
693	2-Chloroaniline	C6H6cLN	95-51-2	127	11.395	127	2	4
694	2-Methylaniline	C7H9N	95-53-4	107	10.247	106	2	4
695	3,3'-Dichlorobenzidine	C12H10Cl2N2	91-94-1	252	30.089	252	5	10
696	3,5-Dimethylaniline	C8H11N	108-69-0	121	12.341	121	5	10
697	3-Anisidine	C7H9NO	536-90-3	123	13.493	123	5	10
698	3-Toluidine	C7H9N	108-44-1	107	10.39	106	5	10
699	4-Amino-2-nitrotoluene	C7H8N2O2	119-32-4	152	18.584	152	2	4
700	4-Anisidine	C7H9NO	104-94-9	123	13.137	108	5	10
701	5-Chloro-2-methyl aniline	C7H8ClN	95-79-4	141	14.599	106	5	10
702	5-Nitro-o-toluidine	C7H8N2O2	99-55-8	152	19.431	152	2	4
703	Benzanthrone	C17H10O	82-05-3	230	30.433	230	5	10
704	Benzidine	C12H12N2	92-87-5	184	26.31	184	15	30
705	m-Aminophenol	C6H7NO	591-27-5	109	14.229	109	2	4
706	m-Phenylenediamine	C6H8N2	108-45-2	108	14.452	108	2	4
707	N,N-Dimethylaniline	C8H11N	121-69-7	121	10.636	120	5	10
708	N-Ethylaniline	C8H11N	103-69-5	121	11.426	106	5	10
709	Quinoline, 2,7-dimethyl-	C11H11N	93-37-8	287	16.76	157	2	4
710	Triphenylmethane	C19H16	519-73-3	244	24.909	244	2	4
711	Diphenylamine	C12H11N	122-39-4	169	19.82	169	2	4
712	3,4-Dichloroaniline	C6H5Cl2N	95-76-1	161	16.793	161	5	10
713	4-Chloroaniline	C6H6ClN	106-47-8	127	12.817	127	5	10
714	p-Phenylenediamine	C6H8N2	106-50-3	108	13.893	108	2	4
715	e-Caprolactam	C6H11NO	105-60-2	113	13.753	113	2	4
716	4-n-Butylphenol	C10H14O	1638-22-8	150	15.584	107	2	4
717	Pentachlorobenzene	C6HCl5	608-93-5	248	18.192	250	2	4
718	Nicotinonitrile	C6H4N2	100-54-9	104	8.96	104	2	4
719	2,5-Dichlorophenol	C6H4Cl2O	583-78-8	162	12.196	162	2	4
720	2,3,4-Trichlorophenol	C6H3Cl3O	15950-66-0	196	15.724	196	2	4
721	2,3,5-Trichlorophenol	C6H3Cl3O	933-78-8	196	15.136	196	2	4
722	2,4,5-Trichlorophenol	C6H3Cl3O	95-95-4	196	15.562	196	2	4
723	2,6-Dimethylphenol	C8H10O	576-26-1	122	10.973	122	2	4
724	3- & 4-tert-Butylphenol	C10H14O	585-34-2&98-54-4	150	14.425	135	2	4
725	4,4'-Methylene-bis(2-chloroaniline)	C13H12Cl2N2	101-14-4	266	30.15	266	5	10
726	Dicyclopentadiene	C10H12	77-73-6	132	9.375	66	5	10
727	Dimethylterephthalate	C10H10O4	120-61-6	194	17.917	163	5	10
728	n-Butylacrylate	C7H12O2	141-32-2	128	6.495	73	2	4
729	3-Methoxy-1-butyl acetate	C7H14O3	4435-53-4	146	8.302	71	2	4
730	1,2,4,5-Tetrachlorobenzene	C6H2Cl4	95-94-3	214	15.135	216	2	4
731	1,2-Dibromo-3-chloropropane	C3H5Br2Cl	96-12-8	234	10.665	157	2	4
732	1,3-Dinitrobenzene	C6H4N2O4	99-65-0	168	17.085	168	2	4
733	1,4-Dinitrobenzene	C6H4N2O4	100-25-4	168	16.886	168	2	4
734	2,3-&3,4-Dimethylaniline	C8H11N	87-59-2&95-64-7	121	12.765	121	10	20
735	2,3-Dichloronitrobenzene	C6H3Cl2NO2	3209-22-1	191	16.224	191	5	10
736	2,4-Dichloronitrobenzene	C6H3Cl2NO2	611-06-3	191	15.866	191	2	4
737	2,4-Dimethylphenol	C8H10O	105-67-9	122	11.714	107	2	4
738	2,4-Dinitrophenol	C6H4N2O5	51-28-5	184	17.963	184	2	4
739	2,4-Dinitrotoluene	C7H6N2O4	121-14-2	182	18.391	165	5	10
740	2,5-Dichloronitrobenzene	C6H3Cl2NO2	89-61-2	191	15.722	191	2	4
741	2,6-Diaminotoluene	C7H10N2	823-40-5	122	16.056	122	2	4
742	2,6-Dimethylaniline	C8H11N	87-62-7	121	12.15	121	2	4
743	2,6-Dinitrotoluene	C7H6N2O4	606-20-2	182	17.217	165	2	4
744	2-Naphthol	C10H8O	135-19-3	144	18.266	144	2	4
745	2-Nitroaniline	C6H6N2O2	88-74-4	138	16.401	138	2	4
746	2-Nitroanisole	C7H7NO3	91-23-6	153	15.42	123	5	10
747	2-Nitrotoluene	C7H7NO2	88-72-2	137	12.042	120	2	4
748	2-sec-Butylphenol	C10H14O	89-72-5	150	14.133	121	2	4
749	2-tert-Butylphenol	C10H14O	88-18-6	150	14.048	135	2	4
750	3-&4-Nitroanisole	C7H7NO3	555-03-3&100-17-4	153	14.989	153	2	4
751	3,4-Dichlorophenol	C6H4Cl2O	95-77-2	162	16.459	162	2	4
752	3,5-Dimethylphenol	C8H10O	108-68-9	122	12.144	122	5	10
753	3-Chloronitrobenzene	C6H4ClNO2	121-73-3	157	13.338	157	2	4
754	3-Nitroaniline	C6H6N2O2	99-09-2	138	17.646	138	2	4
755	3-Nitrotoluene	C7H7NO2	99-08-1	137	12.758	137	2	4
756	4-Chloro-2-nitroaniline	C6H5ClN2O2	89-63-4	172	19.438	172	5	10
757	4-Chloronitrobenzene	C6H4ClNO2	100-00-5	157	13.625	157	2	4
758	4-Nitroaniline	C6H6N2O2	100-01-6	138	19.449	138	2	4
759	4-Nitrotoluene	C7H7NO2	99-99-0	137	13.115	137	2	4
760	4-Phenylphenol	C12H10O	92-69-3	170	21.108	170	2	4
761	Benzyl chloride	C7H7Cl	100-44-7	126	9.072	91	2	4
762	Bis(2-chloroethoxy)methane	C5H10Cl2O2	111-91-1	172	12.04	93	2	4
763	Carbazole	C12H9N	86-74-8	167	22.895	167	5	10
764	Dibutylamine	C8H19N	111-92-2	129	7.93	86	2	4
765	Hexachlorocyclopentadiene	C5Cl6	77-47-4	270	15.141	237	2	4
766	Hexachloroethane	C2Cl6	67-72-1	234	10.389	201	2	4
767	Nitrobenzene	C6H5NO2	98-95-3	123	10.588	123	2	4
768	N-Methylaniline	C7H9N	100-61-8	107	10.148	106	5	10
769	Phenothiazine	C12H9NS	92-84-2	199	25.561	199	2	4
770	Quinoline	C9H7N	91-22-5	129	13.55	129	5	10
771	4-Nitrophenol	C6H5NO3	100-02-7	139	18.261	139	2	4
772	1,2,3-Trichlorobenzene	C6H3Cl3	87-61-6	180	13.011	180	5	10
773	1,2,4-Trichlorobenzene	C6H3Cl3	120-82-1	180	12.41	180	2	4
774	1,3,5-Trichlorobenzene	C6H3Cl3	108-70-3	180	11.514	182	5	10
775	Bis(2-chloroethyl)ether	C4H8Cl2O	111-44-4	142	8.482	93	2	4
776	3-Methylpyridine	C6H7N	108-99-6	93	5.672	93	2	4
777	2,5-Dimethylaniline	C8H11N	95-78-3	121	12.272	121	5	10
778	2,3,6-Trichlorophenol	C6H3Cl3O	933-75-5	196	16.026	196	2	4
779	3,4,5-Trichlorophenol	C6H3Cl3O	609-19-8	196	19.695	196	2	4
780	Cyclohexanamine, N-cyclohexyl-	C12H23N	101-83-7	181	16.69	138	2	4
781	1,2-Dimethylnaphthalene	C12H12	573-98-8	156	17.297	141	5	10
782	1,3-Dimethylnaphthalene	C12H12	575-41-7	156	16.733	156	5	10
783	1,4-&2,3-Dimethylnaphthalene	C12H12	571-58-4&581-40-8	156	17.061	156	10	20
784	1,8-Dimethylnaphthalene	C12H12	569-41-5	156	17.642	156	5	10
785	1-Methylphenanthrene	C15H12	832-69-9	192	24.054	192	2	4
786	1-Nitronaphthalene	C10H7NO2	86-57-7	173	20.233	173	2	4
787	1-Nitropyrene	C16H9NO2	5522-43-0	247	31.498	247	2	4
788	1-Phenylnaphthalene	C16H12	605-02-7	204	23.138	204	5	10
789	2,3-Benzofluorene	C17H12	243-17-4	216	27.652	216	5	10
790	2,6-Diisopropylnaphthalene	C16H20	24157-81-1	212	21.326	197	5	10
791	2,6-Dimethylnaphthalene	C12H12	581-42-0	156	16.502	156	5	10
792	2-Isopropylnaphthalene	C13H14	2027-17-0	170	17.31	155	5	10
793	2-Methylnaphthalene	C11H10	91-57-6	142	14.621	142	2	4
794	2-Methylphenanthrene	C15H12	2531-84-2	192	23.752	192	2	4
795	2-Nitronaphthalene	C10H7NO2	581-89-5	173	19.593	173	2	4
796	2-Phenylnaphthalene	C16H12	612-94-2	204	24.621	204	5	10
797	3,6-Dimethylphenanthrene	C16H14	1576-67-6	206	25.058	206	5	10
798	3-Methylcholanthrene	C21H16	56-49-5	268	34.714	268	2	4
799	3-Nitrofluoranthene	C16H9NO2	892-21-7	247	30.94	247	2	4
800	3-Nitrophenanthrene	C14H9NO2	17024-19-0	223	27.949	223	2	4
801	4,5-Methylene-phenanthrene	C15H10	203-64-5	190	23.936	189	5	10
802	4-Nitrophenanthrene	C14H9NO2	82064-15-1	223	27.405	223	2	4
803	6-Nitrochrysene	C18H11NO2	7496-02-8	273	34.07	273	2	4
804	7,12-Dimethylbenz(a)anthracene	C20H16	57-97-6	256	33.017	256	2	4
805	7-Nitrobenz(a)anthracene	C18H11NO2	20268-51-3	273	33.275	273	2	4
806	9-Nitroanthracene	C14H9NO2	602-60-8	223	26.538	223	2	4
807	9-Nitrophenanthrene	C14H9NO2	954-46-1	223	26.48	165	2	4
808	Acenaphthene	C12H10	83-32-9	154	17.771	153	2	4
809	Acenaphthylene	C12H8	208-96-8	152	17.237	152	2	4
810	Anthracene	C14H10	120-12-7	178	22.316	178	2	4
811	Benzo(a)anthracene	C18H12	56-55-3	228	29.997	228	2	4
812	Benzo(a)pyrene	C20H12	50-32-8	252	33.797	252	2	4
813	Benzo(c)phenenthrene	C18H12	195-19-7	228	29.375	228	2	4
814	Benzo(e)pylene	C20H12	192-97-2	252	33.664	252	5	10
815	Benzo(ghi)perylene	C22H12	191-24-2	276	37.056	276	2	4
816	Benzo(j&b)fluoranthene	C20H12	205-82-3&205-99-2	252	33.005	252	4	8
817	Benzo(k)fluoranthene	C20H12	207-08-9	252	33.064	252	2	4
818	Chrysene & Triphenylene	C18H12	218-01-9&217-59-4	228	30.094	228	2	4
819	Dibenzo(a,h)anthracene	C22H14	53-70-3	278	36.532	278	2	4
820	Diphenylmethane	C13H12	101-81-5	168	16.909	167	5	10
821	Fluoranthene	C16H10	206-44-0	202	25.721	202	2	4
822	Fluorene	C13H10	86-73-7	166	19.326	166	2	4
823	Indeno(1,2,3-cd)pyrene	C22H12	193-39-5	276	36.435	276	2	4
824	Naphthalene	C10H8	91-20-3	128	12.573	128	2	4
825	Perylene	C20H12	198-55-0	252	33.999	252	5	10
826	Phenanthrene	C14H10	85-01-8	178	22.166	178	2	4
827	Pyrene	C16H10	129-00-0	202	26.362	202	2	4
828	Isophorone	C9H14O	78-59-1	138	11.301	82	5	10
829	PCB #1	2-	2051-60-7	188	17.984	188	2	4
830	PCB #101	22'455'-	37680-73-2	324	26.282	326	2	4
831	PCB #104	22'466'-	56558-16-8	324	24.524	326	2	4
832	PCB #105	233'44'-	32598-14-4	324	28.342	326	2	4
833	PCB #110	233'4'6-	38380-03-9	324	27.111	326	2	4
834	PCB #114	2344'5-	74472-37-0	324	27.991	326	2	4
835	PCB #118	23'44'5-	31508-00-6	324	27.758	326	2	4
836	PCB #119	23'44'6-	56558-17-9	324	26.518	326	2	4
837	PCB #123	2'344'5-	65510-44-3	324	27.667	326	2	4
838	PCB #126	33'44'5-	57465-28-8	324	29.113	326	2	4
839	PCB #128	2,2',3,3',4,4'-	38380-07-3	358	29.468	360	2	4
840	PCB #138&158	22'344'5'-&233'44'6-	35065-28-2&74472-42-7	358	28.886	360	4	8
841	PCB #149	22'34'5'6-	38380-04-0	358	27.653	360	2	4
842	PCB #15	44'-	2050-68-2	222	22.242	222	2	4
843	PCB #151	22'355'6-	52663-63-5	358	27.374	360	2	4
844	PCB #153&168	22'44'55'-&23'44'5'6-	35065-27-1&41411-63-6	358	28.251	360	4	8
845	PCB #155	22'44'66'-	33979-03-2	358	26.013	360	2	4
846	PCB #156	233'44'5-	38380-08-4	358	30.027	360	2	4
847	PCB #157	233'44'5'-	69782-90-7	358	30.132	360	2	4
848	PCB #167	23'44'55'-	52663-72-6	358	29.528	360	2	4
849	PCB #169	33'44'55'-	32774-16-6	358	30.875	360	2	4
850	PCB #170	22'33'44'5-	35065-30-6	392	31.008	324	2	4
851	PCB #171	22'33'44'6-	52663-71-5	392	29.956	394	2	4
852	PCB #177	22'33'4'56-	52663-70-4	392	29.848	324	2	4
853	PCB #178	22'33'55'6-	52663-67-9	392	28.994	394	2	4
854	PCB #18	22'5-	37680-65-2	256	22.085	256	2	4
855	PCB #180	22'344'55'-	35065-29-3	392	30.381	324	2	4
856	PCB #183	22'344'5'6-	52663-69-1	392	29.324	394	2	4
857	PCB #187	22'34'55'6-	52663-68-0	392	29.196	394	2	4
858	PCB #188	22'34'566'-	74487-85-7	392	28.032	394	2	4
859	PCB #189	233'44'55'-	36935-31-9	392	31.665	394	2	4
860	PCB #19	22'6-	38444-73-4	256	21.46	256	2	4
861	PCB #191	233'44'5'6-	74472-50-7	392	30.486	394	2	4
862	PCB #194	22'33'44'55'-	35694-08-7	426	32.396	358	2	4
863	PCB #199	22'33'455'6'-	52663-75-9	426	31.162	358	2	4
864	PCB #201	22'33'45'66'-	40186-71-8	426	30.084	430	2	4
865	PCB #202	22'33'55'66'-	2136-99-4	426	29.9	430	2	4
866	PCB #205	233'44'55'6-	74472-53-0	426	32.476	358	2	4
867	PCB #206	22'33'44'55'6-	40186-72-9	460	33.149	392	2	4
868	PCB #208	22'33'455'66'-	52663-77-1	460	31.889	392	2	4
869	PCB #209	22'33'44'55'66'-	2051-24-3	494	33.791	498	2	4
870	PCB #22	234'-	38444-85-8	256	23.741	256	2	4
871	PCB #28	244'-	7012-37-5	256	23.334	256	2	4
872	PCB #3	4-	2051-62-9	188	19.253	188	2	4
873	PCB #33	2'34-	38444-86-9	256	23.536	256	2	4
874	PCB #37	344'-	38444-90-5	256	24.82	258	2	4
875	PCB #4&10	22'-&26-	13029-08-8&33146-45-1	222	19.771	222	4	8
876	PCB #44	22'35'-	41464-39-5	290	24.662	292	2	4
877	PCB #49	22'45'-	41464-40-8	290	24.282	292	2	4
878	PCB #52	22'55'-	35693-99-3	290	24.19	292	2	4
879	PCB #54	22'66'-	15968-05-5	290	22.905	292	2	4
880	PCB #70	23'4'5-	32598-11-1	290	25.672	292	2	4
881	PCB #74	244'5-	32690-93-0	290	25.562	292	2	4
882	PCB #77	33'44'-	32598-13-3	290	27.18	292	2	4
883	PCB #8	24'-	34883-43-7	222	20.977	222	2	4
884	PCB #81	344'5-	70362-50-4	290	26.937	292	2	4
885	PCB #87	22'345'-	38380-02-8	324	26.904	326	2	4
886	PCB #95	22'35'6-	38379-99-6	324	25.705	326	2	4
887	PCB #99	22'44'5-	38380-01-7	324	26.388	326	2	4
888	1,2,3,4,5,6,7-Heptachloronaphthalene	C10HCl7	58863-14-2	366	31.005	368	2	4
889	1,2,3,4,5,6,8-Heptachloronaphthalene	C10HCl7	58863-15-3	366	31.163	368	2	4
890	1,2,3,4,5,8-Hexachloronaphthalene	C10H2Cl6		332	29.555	334	2	4
891	1,2,3,4,6,7-Hexachloronaphthalene	C10H2Cl6	103426-96-6	332	28.295	334	2	4
892	1,2,3,5,7,8-Hexachloronaphthalene	C10H2Cl6	103426-94-4	332	28.722	334	2	4
893	1,2,3,5,7-Pentachloronaphthalene	C10H3Cl5	53555-65-0	298	25.77	300	2	4
894	1,2,3,5,8-&1,2,3,6,8-Pentachloronaphthalene	C10H3Cl5		298	26.922	300	2	4
895	1,2,3,5-Tetrachloronaphthalene	C10H4Cl4	53555-63-8	264	24.113	266	2	4
896	1,2,3-Trichloronaphthalene	C10H5Cl3	50402-52-3	230	21.981	230	2	4
897	1,2,4,5,6,8-&1,2,4,5,7,8-Hexachloronaphthalene	C10H2Cl6	90948-28-0& 103426-92-2	332	28.857	334	2	4
898	1,2,4,5,6-Pentachloronaphthalene	C10H3Cl5	150224-20-7	298	26.729	300	2	4
899	1,2,4,5,8-Pentachloronaphthalene	C10H3Cl5	150224-25-2	298	27.149	300	2	4
900	1,2,4,6,8-Pentachloronaphthalene	C10H3Cl5		298	26.154	300	2	4
901	1,2,4,7,8-Pentachloronaphthalene	C10H3Cl5	150205-21-3	298	26.842	300	2	4
902	1,2,5,7-&1,2,4,6-&1,2,4,7-Tetrachloronaphthalene	C10H4Cl4	67922-23-0&51570-45-7&67922-21-8	264	23.537	266	2	4
903	1,2,5,8-&1,2,6,8-Tetrachloronaphthalene	C10H4Cl4	&67922-24-1	264	24.817	266	2	4
904	1,3,7-&1,4,6-Trichloronaphthalene	C10H5Cl3	55720-37-1&2737-54-9	230	21.343	230	2	4
905	1,4-&1,6-Dichloronaphthalene	C10H6Cl2	1825-31-6&2050-72-8	196	18.856	196	2	4
906	1,4,5,8-Tetrachloronaphthalene	C10H4Cl4	3432-57-3	264	25.256	266	2	4
907	1,4,5-Trichloronaphthalene	C10H5Cl3	2437-55-0	230	22.37	230	2	4
908	1,4,6,7-Tetrachloronaphthalene	C10H4Cl4	55720-43-9	264	23.843	266	2	4
909	1,5-Dichloronaphthalene	C10H6Cl2	1825-30-5	196	18.911	196	2	4
910	1-Chloronaphthalene	C10H7Cl	90-13-1	162	16.029	162	2	4
911	2,3,6,7-&1,2,4,8-Tetrachloronaphthalene	C10H4Cl4	34588-40-4& 6529-87-9	264	24.598	266	2	4
912	2,6-&1,7-Dichloronaphthalene	C10H6Cl2	2065-70-5&2050-73-9	196	19.021	196	2	4
913	2-Chloronaphthalene	C10H7Cl	91-58-7	162	15.971	162	2	4
914	Octachloronaphthalene	C10Cl8	2234-13-1	400	33.127	404	2	4
915	2,3,4,5,6-Pentachloro-p-terphenyl	C18H9Cl5	61577-01-3	400	35.132	402	2	4
916	2,3,5,6-Tetrachloro-p-terphenyl	C18H10Cl4	61576-99-6	366	33.137	368	2	4
917	2,4-&2,5-Dichloro-p-terphenyl	C18H12Cl2	61576-83-8 & 61576-86-1	298	30.315	298	4	8
918	2,4,4',6-Tetrachloro-p-terphenyl	C18H10Cl4	61576-97-4	366	33.245	368	2	4
919	2,4,6-Trichloro-p-terphenyl	C18H11Cl3	57346-61-9	332	31.034	332	2	4
920	2,5-Dichloro-o-terphenyl	C18H12Cl2	61577-02-4	298	26.504	228	2	4
921	4-Chloro-o-terphenyl	C18H13Cl	21711-54-6	264	25.897	229	2	4
922	4-Chloro-p-terphenyl	C18H13Cl	1762-83-0	264	29.537	264	2	4
923	Tris(4-chlorophenyl)methane	C19H13Cl3	27575-78-6	348	32.007	311	2	4
924	2-Methyl-4,6-dinitrophenol	C7H6N2O5	534-52-1	198	19.555	198	2	4
925	Cyclopentanone, 2-methyl-	C6H10O	1120-72-5	98	5.228	98	2	4
926	Safrole	C10H10O2	94-59-7	162	14.478	162	2	4
927	4-Methyl-3-nitrophenol	C7H7NO3	2042-14-0	153	18.368	136	2	4
928	5-Bromoindole	C8H6BrN	10075-50-0	195	20.153	195	2	4
929	Diphenyldisulfide	C12H10S2	882-33-7	218	22.826	218	5	10
930	Phenazine	C12H8N2	92-82-0	180	21.558	180	2	4
931	Phenoxathiin	C12H8OS	262-20-4	200	22.031	200	2	4
932	Phenoxazine	C12H9NO	135-67-1	183	23.125	183	2	4
933	2-Chloro-6-methylphenol	C7H7ClO	87-64-9	142	10.424	107	2	4
934	2-Methylbenzothiazole	C8H7NS	120-75-2	149	14.589	149	5	10
935	3-Bromochlorobenzene	C6H4BrCl	108-37-2	190	10.774	192	5	10
936	3-Hexanol, 4-ethyl-	C8H18O	19780-44-0	130	8.091	59	2	4
937	Pentamethylbenzene	C11H16	700-12-9	148	14.276	133	5	10
938	Tris(4-chlorophenyl)methanol	C19H13Cl3O	3010-80-8	364	33.296	251	2	4
939	1,2-Dichlorobenzene	C6H4Cl2	95-50-1	146	9.493	146	2	4
940	1,3-Dichloro-2-propanol	C3H6Cl2O	96-23-1	128	6.566	79	2	4
941	1-Acetoxy-2-methoxyethane	C5H10O3	110-49-6	118	5.161	58	2	4
942	2-Butoxyethanol	C6H14O2	111-76-2	118	6.667	57	2	4
943	4-Cymene	C10H14	99-87-6	134	9.327	119	5	10
944	Benzyl alcohol	C7H8O	100-51-6	108	9.476	108	2	4
945	Dibenzyl ether	C14H14O	103-50-4	198	20.259	91	5	10
946	Hexachlorobutadiene	C4Cl6	87-68-3	258	13.045	225	2	4
947	Hexachloropropylene	C3Cl6	1888-71-7	246	12.878	213	2	4
948	N-Ethylmorpholine	C6H13NO	100-74-3	115	6.1	100	2	4
949	Pentachloroethane	C2HCl5	197-61-7	200	8.35	167	2	4
950	trans-Decahydronaphthalene	C10H18	493-02-7	138	10.073	138	5	10
951	Trimethyl phosphate	C3H9O4P	512-56-1	140	7.228	110	10	20
952	1,3-Dichlorobenzene	C6H4Cl2	541-73-1	146	8.922	146	2	4
953	N-Nitrosomorpholine	C4H8N2O2	59-89-2	116	10.232	116	2	4
954	m-Terphenyl	C18H14	92-06-8	230	26.713	230	2	4
955	o-Terphenyl	C18H14	84-15-1	230	23.459	230	2	4
956	p-Terphenyl	C18H14	92-94-4	230	27.147	230	2	4
957	1,2,4,5-Tetrabromobenzene	C6H2Br4	636-28-2	390	21.488	394	10	20
958	Fucosterol	C29H48O	17605-67-3	412	37.886	314	20	40
959	Cholestanol	C27H48O	80-97-7	388	35.979	233	20	40
960	Coprostanone	C27H46O	15600-08-5	386	36.077	316	10	20
961	24-Ethyl coprostanol	C29H52O	4736-91-8	416	37.56	215	40	80
962	Coprostanol	C27H48O	360-68-9	388	35.58	233	10	20
963	Epicoprostanol	C27H48O	516-92-7	388.67	35.764	370	10	20
964	Cholestane	C27H48	481-21-0	372	33.645	217	20	40
965	beta-Sitosterol	C29H50O	83-46-5	414	37.704	414	20	40
966	Campesterol	C28H48O	474-62-4	400	37.018	400	20	40
967	Stigmasterol	C29H48O	83-48-7	412	37.077	412	20	40
968	Ergosterol	C28H44O	57-87-4	396	36.794	363	40	80
969	Cholesterol	C27H46O	57-88-5	386	35.879	386	20	40
*: Instrument detection limit when injecting 1 mL.
**: Method detection limit when concentrating 500 mL of sample water to 1 mL.

## Sheet: Table S3
Table S3 Chemicals analyzed by AIQS with LC-QTOFMS
No.	Compound	Formula	CAS RN	m/z (Quantitation ion)	m/z (Qualifier ion 1)	m/z (Qualifier ion 2)	IDL* (pg)	MDL** (ng/L)
1	(E)-Fenpyroximate	C24H27N3O4	134098-61-6	422.207	366.145	135.044	0.2	0.25
2	Anilofos	C13H19ClNO3PS2	64249-01-0	368.031	124.982	170.97	0.00606061	0.00757576
3	Asulam	C8H10N2O4S	3337-71-1	231.043	108.044	156.012	1.5	1.875
4	Azamethiphos	C9H10ClN2O5PS	35575-96-3	324.981	182.996	111.995	0.0606061	0.0757576
5	Azimsulfuron	C13H16N10O5S	120162-55-2	425.11	182.056	156.077	0.0606061	0.0757576
6	Azinphos-methyl	C10H12N3O3PS2	86-50-0	318.013	132.044	77.0385	0.6	0.75
7	Bensulfuron-methyl	C16H18N4O7S	83055-99-6	411.097	149.06	182.056	0.30303	0.378788
8	Benzofenap	C22H20Cl2N2O3	82692-44-2	431.092	105.07	139.05	0.30303	0.378788
9	Bromacil	C9H13BrN2O2	314-40-9	261.023	206.959	204.961	0.6	0.75
10	Carbosulfan	C20H32N2O3S	55285-14-8	381.221	118.069	128.143	0.030303	0.0378788
11	Carpropamid	C15H18Cl3NO	104030-54-8	334.053	139.031	103.054	0.0606061	0.0757576
12	Chloridazon	C10H8ClN3O	1698-60-8	222.043	77.0385	104.049	0.151515	0.189394
13	Chlorimuron-ethyl	C15H15ClN4O6S	90982-32-4	415.047	186.006	184.99	0.0606061	0.0757576
14	Chlorsulfuron	C12H12ClN5O4S	64902-72-3	358.037	141.077	167.057	0.151515	0.189394
15	Chromafenozide	C24H30N2O3	143807-66-3	395.233	175.076	133.065	0.030303	0.0378788
16	Cinosulfuron	C15H19N5O7S	94593-91-6	414.108	157.072	183.051	0.030303	0.0378788
17	Clodinafop acid	C14H11ClFNO4	114420-56-3	312.043	266.038	91.0543	0.151515	0.189394
18	Clomeprop	C16H15Cl2NO2	84496-56-0	324.055	120.081	148.076	0.0606061	0.0757576
19	Cloquintocet-mexyl	C18H22ClNO3	99607-70-2	336.136	192.021	179.013	0.0606061	0.0757576
20	Cloransulam-methyl	C15H13ClFN5O5S	147150-35-4	430.038	369.981	306.019	0.0606061	0.0757576
21	Cumyluron	C17H19ClN2O	99485-76-4	303.126	125.015	91.0542	0.0606061	0.0757576
22	Cyclanilide	C11H9Cl2NO3	113136-77-9	274.003	113.023	161.987	0.30303	0.378788
23	Cycloate	C11H21NOS	1134-23-2	216.142	55.0541	83.0855	30	37.5
24	Cyclosulfamuron	C17H19N5O6S	136849-15-5	422.113	218.023	261.029	0.0606061	0.0757576
25	Cyflufenamid	C20H17F5N2O2	180409-60-3	413.128	241.04	223.023	0.0606061	0.0757576
26	Daimuron	C17H20N2O	42609-52-9	269.165	119.085	151.087	0.030303	0.0378788
27	Diallate	C10H17Cl2NOS	2303-16-4	270.048	86.0597	108.961	3.0303	3.78788
28	Diclomezine	C11H8Cl2N2O	62865-36-5	255.009	141.034	158.976	3.0303	3.78788
29	Diclosulam	C13H10Cl2FN5O3S	145701-21-9	405.994	160.98	162.977	0.151515	0.189394
30	Dimethirimol	C11H19N3O	5221-53-4	210.16	71.0605	140.107	1.5	1.875
31	Ethametsulfuron-methyl	C15H18N6O6S	97780-06-8	411.108	168.052	196.083	0.0606061	0.0757576
32	Ethoxysulfuron	C15H18N4O7S	126801-58-9	399.097	218.023	261.029	0.0151515	0.0189394
33	Fenoxaprop-ethyl	C18H16ClNO5	66441-23-4	362.079	288.042	121.065	0.0606061	0.0757576
34	Ferimzone	C15H18N4	89269-64-7	255.16	124.088	132.081	0.30303	0.378788
35	Flazasulfuron	C13H12F3N5O5S	104040-78-0	408.058	182.056	139.05	0.0606061	0.0757576
36	Florasulam	C12H8F3N5O3S	145701-23-1	360.037	129.039	128.031	0.151515	0.189394
37	Fluazifop	C15H12F3NO4	69335-91-7	328.079	282.074	238.048	0.6	0.75
38	Flumetsulam	C12H9F2N5O2S	98967-40-9	326.052	129.039	262.09	0.0606061	0.0757576
39	Fluridone	C19H14F3NO	59756-60-4	330.11	310.104	290.098	0.030303	0.0378788
40	Fluroxypyr	C7H5Cl2FN2O3	69377-81-7	254.973	180.973	182.97	0.6	0.75
41	Fomesafen	C15H10ClF3N2O6S	72178-02-0	456.024	343.993	222.977	0.151515	0.189394
42	Foramsulfuron	C17H20N6O7S	173159-57-4	453.119	182.056	255.044	0.0606061	0.0757576
43	Furametpyr	C17H20ClN3O2	123572-88-3	334.132	157.016	159.013	0.30303	0.378788
44	Halosulfuron-methyl	C13H15ClN6O7S	100784-20-1	435.048	182.056	183.059	0.30303	0.378788
45	Haloxyfop	C15H11ClF3NO4	69806-34-4	362.04	316.034	318.032	0.6	0.75
46	Imazaquin	C17H17N3O3	81335-37-7	312.134	199.051	252.077	0.030303	0.0378788
47	Indanofan	C20H17ClO3	133220-30-1	341.094	175.075	187.075	3.0303	3.78788
48	Iodosulfuron-methyl	C14H14IN5O6S	185119-76-0	507.978	167.056	141.077	0.0606061	0.0757576
49	Isoxaflutole	C15H12F3NO4S	141112-29-0	360.051	250.999	252.002	0.30303	0.378788
50	Lactofen	C19H15ClF3NO7	77501-63-4	479.083	343.993	222.977	0.0606061	0.0757576
51	Mesosulfuron methyl	C17H21N5O9S2	208465-21-8	504.085	182.056	156.077	0.0606061	0.0757576
52	Metosulam	C14H13Cl2N5O4S	139528-85-1	418.014	174.995	140.026	0.0606061	0.0757576
53	Metsulfuron methyl	C14H15N5O6S	74223-64-6	382.082	167.056	199.006	0.0606061	0.0757576
54	Naproanilide	C19H17NO2	52570-16-8	292.133	88.0394	120.081	0.151515	0.189394
55	Naptalam	C18H13NO3	132-66-1	292.097	149.023	144.081	0.30303	0.378788
56	Oryzalin	C12H18N4O6S	19044-88-3	347.102	288.029	198.014	0.30303	0.378788
57	Oxaziclomefone	C20H19Cl2NO2	153197-14-9	376.087	190.086	161.06	0.030303	0.0378788
58	Oxycarboxin	C12H13NO4S	5259-88-1	268.064	175.006	146.975	0.151515	0.189394
59	Oxydemeton-methyl	C6H15O4PS2	301-12-2	247.022	109.005	124.982	0.151515	0.189394
60	Penoxsulam	C16H14F5N5O5S	219714-96-2	484.071	195.076	444.059	0.0606061	0.0757576
61	Propaquizafop	C22H22ClN3O5	111479-05-1	444.132	100.075	163.006	0.0606061	0.0757576
62	Propoxycarbazone sodium	C15H18N4O7S	181274-15-7	399.097	199.006	116.046	0.151515	0.189394
63	Pyrazolynate	C19H16Cl2N2O4S	58011-68-0	439.028	172.956	91.0541	0.0606061	0.0757576
64	Pyrazosulfuron-ethyl	C14H18N6O7S	93697-74-6	415.103	182.056	183.059	0.0606061	0.0757576
65	Pyriftalid	C15H14N2O4S	135186-78-6	319.075	139.05	179.016	0.0606061	0.0757576
66	Quizalofop-ethyl	C19H17ClN2O4	76578-14-8	373.095	299.058	271.063	0.6	0.75
67	Silafluofen	C25H29FO2Si	105024-66-6	426.226	287.126	288.128	0.0606061	0.0757576
68	Simeconazole	C14H20FN3OSi	149508-90-7	294.143	70.0399	135.06	0.0606061	0.0757576
69	Sulfosulfuron	C16H18N6O7S2	141776-32-1	471.075	211.053	218.023	0.0606061	0.0757576
70	Tepraloxydim	C17H24ClNO4	149979-41-9	342.147	166.086	250.143	0.151515	0.189394
71	Tetrachlorvinphos	C10H9Cl4O4P	22248-79-9	364.907	127.016	203.929	0.151515	0.189394
72	Thifensulfuron-methyl	C12H13N5O6S2	79277-27-3	388.038	167.056	204.962	0.0606061	0.0757576
73	Thiodicarb	C10H18N4O4S3	59669-26-0	355.056	88.0216	107.994	0.6	0.75
74	Tralkoxydime	C20H27NO3	87820-88-0	330.206	138.055	96.0444	0.0606061	0.0757576
75	Triasulfuron	C14H16ClN5O5S	82097-50-5	402.063	167.056	141.077	0.0606061	0.0757576
76	Tridemorph	C19H39NO	24602-86-6	298.31	130.123	57.0699	1.5	1.875
77	Trifloxysulfuron sodium	C14H14F3N5O6S	199119-58-9	438.069	257.021	176.032	0.0606061	0.0757576
78	Triforine	C10H14Cl6N4O2	26644-46-2	432.932	389.908	391.905	0.6	0.75
79	Acetaminophen	C8H9NO2	103-90-2	152.071	110.06	65.0382	0.030303	0.0378788
80	Amitriptyline	C20H23N	50-48-6	278.19	191.085	117.07	0.6	0.75
81	Antipyrine	C11H12N2O	60-80-0	189.102	130.065	147.092	0.0606061	0.0757576
82	Atenolol	C14H22N2O3	29122-68-7	267.17	145.065	190.086	0.0606061	0.0757576
83	Bis[4-(dimethylamino)-phenyl] methane	C17H22N2	101-61-1	255.186	239.153	196.112	0.121212	0.151515
84	Chlorpheniramine maleate	C16H19ClN2	113-92-8	275.131	230.072	167.072	0.30303	0.378788
85	Chlorpromazine	C17H19ClN2S	50-53-3	319.103	86.096	58.0647	0.030303	0.0378788
86	Clofibrate	C12H15ClO3	637-07-0	243.078	169.041	59.0487	18	22.5
87	Dextromethorphan	C18H25NO	125-71-3	272.201	215.143	147.08	0.6	0.75
88	Diazepam	C16H13ClN2O	439-14-5	285.079	193.088	154.042	0.121212	0.151515
89	Diphenidol	C21H27NO	3254-89-5	310.217	129.069	292.205	6	7.5
90	Disopyramide	C21H29N3O	3737-09-5	340.238	195.103	239.117	0.0606061	0.0757576
91	Flutamide	C11H11F3N2O3	13311-84-7	277.079	161.045	231.087	30	37.5
92	Furosemide	C12H11ClN2O5S	54-31-9	331.015	81.0334	53.0387	30	37.5
93	Ibuprofen	C13H18O2	15687-27-1	224.165	161.132	119.086	6	7.5
94	Ifenprodil	C21H27NO2	23210-56-2	326.211	308.2	176.143	0.0606061	0.0757576
95	Levofloxacin/Ofloxacin	C18H20FN3O4	82419-36-1/100986-85-4	362.151	261.104	318.161	0.0606061	0.0757576
96	Losartan	C22H23ClN6O	114798-26-4	423.169	207.091	192.08	0.0151515	0.0189394
97	Metoclopramide	C14H22ClN3O2	364-62-5	300.147	227.058	184.016	0.30303	0.378788
98	N,N-Dimethyldodecylamine N-oxide	C14H31NO	1643-20-5	230.248	58.0646	212.237	0.0151515	0.0189394
99	Naproxen	C14H14O3	22204-53-1	231.102	185.096	170.072	0.6	0.75
100	Phenacetin	C10H13NO2	62-44-2	180.102	110.06	138.091	0.30303	0.378788
101	Piperacillin	C23H27N5O7S	61477-96-1	535.197	143.081	160.043	1.5	1.875
102	Primidone	C12H14N2O2	125-33-7	219.113	91.054	162.091	0.030303	0.0378788
103	Roxithromycin	C41H76N2O15	80214-83-1	837.532	679.437	158.117	0.0151515	0.0189394
104	Salinomycin	C42H70O11	53003-10-4	768.526	733.486	715.477	0.030303	0.0378788
105	Sulfamethizole	C9H10N4O2S2	144-82-1	271.032	108.044	156.011	0.30303	0.378788
106	Testosterone	C19H28O2	58-22-0	289.216	109.064	97.0644	0.6	0.75
107	Theophylline	C7H8N4O2	58-55-9	181.072	124.05	69.0444	0.6	0.75
108	Tolperisone	C16H23NO	3644-61-9	246.185	98.0956	70.0648	0.0030303	0.00378788
109	Verapamil	C27H38N2O4	52-53-9	455.29	165.09	303.206	0.0606061	0.0757576
110	2-Quinoxalinecarboxylic acid	C9H6N2O2	879-65-2	175.05	129.044	102.033	0.6	0.75
111	Azithromycin	C38H72N2O12	83905-01-5	749.516	591.421	573.412	0.151515	0.189394
112	Bezafibrate	C19H20ClNO4	41859-67-0	362.115	138.994	121.065	0.151515	0.189394
113	Carazolol	C18H22N2O2	57775-29-8	299.175	116.106	222.091	0.030303	0.0378788
114	Cimetidine	C10H16N6S	51481-61-9	253.123	95.0597	117.048	0.30303	0.378788
115	Clarithromycin	C38H69NO13	81103-11-9	748.484	158.117	590.389	0.151515	0.189394
116	Clenbuterol	C12H18Cl2N2O	37148-27-9	277.087	132.068	203.013	0.151515	0.189394
117	Cotinine	C10H12N2O	486-56-6	177.102	80.0489	98.0596	0.30303	0.378788
118	Dexamethasone	C22H29FO5	50-02-2	393.207	147.08	237.128	0.30303	0.378788
119	Diltiazem	C22H26N2O4S	42399-41-7	415.169	178.031	150.037	0.030303	0.0378788
120	Epinastine	C16H15N3	80012-43-7	250.134	193.088	208.112	0.030303	0.0378788
121	Etodolac	C17H21NO3	41340-25-4	288.159	172.112	143.073	0.0151515	0.0189394
122	Fenofibrate	C20H21ClO4	49562-28-9	361.12	138.994	233.035	0.030303	0.0378788
123	Fluvoxamine	C15H21F3N2O2	54739-18-3	319.163	71.0487	200.068	0.030303	0.0378788
124	Ifosfamide	C7H15Cl2N2O2P	3778-73-2	261.032	153.982	92.0258	0.30303	0.378788
125	Indomethacine	C19H16ClNO4	53-86-1	358.084	138.994	111	0.30303	0.378788
126	Isopropylantipyrine	C14H18N2O	479-92-5	231.149	189.102	56.049	0.30303	0.378788
127	Ketoprofen	C16H14O3	22071-15-4	255.102	105.033	209.096	0.151515	0.189394
128	Lidocaine base	C14H22N2O	137-58-6	235.18	86.0995	58.0648	0.0606061	0.0757576
129	Lincomycin	C18H34N2O6S	154-21-2	407.221	126.127	359.218	0.151515	0.189394
130	Mepirizole	C11H14N4O2	18694-40-1	235.119	220.095	123.055	0.030303	0.0378788
131	Metoprolol	C15H25NO3	37350-58-6	268.191	133.065	116.107	0.0606061	0.0757576
132	o-Ethoxybenzamide	C9H11NO2	938-73-8	166.086	121.028	65.0383	0.30303	0.378788
133	Pentoxifylline	C13H18N4O3	6493-05-6	279.145	181.071	138.066	0.030303	0.0378788
134	Prednisolone	C21H28O5	50-24-8	361.201	147.08	171.08	0.151515	0.189394
135	Promethazine	C17H20N2S	60-87-7	285.142	198.037	86.0956	0.6	0.75
136	Propranolol	C16H21NO2	525-66-6	260.165	183.08	116.106	0.030303	0.0378788
137	Ranitidine	C13H22N4O3S	66357-35-5	315.149	130.056	176.048	0.0606061	0.0757576
138	Reserpine	C33H40N2O9	50-55-5	609.281	195.065	397.212	0.0606061	0.0757576
139	Scopolamine Hydrobromide trihydrate	C17H21NO4	51-34-3	304.154	138.091	156.102	6	7.5
140	Sotalol	C12H20N2O3S	3930-20-9	273.127	133.076	213.069	0.30303	0.378788
141	Sulpiride	C15H23N3O4S	15676-16-1	342.148	112.112	214.017	0.030303	0.0378788
142	Thiamphenicol	C12H15NO5Cl2S	15318-45-3	373.039	307.991	229.006	0.151515	0.189394
143	Tolbutamide	C12H18N2O3S	64-77-7	271.111	91.0535	155.016	0.151515	0.189394
144	4,4'-Bis[2-(2-methoxyphenyl)vinyl]biphenyl	C30H26O2	40470-68-6	419.201	203.086	121.065	1.5	1.875
145	Acetohexamide	C15H20N2O4S	968-81-0	325.122	119.049	183.011	0.30303	0.378788
146	Acetylsalicylic acid	C9H8O4	50-78-2	198.076	121.028	65.0383	6	7.5
147	Ampicillin trihydrate	C16H19N3O4S	69-53-4	350.117	160.043	114.037	15	18.75
148	Aspartame	C14H18N2O5	22839-47-0	295.129	120.081	175.086	0.6	0.75
149	Carbadox	C11H10N4O4	6804-07-5	263.077	90.0355	145.04	0.30303	0.378788
150	Carbazochrome	C10H12N4O3	69-81-8	237.098	164.07	118.065	0.30303	0.378788
151	Cefalexin	C16H17N3O4S	15686-71-2	348.101	140.017	158.027	60	75
152	Cefotaxime	C16H17N5O7S2	63527-52-6	456.064	167.027	126.012	0.151515	0.189394
153	Ceftiofur	C19H17N5O7S3	80373-57-6	524.036	241.039	126.012	0.151515	0.189394
154	Cefuroxime	C16H16N4O8S	55268-75-2	442.103	211.017	318.055	1.5	1.875
155	Clinafloxacin	C17H17ClFN3O3	105956-97-6	366.102	348.091	272.083	3.0303	3.78788
156	Cyclophosphamide monohydrate	C7H15Cl2N2O2P	50-18-0	261.032	140.003	120.021	30	37.5
157	Dehydronifedipine	C17H16N2O6	67035-22-7	345.108	284.091	268.096	0.0606061	0.0757576
158	Digoxin	C41H64O14	20830-75-5	781.437	97.0646	391.248	0.6	0.75
159	Dipyridamole	C24H40N8O4	58-32-2	505.325	460.291	385.246	0.030303	0.0378788
160	Distyrylbiphenyl disulfonate (FB351)	C28H22O6S2	27344-41-8	536.12	349.089	455.077	1.5	1.875
161	Fenoprofen	C15H14O3	31879-05-7	260.128	197.096	119.048	3.0303	3.78788
162	Flufenamic acid	C14H10F3NO2	530-78-9	282.074	264.063	244.057	3.0303	3.78788
163	Fluorescent brightener 71 (FB71)	C40H40N12O8S2	16090-02-1	881.261			30	37.5
164	Griseofulvin	C17H17ClO6	126-07-8	353.079	165.054	215.011	0.030303	0.0378788
165	Haloperidol	C21H23ClFNO2	52-86-8	376.147	165.071	123.024	0.030303	0.0378788
166	Lomefloxacin	C17H19F2N3O3	98079-51-7	352.147	265.115	334.137	1.5	1.875
167	Mefenamic acid	C15H15NO2	61-68-7	242.118	224.107	209.084	0.6	0.75
168	Metformin	C4H11N5	657-24-9	130.109	71.0601	60.0553	0.030303	0.0378788
169	N,N-Dicyclohexylurea	C13H24N2O	2387-23-7	225.196	61.0393	143.118	0.0151515	0.0189394
170	Oxacillin	C19H19N3O5S	66-79-5	402.112	144.045	228.075	6	7.5
171	Paroxetine	C19H20FNO3	61869-08-7	330.15	192.118	70.0647	0.030303	0.0378788
172	Phenytoin	C15H12N2O2	57-41-0	253.097	182.096	104.049	1.5	1.875
173	Pirenzepine	C19H21N5O2	28797-61-7	352.177	113.107	252.077	0.0606061	0.0757576
174	Stevioside	C38H60O18	57817-89-7	822.412	319.227	325.113	0.6	0.75
175	Sulfasalazine	C18H14N4O5S	599-79-1	399.076	381.065	223.05	0.0151515	0.0189394
176	Taurodeoxycholic acid	C26H45NO6S	1180-95-6	500.304	464.283	339.269	1.5	1.875
177	Terbutaline	C12H19NO3	23031-25-6	226.144	152.071	125.06	0.30303	0.378788
178	Theobromine	C7H8N4O2	83-67-0	181.072	138.066	163.061	0.6	0.75
179	1H-Benzotriazole	C6H5N3	95-14-7	120.056	65.0385	120.055	0.0606061	0.0757576
180	2-(Dibutylamino)ethanol	C10H23NO	102-81-8	174.185	118.122	57.0697	0.0606061	0.0757576
181	2,3,5-Trimethacarb	C11H15NO2	2655-15-4	194.118	137.096	122.072	3.0303	3.78788
182	4-&5-Methyl-1H-benzotriazole	C7H7N3	29878-31-7, 136-85-6	134.071	77.0384	79.0542	0.151515	0.189394
183	4,4'-Diaminodiphenyl ether	C12H12N2O	101-80-4	201.102	108.044	80.0493	0.0606061	0.0757576
184	4,4'-Diaminodiphenyl-methane	C13H14N2	101-77-9	199.123	106.065	89.0382	0.0606061	0.0757576
185	4-Chloro-4'-hydroxybenzophenone	C13H9ClO2	42019-78-3	233.036	138.994	121.028	1.5	1.875
186	4-Epichlortetracycline	C22H23ClN2O8	101342-45-4	479.122	462.095	197	0.30303	0.378788
187	4-Hydroxybenzoic acid-methyl ester (Methylparaben)	C8H8O3	99-76-3	153.055	121.028	65.0386	6	7.5
188	4-Hydroxybenzoic acid-propyl ester (Propylparaben)	C10H12O3	94-13-3	181.086	121.028	77.0385	3.0303	3.78788
189	4-Methylbenzylidene camphor (4-MBC)	C18H22O	36861-47-9	255.174	105.07	212.12	0.151515	0.189394
190	5,6-Dimethyl-1H-benzotriazole	C8H9N3	1354973-50-4	148.087	77.0384	91.0541	0.6	0.75
191	Acetazolamide	C4H6N4O3S2	59-66-5	222.995	180.985	163.958	0.6	0.75
192	Amitrole	C2H4N4	61-82-5	85.0509	57.0444	58.0398	0.6	0.75
193	Atrazine-desethyl	C6H10ClN5	6190-65-4	188.07	146.023	104.001	0.0606061	0.0757576
194	BP-3 (Benzophenone-3, 2-Hydroxy-4-methoxy benzophenone)	C14H12O3	131-57-7	229.086	151.039	105.034	0.0606061	0.0757576
195	Diflufenican	C19H11F5N2O2	83164-33-4	395.081	266.041	246.036	0.151515	0.189394
196	Dimefuron	C15H19ClN4O3	34205-21-5	339.122	72.0441	167.001	0.151515	0.189394
197	Ethyl p-hydroxybenzoate	C9H10O3	120-47-8	167.07	77.0383	121.028	0.6	0.75
198	Ethylhexyl methoxycinnamate (EHMC, OMC)	C18H26O3	5466-77-3	291.195	161.059	133.065	0.0606061	0.0757576
199	Guanylurea	C2H6N4O	141-83-3	103.061	60.0553	69.0085	1.5	1.875
200	Isochlortetracycline	C22H23ClN2O8	514-53-4	479.122	462.095	197.001	0.030303	0.0378788
201	Metolachlor	C15H22ClNO2	51218-45-2	284.141	176.143	252.114	0.030303	0.0378788
202	Neohesperidine dihydrochalcone	C28H36O15	20702-77-6	630.239	137.06	305.102	0.6	0.75
203	Neotame	C20H30N2O5	165450-17-9	379.223	172.133	259.181	0.0606061	0.0757576
204	Octocrylene	C24H27NO2	6197-30-4	379.238	232.075	204.081	0.0606061	0.0757576
205	o-Dianisidine	C14H16N2O2	119-90-4	245.128	187.087	230.105	0.30303	0.378788
206	Oleandomycin	C35H61NO12	3922-90-5	688.427	158.117	544.347	0.6	0.75
207	Prednisone	C21H26O5	53-03-2	359.185	147.081	171.081	0.0606061	0.0757576
208	Propazine	C9H16ClN5	139-40-2	230.117	146.023	188.07	0.151515	0.189394
209	p-Toluenesulfonamide	C7H9NO2S	70-55-3	172.043	91.0544	65.0383	6	7.5
210	Sucralose	C12H19Cl3O8	56038-13-2	414.048	198.992	85.0281	0.6	0.75
211	Terbuthylazine	C9H16ClN5	5915-41-3	230.117	174.053	132.032	0.151515	0.189394
212	Terbuthylazine-desethyl	C7H12ClN5	30125-63-4	202.085	146.023	104.001	0.151515	0.189394
213	2,2-bis(chloromethyl)-propane-1,3-diyltetrakis(2-chloroethyl)bisphosphate (BCMP-BCEP, V6)	C13H24Cl6O8P2	38051-10-4	597.942	360.95	296.961	1.2	1.5
214	Bisphenol-A bis(diphenyl phosphate) (BDP, CR-741)	C39H34O8P2	5945-33-5	710.207	694.181	367.108	0.2	0.25
215	Diethylene glycol bis[di(2-chloroisopropyl) phosphate] (DEG-BDCIPP, CR-504L)	C16H32Cl4O9P2	184530-92-5	588.061	164.075	136.081	2	2.5
216	Enalapril Maleate	C20H28N2O5	76095-16-4	377.207	234.149	160.112	1.5	1.875
217	Fexofenadine	C32H39NO4	83799-24-0	502.295	466.273	484.283	2	2.5
218	Fluoxetine Hydrochloride	C17H18F3NO	56296-78-7	310.141	148.112	117.07	0.0606061	0.0757576
219	Gemfibrozil	C15H22O3	25812-30-0	251.164	83.0857	129.091	20	25
220	Melamine	C3H6N6	108-78-1	127.073	85.0513	68.0247	5	6.25
221	Metamizol sodium	C13H17N3O4S	68-89-3	312.101	230.129	97.0761	0.0606061	0.0757576
222	Phosphoric acid 1,3-phenylene tetrakis(2,6-dimethylphenyl)ester (RDX)	C38H40O8P2	139189-30-3	704.254	689.232	733.291	0.08	0.1
223	Phosphoric acid diphenyl methylphenyl ester (MPDPP)	C19H17O4P	26444-49-5	341.094	152.062	229.042	6	7.5
224	Tetraglyme	C10H22O5	143-24-8	240.181	59.0493	103.076	8	10
225	Tetraphenyl resorcinol bis(diphenylphosphate) (RDP, CR-733S)	C30H24O8P2	57583-54-7	592.128	577.108	576.104	0.08	0.1
226	Triphenyl phosphate (TPHP)	C18H15O4P	115-86-6	327.078	215.026	152.062	20	25
227	Tris(2,6-dimethylphenyl)phosphate (2,6-TDMPP)	C24H27O4P	121-06-2	411.172	105.07	305.094	0.4	0.5
228	Tris(2-chloro- isopropyl)phosphate (TCIPP)	C9H18Cl3O4P	13674-84-5	327.008	98.9839	174.993	0.30303	0.378788
229	Tris(2-chloroethyl)phosphate (TCEP)	C6H12Cl3O4P	115-96-8	284.961	62.9997	222.969	10	12.5
230	Tris(2-isopropylphenyl)phosphate (2-TIPPP)	C27H33O4P	64532-95-2	453.219	327.078	369.125	0.4	0.5
231	Tris(3,5-xylyl)phosphate (3,5-TDMPP)	C24H27O4P	25653-16-1	411.172	194.109	271.089	0.2	0.25
232	Tris(3-isopropylphenyl)phosphate (3-TIPPP)	C27H33O4P	72668-27-0	453.219	411.171	369.124	0.4	0.5
233	Tris(4-isopropylphenyl)phosphate (4-TIPPP)	C27H33O4P	26967-76-0	453.219	411.172	369.125	0.4	0.5
234	Trisbutyl phosphate (TNBP)	C12H27O4P	126-73-8	267.172	98.9837	155.047	4	5
235	Trisisobutyl phosphate (TIBP)	C12H27O4P	126-71-6	267.172	98.9839	57.0701	4	5
236	Trisoctyl phosphate (TNOP)	C24H51O4P	1806-54-8	435.36	98.9838	211.109	0.30303	0.378788
237	Benzalkonium	C23H41N	8001-54-5	332.331	91.054	240.269	4	5
238	Benzethonium	C27H41NO2	121-54-0	412.321	320.259	72.081	0.2	0.25
239	Cefazolin	C14H14N8O4S3	27164-46-1	455.037	156.012	252.044	4	5
240	Chloramphenicol	C11H12Cl2N2O5	56-75-7	323.02	165.066	274.999	0.0606061	0.0757576
241	Diaveridine	C13H16N4O2	5355-16-8	261.135	245.103	123.067	0.4	0.5
242	Difloxacin	C21H19F2N3O3	98106-17-3	400.147	382.136	299.1	8	10
243	Doxycycline	C22H24N2O8	24390-14-5	445.161	428.134	410.124	8	10
244	Enrofloxacin	C19H22FN3O3	93106-60-6	360.172	342.162	316.182	20	25
245	Erythromycin	C37H67NO13	114-07-8	734.469	158.118	576.375	1	1.25
246	Flumequine	C14H12FNO3	42835-25-6	262.087	244.077	202.03	2	2.5
247	Leucomycins	C39H65NO14	18361-45-0	772.448	174.113	558.327	2	2.5
248	Meropenem	C17H25N3O5S	119478-56-7	384.159	141.102	68.049	20	25
249	Nalidixic acid	C12H12N2O3	389-08-2	233.092	187.051	215.081	2	2.5
250	Norfloxacin	C16H18FN3O3	70458-96-7	320.14	302.13	282.124	80	100
251	Orbifloxacin	C19H20F3N3O3	113617-63-3	396.153	378.143	295.107	0.30303	0.378788
252	Ormetoprim	C14H18N4O2	6981-18-6	275.15	259.119	123.067	0.2	0.25
253	Oxolinic acid	C13H11NO5	14698-29-4	262.071	244.061	216.029	2	2.5
254	Oxytetracycline	C22H24N2O9	2058-46-0	461.155	426.119	201.055	8	10
255	Piromidic acid	C14H16N4O3	19562-30-2	289.13	271.119	243.088	0.8	1
256	Pyrimethamine	C12H13ClN4	58-14-0	249.09	233.059	177.022	0.2	0.25
257	Sulfabenzamide	C13H12N2O3S	127-71-9	277.064	156.012	108.045	0.4	0.5
258	Sulfabromomethazine	C12H13BrN4O2S	116-45-0	357.002	201.998	263.944	6	7.5
259	Sulfacetamide	C8H10N2O3S	144-80-9	215.048	92.049	108.044	40	50
260	Sulfachloropyridazine	C10H9ClN4O2S	80-32-0	285.021	156.012	108.044	2	2.5
261	Sulfadiazine	C10H10N4O2S	68-35-9	251.06	156.012	108.045	0.4	0.5
262	Sulfadimethoxine	C12H14N4O4S	122-11-2	311.081	156.012	108.045	0.2	0.25
263	Sulfadimidine	C12H14N4O2S	57-68-1	279.091	186.033	124.087	6	7.5
264	Sulfadoxine	C12H14N4O4S	2447-57-6	311.081	156.012	108.045	6	7.5
265	Sulfaethoxypyridazine	C12H14N4O3S	963-14-4	295.086	156.012	108.045	0.2	0.25
266	Sulfamerazine	C11H12N4O2S	127-79-7	265.075	108.045	156.012	6	7.5
267	Sulfamethoxazole	C10H11N3O3S	723-46-6	254.059	108.045	156.012	0.2	0.25
268	Sulfamethoxypyridazine	C11H12N4O3S	80-35-3	281.07	108.045	126.066	2	2.5
269	Sulfametoxydiazine	C11H12N4O3S	651-06-9	281.07	108.045	126.066	0.8	1
270	Sulfamonomethoxine	C11H12N4O3S	1220-83-3	281.07	108.045	126.066	2	2.5
271	Sulfanilamide	C6H8N2O2S	63-74-1	173.038	65.039	92.05	8	10
272	Sulfanitran	C14H13N3O5S	122-16-7	336.065	156.012	93.058	0.08	0.1
273	Sulfapyridine	C11H11N3O2S	144-83-2	250.064	156.012	108.045	0.08	0.1
274	Sulfaquinoxaline	C14H12N4O2S	59-40-5	301.075	156.012	108.045	2	2.5
275	Sulfathiazole	C9H9N3O2S2	72-14-0	256.021	156.012	108.045	0.08	0.1
276	Sulfatroxazole	C11H13N3O3S	23256-23-7	268.075	156.012	113.071	0.4	0.5
277	Sulfisomidine	C12H14N4O2S	515-64-0	279.091	124.087	186.034	0.8	1
278	Sulfisoxazole	C11H13N3O3S	127-69-5	268.075	156.012	108.045	0.2	0.25
279	Sulfisozole	C9H9N3O3S	73247-57-1.	240.044	156.012	108.045	0.8	1
280	Tetracycline	C22H24N2O8	64-75-5	445.161	410.124	154.05	8	10
281	Tiamulin	C28H47NO4S	55297-95-5	494.33	192.105	119.016	0.4	0.5
282	Tilmicosin	C46H80N2O13	108050-54-0	869.573	696.471	174.112	0.030303	0.0378788
283	Trimethoprim	C14H18N4O3	738-70-5	291.145	230.116	123.067	0.08	0.1
284	Tylosin	C46H77NO17	1401-69-0	916.526	772.453	174.113	2	2.5
285	3-Hydroxycarbofuran	C12H15NO4	16655-82-6	238.107	135.081	163.076	2	2.5
286	Acephate	C4H10NO3PS	30560-19-1	184.019	94.9891	142.993	2	2.5
287	Acetamiprid	C10H11ClN4	135410-20-7	223.075	126.01	56.0494	2	2.5
288	Acibenzolar-S-methyl	C8H6N2OS2	135158-54-2	210.999	136.009	139.975	2	2.5
289	Alanycarb	C17H25N3O4S2	83130-01-2	400.136	138.037	150.037	0.4	0.5
290	Aldicarb	C7H14N2O2S	116-06-3	208.111	89.0418	61.0105	20	25
291	Aldicarb sulfone	C7H14N2O4S	1646-88-4	240.101	86.0599	81.0004	2	2.5
292	Aldicarb sulfoxide	C7H14N2O3S	1646-87-3	207.08	89.0421	69.0572	2	2.5
293	Ametryn	C9H17N5S	834-12-8	228.128	186.081	96.0555	0.2	0.25
294	Aminocarb	C11H16N2O2	2032-59-9	209.128	137.084	122.06	0.4	0.5
295	Avermectin B1a	C48H72O14	71751-41-2	890.526	305.211	145.086	4	5
296	Avermectin B1b	C47H70O14	71751-41-2	876.51	142.123	718.453	4	5
297	Azoxystrobin	C22H17N3O5	131860-33-8	404.124	344.103	329.08	0.2	0.25
298	Benalaxyl	C20H23NO3	71626-11-4	326.175	148.112	91.0542	0.2	0.25
299	Bendiocarb	C11H13NO4	22781-23-3	224.092	109.028	81.0335	0.8	1
300	Benfuracarb	C20H30N2O5S	82560-54-1	411.195	195.047	190.089	0.08	0.1
301	Benzoximate	C18H18ClNO5	29104-30-1	364.095	199.016	105.034	0.8	1
302	Bifenazate	C17H20N2O3	149877-41-8	301.155	170.097	153.07	0.8	1
303	Bitertanol	C20H23N3O2	55179-31-2	338.186	70.04	99.0805	0.2	0.25
304	Boscalid	C18H12Cl2N2O	188425-85-6	343.04	307.064	272.094	0.4	0.5
305	Bromuconazole Isomer 1	C13H12BrCl2N3O	116255-48-2	375.961	158.98	70.0398	0.4	0.5
306	Bromuconazole Isomer 2	C13H12BrCl2N3O	116255-48-2	375.961	158.976	70.04	0.4	0.5
307	Bupirimate	C13H24N4O3S	41483-43-6	317.164	166.098	210.16	0.2	0.25
308	Buprofezin	C16H23N3OS	69327-76-0	306.163	57.07	106.065	0.08	0.1
309	Butafenacil	C20H18ClF3N2O6	134605-64-4	492.114	331.01	179.985	0.2	0.25
310	Butocarboxim	C7H14N2O2S	34681-10-2	208.111	75.0263	77.0218	40	50
311	Carbaryl	C12H11NO2	63-25-2	202.086	127.054	145.065	2	2.5
312	Carbendazim	C9H9N3O2	10605-21-7	192.077	160.05	132.056	0.2	0.25
313	Carbetamide	C12H16N2O3	16118-49-3	237.123	120.045	72.0809	0.8	1
314	Carbofuran	C12H15NO3	1563-66-2	222.112	123.044	165.091	0.4	0.5
315	Carboxin	C12H13NO2S	5234-68-4	236.074	143.016	86.9898	0.4	0.5
316	Carfentrazone-ethyl	C15H14Cl2F3N3O3	128639-02-1	429.07	345.996	366.002	0.2	0.25
317	Chlorantraniliprole	C18H14BrCl2N5O2	500008-45-7	481.978	283.923	450.937	2	2.5
318	Chlorfluazuron	C20H9Cl3F5N3O3	71422-67-8	539.97	382.936	158.041	0.8	1
319	Chlorotoluron	C10H13ClN2O	15545-48-9	213.079	72.0444	140.026	0.2	0.25
320	Chloroxuron	C15H15ClN2O2	1982-47-4	291.089	72.0444	125.015	0.2	0.25
321	Clethodim Isomer 1	C17H26ClNO3S	99129-21-2	360.139	164.071	166.086	0.08	0.1
322	Clethodim Isomer 2	C17H26ClNO3S	99129-21-2	360.139	164.071	166.086	0.4	0.5
323	Clofentezine	C14H8Cl2N4	74115-24-5	303.02	138.01	102.034	0.8	1
324	Clothianidin	C6H8ClN5O2S	210880-92-5	250.016	131.967	169.054	0.8	1
325	Cyazofamid	C13H13ClN4O2S	120116-88-3	325.052	108.011	217.04	0.4	0.5
326	Cycluron	C11H22N2O	2163-69-1	199.18	72.0444	69.0699	0.8	1
327	Cymoxanil	C7H10N4O3	57966-95-7	199.083	111.019	83.0237	4	5
328	Cyproconazole Isomer 1	C15H18ClN3O	94361-06-5	292.121	70.0401	125.015	0.08	0.1
329	Cyproconazole Isomer 2	C15H18ClN3O	94361-06-5	292.121	70.04	125.015	0.08	0.1
330	Cyprodinil	C14H15N3	121552-61-2	226.134	210.103	108.081	0.2	0.25
331	Cyromazine	C6H10N6	66215-27-8	167.104	68.0241	85.0508	0.4	0.5
332	Desmedipham	C16H16N2O4	13684-56-5	318.145	136.039	154.05	0.4	0.5
333	Diclobutrazol	C15H19Cl2N3O	75736-33-3	328.098	70.0403	158.977	0.4	0.5
334	Dicrotophos	C8H16NO5P	141-66-2	238.084	72.0445	127.016	0.4	0.5
335	Diethofencarb	C14H21NO4	87130-20-9	268.154	124.039	152.071	0.4	0.5
336	Difenoconazole Isomer 1&2	C19H17Cl2N3O3	119446-68-3	406.072	251.003	337.04	0.4	0.5
337	Diflubenzuron	C14H9ClF2N2O2	35367-38-5	311.039	141.015	158.041	0.4	0.5
338	Dimethoate	C5H12NO3PS2	60-51-5	230.007	124.982	78.9942	0.8	1
339	Dimethomorph Isomer 1	C21H22ClNO4	110488-70-5	388.131	301.063	165.055	4	5
340	Dimethomorph Isomer 2	C21H22ClNO4	110488-70-5	388.131	301.063	165.055	4	5
341	Dimoxystrobin	C19H22N2O3	149961-52-4	327.17	116.05	58.0288	0.2	0.25
342	Diniconazole	C15H17Cl2N3O	83657-24-3	326.082	70.0399	158.976	0.4	0.5
343	Dinotefuran	C7H14N4O3	165252-70-0	203.114	73.0633	114.103	2	2.5
344	Dioxacarb	C11H13NO4	6988-21-2	224.092	123.044	95.0493	0.8	1
345	Diuron	C9H10Cl2N2O	330-54-1	233.024	72.0443	159.971	0.8	1
346	Doramectin	C50H74O14	117704-25-3	899.515	145.086	219.173	20	25
347	Emamectin-benzoate b1a	C49H75NO13	155569-91-8	886.531	158.118	302.197	0.4	0.5
348	Emamectin-benzoate b1b	C48H73NO13	155569-91-8	872.515	158.117	82.0654	0.8	1
349	Epoxiconazole	C17H13ClFN3O	133855-98-8	330.08	121.045	123.024	0.2	0.25
350	Eprinomectin	C50H75NO14	123997-26-2	914.526	186.112	154.086	4	5
351	Etaconazole Isomer 1&2	C14H15Cl2N3O2	60207-93-4	328.061	158.976	55.0544	0.4	0.5
352	Ethiofencarb	C11H15NO2S	29973-13-5	226.09	107.049	77.0386	2	2.5
353	Ethiprole	C13H9Cl2F3N4OS	181587-01-9	396.99	350.949	254.97	0.4	0.5
354	Ethirimol	C11H19N3O	23947-60-6	210.16	140.107	98.0602	2	2.5
355	Ethofumesate	C13H18O5S	26225-79-6	304.121	121.065	161.06	0.2	0.25
356	Etoxazole	C21H23F2NO2	153233-91-1	360.177	141.015	177.128	0.2	0.25
357	Famoxadone	C22H18N2O4	131807-57-3	392.16	195.081	238.11	0.8	1
358	Fenamidone	C17H17N3OS	161326-34-7	312.117	92.0497	236.119	0.08	0.1
359	Fenarimol	C17H12Cl2N2O	60168-88-9	331.04	268.053	138.994	0.4	0.5
360	Fenazaquin	C20H22N2O	120928-09-8	307.18	57.0699	161.132	0.2	0.25
361	Fenbuconazole	C19H17ClN4	114369-43-6	337.121	125.015	129.07	0.4	0.5
362	Fenhexamid	C14H17Cl2NO2	126833-17-8	302.071	97.1014	55.0543	0.4	0.5
363	Fenobucarb	C12H17NO2	3766-81-2	208.133	95.0492	77.0385	2	2.5
364	Fenoxycarb	C17H19NO4	79127-80-3	302.139	88.0393	116.071	0.2	0.25
365	Fenpropimorph	C20H33NO	67564-91-4	304.263	147.117	130.123	2	2.5
366	Fenpyroximate	C24H27N3O4	111812-58-9	422.207	366.144	135.044	0.2	0.25
367	Fenuron	C9H12N2O	101-42-8	165.102	72.0444	77.0386	0.4	0.5
368	Fipronil	C12H4Cl2F6N4OS	120068-37-3	453.973	367.951	289.976	0.4	0.5
369	Flonicamid	C9H6F3N3O	158062-67-0	230.054	148.037	203.043	0.8	1
370	Flubendiamide	C23H22F7IN2O4S	272451-65-7	683.031	273.937	407.976	2	2.5
371	Fludioxonil	C12H6F2N2O2	131341-86-1	266.074	158.04	229.041	0.8	1
372	Flufenacet	C14H13F4N3O2S	142459-58-3	364.074	152.05	124.056	0.2	0.25
373	Flufenoxuron	C21H11ClF6N2O3	101463-69-8	489.044	158.042	141.015	0.4	0.5
374	Fluometuron	C10H11F3N2O	2164-17-2	233.09	72.0445	160.037	0.8	1
375	Fluoxastrobin	C21H16ClFN4O5	361377-29-9	459.087	427.06	188.038	0.2	0.25
376	Fluquinconazole	C16H8Cl2FN5O	136426-54-5	376.016	306.984	349.006	0.8	1
377	Flusilazole	C16H15F2N3Si	85509-19-9	316.108	165.07	247.075	0.8	1
378	Flutolanil	C17H16F3NO2	66332-96-5	324.121	242.061	262.067	0.8	1
379	Flutriafol	C16H13F2N3O	76674-21-0	302.11	70.0401	123.024	0.2	0.25
380	Forchlorfenuron	C12H10ClN3O	68157-60-8	248.059	129.021	93.0445	0.4	0.5
381	Formetanate HCl	C11H15N3O2	23422-53-9	222.124	165.102	120.044	0.0606061	0.0757576
382	Fuberidazole	C11H8N2O	3878-19-1	185.071	157.076	156.069	0.2	0.25
383	Furalaxyl	C17H19NO4	57646-30-7	302.139	95.0126	242.118	0.08	0.1
384	Furathiocarb	C18H26N2O5S	65907-30-4	383.164	195.048	167.053	0.2	0.25
385	Halofenozide	C18H19ClN2O2	112226-61-6	331.121	105.033	138.994	2	2.5
386	Hexaconazole	C14H17Cl2N3O	79983-71-4	314.082	70.0401	158.976	0.4	0.5
387	Hexaflumuron	C16H8Cl2F6N2O3	86479-06-3	460.989	158.041	141.015	2	2.5
388	Hexythiazox	C17H21ClN2O2S	78587-05-0	353.109	168.057	228.024	0.2	0.25
389	Hydramethylnon	C25H24F6N4	67485-29-4	495.198	323.148	368.087	0.4	0.5
390	Imazalil	C14H14Cl2N2O	35554-44-0	297.056	172.992	200.987	0.8	1
391	Imidacloprid	C9H10ClN5O2	138261-41-3	256.06	209.06	175.098	0.4	0.5
392	Indoxacarb	C22H17ClF3N3O7	144171-61-9	528.078	150.011	218.043	0.2	0.25
393	Ipconazole Isomer 1	C18H24ClN3O	125225-28-7	334.168	70.0402	334.168	0.2	0.25
394	Ipconazole Isomer 2	C18H24ClN3O	125225-28-7	334.168	70.0401	125.016	0.2	0.25
395	Iprovalicarb Isomer 1&2	C18H28N2O3	140923-17-7	321.217	119.086	116.071	2	2.5
396	Isocarbophos	C11H16NO4PS	24353-61-5	307.088	230.988	121.028	40	50
397	Isoprocarb	C11H15NO2	2631-40-5	194.118	95.0492	77.0385	8	10
398	Isoproturon	C12H18N2O	34123-59-6	207.149	72.0466	134.097	0.2	0.25
399	Ivermectin B1a	C48H74O14	70288-86-7	892.542	307.226	551.336	8	10
400	Kresoxim-methyl	C18H19NO4	143390-89-0	314.139	131.073	116.049	0.4	0.5
401	Linuron	C9H10Cl2N2O2	330-55-2	249.019	159.972	132.961	0.4	0.5
402	Lufenuron	C17H8Cl2F8N2O3	103055-07-8	510.986	158.041	141.015	2	2.5
403	Mandipropamid	C23H22ClNO4	374726-62-2	412.131	125.016	328.111	0.2	0.25
404	Mefenacet	C16H14N2O2S	73250-68-7	299.085	120.081	148.076	0.4	0.5
405	Mepanipyrim	C14H13N3	110235-47-7	224.118	106.065	209.095	0.8	1
406	Mepronil	C17H19NO2	55814-41-0	270.149	119.049	91.0542	0.2	0.25
407	Mesotrione	C14H13NO7S	104206-82-8	340.049	227.996	104.013	2	2.5
408	Metaflumizone	C24H16F6N4O2	139968-49-3	507.125	178.048	287.079	0.4	0.5
409	Metalaxyl	C15H21NO4	57837-19-1	280.154	160.112	192.138	0.4	0.5
410	Metconazole	C17H22ClN3O	125116-23-6	320.152	70.04	125.015	0.08	0.1
411	Methabenzthiazuron	C10H11N3OS	18691-97-9	222.07	165.048	150.025	0.4	0.5
412	Methamidophos	C2H8NO2PS	10265-92-6	142.009	94.0051	124.982	2	2.5
413	Methiocarb	C11H15NO2S	2032-65-7	226.09	121.065	122.073	0.8	1
414	Methomyl	C5H10N2O2S	16752-77-5	163.054	72.9982	88.0214	8	10
415	Methoprotryne	C11H21N5OS	841-06-5	272.154	170.05	198.081	0.2	0.25
416	Methoxyfenozide	C22H28N2O3	161050-58-4	369.217	149.06	133.065	0.4	0.5
417	Metobromuron	C9H11BrN2O2	3060-89-7	259.008	169.96	170.968	0.8	1
418	Metribuzin	C8H14N4OS	21087-64-9	215.096	187.101	84.0807	0.8	1
419	Mevinphos Isomer 1	C7H13O6P	7786-34-7	225.052	127.015	109.005	4	5
420	Mevinphos Isomer 2	C7H13O6P	7786-34-7	225.052	127.015	109.005	20	25
421	Mexacarbate	C12H18N2O2	315-18-4	223.144	151.099	136.076	0.4	0.5
422	Monocrotophos	C7H14NO5P	6923-22-4	224.068	127.016	58.0288	4	5
423	Monolinuron	C9H11ClN2O2	1746-81-2	215.058	126.011	127.018	0.8	1
424	Moxidectin	C37H53NO8	113507-06-5	640.384	199.112	498.285	0.8	1
425	Myclobutanil	C15H17ClN4	88671-89-0	289.121	70.0399	125.015	0.4	0.5
426	Neburon	C12H16Cl2N2O	555-37-3	275.071	57.07	88.1121	0.2	0.25
427	Nitenpyram	C11H15ClN4O2	120738-89-8	271.096	126.011	237.09	0.4	0.5
428	Novaluron	C17H9ClF8N2O4	116714-46-6	493.02	158.041	141.015	0.8	1
429	Nuarimol	C17H12ClFN2O	63284-71-9	315.069	252.082	243.037	0.4	0.5
430	Omethoate	C5H12NO4PS	1113-02-6	214.03	124.982	109.005	0.8	1
431	Oxadixyl	C14H18N2O4	77732-09-3	279.134	132.081	133.089	2	2.5
432	Oxamyl	C7H13N3O3S	23135-22-0	237.102	72.0444	90.0549	2	2.5
433	Penconazole	C13H15Cl2N3	66246-88-6	284.072	158.976	70.0401	0.2	0.25
434	Pencycuron	C19H21ClN2O	66063-05-6	329.142	125.015	127.013	0.2	0.25
435	Phenmedipham	C16H16N2O4	13684-63-4	318.145	136.039	168.066	0.4	0.5
436	Picoxystrobin	C18H16F3NO4	117428-22-5	368.11	145.065	115.055	0.4	0.5
437	Piperonyl butoxide	C19H30O5	51-03-6	356.243	177.091	149.06	0.4	0.5
438	Pirimicarb	C11H18N4O2	23103-98-2	239.15	72.0444	182.129	0.4	0.5
439	Prochloraz	C15H16Cl3N3O2	67747-09-5	376.038	70.0287	308.001	0.2	0.25
440	Promecarb	C12H17NO2	2631-37-0	208.133	109.065	91.0543	0.8	1
441	Prometon	C10H19N5O	1610-18-0	226.166	184.12	142.072	0.4	0.5
442	Prometryne	C10H19N5S	7287-19-6	242.143	158.049	200.096	0.2	0.25
443	Propamocarb	C9H20N2O2	24579-73-5	189.16	102.055	74.0237	0.4	0.5
444	Propargite	C19H26O4 S	2312-35-8	368.189	57.07	175.112	0.2	0.25
445	Propham	C10H13NO2	122-42-9	180.102	92.0494	120.044	40	50
446	Propiconazole Isomer 1&2	C15H17Cl2N3O2	60207-90-1	342.077	158.977	69.0699	0.08	0.1
447	Propoxur	C11H15NO3	114-26-1	210.112	93.0334	111.044	0.4	0.5
448	Prothioconazole	C14H15Cl2N3OS	178928-70-6	344.039	154.078	189.047	2	2.5
449	Pymetrozine	C10H11N5O	123312-89-0	218.104	105.045	78.0337	0.2	0.25
450	Pyracarbolid	C13H15NO2	24691-76-7	218.118	125.06	97.0284	0.2	0.25
451	Pyraclostrobin	C19H18ClN3O4	175013-18-0	388.106	163.063	149.047	0.2	0.25
452	Pyridaben	C19H25ClN2OS	96489-71-3	365.145	147.117	309.082	0.4	0.5
453	Pyrimethanil	C12H13N3	53112-28-0	200.118	183.092	168.068	0.8	1
454	Pyriproxyfen	C20H19NO3	95737-68-1	322.144	96.0443	185.06	0.2	0.25
455	Quinoxyfen	C15H8Cl2FNO	124495-18-7	308.004	196.98	272.028	0.4	0.5
456	Rotenone	C23H22O6	83-79-4	395.149	213.091	192.078	0.2	0.25
457	Secbumeton	C10H19N5O	26259-45-0	226.166	170.104	114.066	0.4	0.5
458	Siduron Isomer 1	C14H20N2O	1982-49-6	233.165	94.065	137.071	0.8	1
459	Simetryn	C8H15N5S	1014-70-6	214.112	124.087	68.0243	0.4	0.5
460	Spinetoram	C42H69NO10	187166-40-1	748.499	142.123	203.127	0.2	0.25
461	Spinosad (Spinosyn A)	C41H65NO10	168316-95-8 (131929-60-7)	732.468	142.123		0.4	0.5
462	Spinosad (Spinosyn D)	C42H67NO10	168316-95-8 (131929-63-0)	746.484			0.2	0.25
463	Spirodiclofen	C21H24Cl2O4	148477-71-8	411.112	71.0856	313.04	0.2	0.25
464	Spiromesifen	C23H30O4	283594-90-1	388.248	273.148	255.138	2	2.5
465	Spirotetramat	C21H27NO5	203313-25-1	374.196	216.102	270.149	0.08	0.1
466	Spiroxamine Isomer 1	C18H35NO2	118134-30-8	298.274	144.138	100.112	0.04	0.05
467	Spiroxamine Isomer 2	C18H35NO2	118134-30-8	298.274	144.138	100.112	0.08	0.1
468	Sulfentrazone	C11H10Cl2F2N4O3S	122836-35-5	404.016	386.99	306.997	0.8	1
469	Tebuconazole	C16H22ClN3O	107534-96-3	308.152	70.0402	125.015	0.08	0.1
470	Tebufenozide	C22H28N2O2	112410-23-8	353.222	133.065	105.07	0.8	1
471	Tebufenpyrad	C18H24ClN3O	119168-77-3	334.168	145.053	147.117	0.2	0.25
472	Tebuthiuron	C9H16N4OS	34014-18-1	229.112	172.091	116.006	0.2	0.25
473	Teflubenzuron	C14H6Cl2F4N2O2	83121-18-0	380.982	158.041	141.015	8	10
474	Temephos	C16H20O6P2S3	3383-96-8	484.024	418.994	124.982	0.2	0.25
475	Terbumeton	C10H19N5O	33693-04-8	226.166	170.104	142.066	0.2	0.25
476	Terbutryn	C10H19N5S	886-50-0	242.143	186.081	71.0604	0.2	0.25
477	Tetraconazole	C13H11Cl2F4N3O	112281-77-3	372.029	158.977	70.0401	0.2	0.25
478	Thiabendazole	C10H7N3S	148-79-8	202.043	175.033	131.061	0.08	0.1
479	Thiacloprid	C10H9ClN4S	111988-49-9	253.031	126.011	90.0336	0.4	0.5
480	Thiamethoxam	C8H10ClN5O3S	153719-23-4	292.027	131.967	181.054	0.4	0.5
481	Thidiazuron	C9H8N4OS	51707-55-2	221.049	102.012	127.991	0.4	0.5
482	Thiobencarb	C12H16ClNOS	28249-77-6	258.071	125.015	89.0384	2	2.5
483	Thiofanox	C9H18N2O2S	39196-18-4	219.116	57.0698	61.0102	40	50
484	Thiophanate-methyl	C12H14N4O4S2	23564-05-8	343.053	151.032	160.051	0.2	0.25
485	Triadimefon	C14H16ClN3O2	43121-43-3	294.1	69.0698	197.073	0.2	0.25
486	Triadimenol	C14H18ClN3O2	55219-65-3	296.116	70.0401	99.0799	0.4	0.5
487	Trichlorfon	C4H8Cl3O4P	52-68-6	256.93	109.005	78.9942	0.8	1
488	Tricyclazole	C9H7N3S	41814-78-2	190.043	136.022	163.033	0.2	0.25
489	Trifloxystrobin	C20H19F3N2O4	141517-21-7	409.137	186.053	116.05	0.4	0.5
490	Triflumizole	C15H15ClF3N3O	68694-11-1	346.093	73.0647	278.056	0.4	0.5
491	Triflumuron	C15H10ClF3N2O3	64628-44-0	359.04	156.021	138.995	0.8	1
492	Triticonazole	C17H20ClN3O	131983-72-7	318.137	70.0401	125.015	0.4	0.5
493	Vamidothion	C8H18NO4PS2	2275-23-2	288.049	118.032	146.064	0.2	0.25
494	Zoxamide	C14H16Cl3NO2	156052-68-5	336.032	186.971	203.998	0.2	0.25
495	Acemetacin	C21H18ClNO6	53164-05-9	416.09	138.995	111	0.6	0.75
496	Alacepril	C20H26N2O5S	74258-86-9	407.164	70.0651	145.032	0.030303	0.0378788
497	Alprenolol	C15H23NO2	13707-88-5	250.18	116.107	56.0495	0.6	0.75
498	Amantadine	C10H17N	665-66-7	152.143	135.117	79.0542	0.30303	0.378788
499	Amlodipine besilate	C20H25ClN2O5	111470-99-6	409.152	238.063	206.037	0.6	0.75
500	Azelastine	C22H24ClN3O	58581-89-8	382.168	112.112	58.065	0.151515	0.189394
501	Benidipine	C28H31N3O6	91599-74-5	506.229	174.128	315.098	0.00606061	0.00757576
502	Butyl methoxydibenzoylmethane (BMDM)	C20H22O3	70356-09-1	311.164	161.096	135.044	0.0606061	0.0757576
503	Candesartan	C24H20N6O3	139481-59-7	441.167	207.092	192.081	0.00606061	0.00757576
504	Carvedilol	C24H26N2O4	72956-09-3	407.197	222.091	224.128	0.0151515	0.0189394
505	Diclofenac	C14H11Cl2NO2	15307-79-6	296.024	214.042	215.049	0.030303	0.0378788
506	Diphenhydramine	C17H21NO	147-24-0, 58-73-1	256.17	167.085	165.07	0.0606061	0.0757576
507	Diphenylpyraline	C19H23NO	132-18-3	282.185	167.086	165.07	0.030303	0.0378788
508	Doxazosin mesilate	C23H25N5O5	74191-85-8	452.193	344.172	247.119	0.151515	0.189394
509	Etizolam	C17H15ClN4S	40054-69-1	343.078	314.039	259.022	0.0606061	0.0757576
510	Fenbufen	C16H14O3	36330-85-5	255.102	181.065	153.07	0.0606061	0.0757576
511	Fluvoxamine maleate	C15H21F3N2O2	61718-82-9	319.163	71.0491	200.068	0.6	0.75
512	Glibenclamide	C23H28ClN3O5S	10238-21-8	494.151	169.005	369.067	0.030303	0.0378788
513	Gliclazide	C15H21N3O3S	21187-98-4	324.138	110.096	127.123	0.030303	0.0378788
514	Hydralazine	C8H8N4	304-20-1	161.082	89.0384	161.082	60	75
515	Hydrochlorothiazide	C7H8ClN3O4S2	58-93-5	314.998	280.943	232.978	1.5	1.875
516	Ketotifen fumarate	C19H19NOS	34580-14-8	310.126	96.0807	234.049	0.0151515	0.0189394
517	Lisinopril	C21H31N3O5	76547-98-3	406.234	84.0806	246.149	15	18.75
518	Methyldopa, alpha-Methyldopa sesquihydrate	C10H13NO4	41372-08-1	212.092	139.039	166.086	30	37.5
519	Nateglinide	C19H27NO3	105816-04-4	318.206	120.081	69.0699	0.30303	0.378788
520	Nicardipine	C26H29N3O6	54527-84-3	480.213	315.097	148.112	0.030303	0.0378788
521	Nifedipine	C17H18N2O6	21829-25-4	347.124	254.105	195.092	0.030303	0.0378788
522	Nilvadipine	C19H19N3O6	75530-68-6	386.135	326.078	312.061	1.5	1.875
523	Olanzapine	C17H20N4S	132539-06-1	313.148	256.09	213.048	0.030303	0.0378788
524	Pindolol	C14H20N2O2	13523-86-9	249.16	116.107	144.081	0.030303	0.0378788
525	Pioglitazone	C19H20N2O3S	112529-15-4	357.127	134.096	119.073	0.0606061	0.0757576
526	Piroxicam	C15H13N3O4S	36322-90-4	332.07	95.0604	121.04	0.0151515	0.0189394
527	Prazosin	C19H21N5O4	19237-84-4	384.167	247.119	138.055	0.0151515	0.0189394
528	Quetiapine fumarate	C21H25N3O2S	111974-72-2	384.174	253.079	221.107	0.0030303	0.00378788
529	Rescinnamine	C35H42N2O9	24815-24-5	635.296	221.081	397.213	0.00606061	0.00757576
530	Risperidone	C23H27FN4O2	106266-06-2	411.219	191.118		0.0151515	0.0189394
531	Salicylamide	C7H7NO2	65-45-2	138.055	121.028	65.03	3.0303	3.78788
532	Sulindac	C20H17FO3S	38194-50-2	357.096	233.077	340.094	0.030303	0.0378788
533	Tenoxicam	C13H11N3O4S2	59804-37-4	338.026	121.04	95.0604	0.0151515	0.0189394
534	Terfenadine	C32H41NO2	50679-08-8	472.321	436.3	454.31	0.0030303	0.00378788
535	Tiaramide	C15H18ClN3O3S	32527-55-2	356.083	197.978	169.983	0.030303	0.0378788
536	Tofisopam	C22H26N2O4	22345-47-7	383.197	342.17	313.131	0.0151515	0.0189394
537	Tolazamide	C14H21N3O3S	1156-19-0	312.138	115.123	91.0542	0.0151515	0.0189394
538	Tolmetin	C15H15NO3	26171-23-3	258.112	119.049	91.0542	3.0303	3.78788
539	Tranilast	C18H17NO5	53902-12-8	328.118	191.071	163.075	1.5	1.875
540	Trihexyphenidyl	C20H31NO	58947-95-8	302.248	98.0964	70.0651	0.30303	0.378788
*: Instrument detection limit when injecting 2 mL.
**: Method detection limit when concentrating 200 mL of sample water to 0.5 mL.

## Sheet: Table S4
Table S4 List of Internal standard
No.	Instrument	Name
Internal standard for AIQS with GC-MS
1	GC/MS	4-Chlorotoluene-d4
2	GC/MS	4-Chlorotoluene-d4
3	GC/MS	1,4-Dichlorobenzene-d4
4	GC/MS	Naphthalene-d8
5	GC/MS	Acenaphthene-d10
6	GC/MS	Phenanthrene-d10
7	GC/MS	Fluoranthene-d10
8	GC/MS	Chrysene-d12
9	GC/MS	Perylene-d12
Internal standard for AIQS with LC-QTOFMS
1	LC-QTOF-MS	Methamidophos-d6
2	LC-QTOF-MS	Methomyl-d3
3	LC-QTOF-MS	Carbendazim-d4
4	LC-QTOF-MS	Pirimicarb-d6
5	LC-QTOF-MS	Imazalil-d5
6	LC-QTOF-MS	Ethofenprox-d5

## Sheet: Table S5
Table S5 GC-MS conditions
GC-MS: Shimadzu GCMS-QP 2010 Plus
Column: Agilent DB-5ms, 30m×0.25mm i.d.; film 0.25µm)
Temperature
Column: temperature programmed: 2 min at 40°C, 8°C/min to 310°C, 5 min at 310°C
Injector: 250°C
Transfer line: 300°C
Ion source: 200°C
Injection method: splitless, 1 min for purge-off time, without glasswool
Carrier gas: He
Linear velocity: 40 cm/s, constant flow mode
Ionization method: EI
Tuning method: target tuning for US EPA method 625
Measurement method: Scan
Scan range: 45 amu to 600 amu
Scan rate: 0.3 s/scan

## Sheet: Table S6
Table S6 LC-QTOF-MS conditions
Parameter	Details
Equipment	Sciex ExionLC/ Sciex X500R
Flow rate	0.3 mL min-1
LC column	GL Science Inertsil ODS-4 HP(150 mm,2.1 mm,3 µm)
Mobile phase	Solvent A: 5mM ammonium acetate in water
	Solvent B: 5mM ammonium acetate in methanol
Colmn temp.(℃)	40
Gradient profile	Time, min	0	30-40	40.01-50
	B, %	5	95	5
Injection Volume	2 µL
Ion source	TurbolonSpray
Ionization	ESI-positive
Source temp.(℃)	350
Measurement mode	SWATH
TOF-MS (scan range)	50–1000 Da, 0.1 s
TOF MS/MS	50–1000 Da, 22 ranges, 0.07 s each
Collision energy ramp	20V-50V

## Sheet: Table S7
Table S7 Recovery of standard samples of QC tests for AIQS with GC-MS and LC-QTOFMS
No.	Instrument	Compound	CAS RN	Log P	Average, %	RSD a, %
Mixtures of 66 pesticide standards (Kanto Chemical Co.) for AIQS with GC-MS
1	GC-MS	Dichlorvos (DDVP)	62-73-7	1.43	76.488	4.842
2	GC-MS	Dichlobenil	1194-65-6	2.74	84.9801	3.13817
3	GC-MS	Etridiazole (Echlomezol)	2593-15-9	3.37	90.301	13.8285
4	GC-MS	Trichlorfon	52-68-6	0.51	n.d	-
5	GC-MS	Chloroneb	2675-77-6	3.44	79.7986	4.81415
6	GC-MS	Isoprocarb	2631-40-5	2.31	100.281	4.42357
7	GC-MS	Molinate	2212-67-1	3.21	80.2508	3.12087
8	GC-MS	Fenobucarb	3766-81-2	2.8	101.802	3.25725
9	GC-MS	Trifluralin	1582-09-8	5.34	82.5339	16.007
10	GC-MS	Benfluralin	1861-40-1	5.29	96.5386	7.63605
11	GC-MS	Pencycron	66063-05-6	4.8	98.7381	15.4122
12	GC-MS	Dimethoate	60-51-5	0.78	90.5356	6.91919
13	GC-MS	Simazine (CAT)	122-34-9	2.18	98.7322	8.01419
14	GC-MS	Atrazine	1912-24-9	2.61	108.968	4.3463
15	GC-MS	Propyzamide	23950-58-5	3.43	89.4636	6.48361
16	GC-MS	Pyroquilon	57369-32-1	1.57	86.1261	2.55992
17	GC-MS	Diazinon	333-41-5	3.81	96.7987	5.27248
18	GC-MS	Chlorothalonil (TPN)	1897-45-6	3.05	61.0579	5.11862
19	GC-MS	Disulfoton	298-04-4	4.02	73.3807	4.53006
20	GC-MS	Iprobenfos (IBP)	26087-47-8	3.34	90.1927	1.15568
21	GC-MS	Terbcarb (MBPMC)	1918-11-2	5.2	92.7842	4.387
22	GC-MS	Bromobutide	74712-19-9	3.5	94.6927	4.13377
23	GC-MS	Tolclofos-methyl	57018-04-9	4.56	86.5843	3.46806
24	GC-MS	Alachlor	15972-60-8	3.52	97.9964	4.47889
25	GC-MS	Simetryn	1014-70-6	2.5	85.0966	3.86787
26	GC-MS	Metalaxyl	57837-19-1	1.6	103.829	11.0839
27	GC-MS	Dithiopyr	97886-45-8	4.75	90.7508	2.58987
28	GC-MS	Fenitrothion (MEP)	122-14-5	3.3	109.071	14.9279
29	GC-MS	Esprocarb	85785-20-2	4.6	99.9785	7.33799
30	GC-MS	Malathion	121-75-5	2.36	114.955	9.47543
31	GC-MS	Chlorpyrifos	2921-88-2	4.96	92.3845	10.7831
32	GC-MS	Thiobencarb	28249-77-6	3.4	93.1137	3.90807
33	GC-MS	Fenthion	55-38-9	4.09	90.117	2.73799
34	GC-MS	Fthalide	27355-22-2	3.2	73.7661	3.22622
35	GC-MS	Pendimethalin	40487-42-1	5.2	83.3686	12.2021
36	GC-MS	Dimethametryn	22936-75-0	3.9	92.8415	3.02474
37	GC-MS	Isofenphos	25311-71-1	4.12	106.669	6.85371
38	GC-MS	Methyl dymron	42609-73-4	3.4	88.1674	5.66705
39	GC-MS	Phenthoate	2597-03-7	3.7	88.5031	12.0863
40	GC-MS	Captan	133-06-2	2.8	76.533	3.20998
41	GC-MS	Procymidone	32809-16-8	3	92.1529	5.14794
42	GC-MS	Dimepiperate	61432-55-1	3.6	89.2034	2.9642
43	GC-MS	Methidathion	950-37-8	2.2	89.8104	7.74741
44	GC-MS	Butamifos	36335-67-8	4.7	74.7291	13.2361
45	GC-MS	Napropamide	15299-99-7	3.36	83.4776	11.1677
46	GC-MS	Flutolanil	66332-96-5	3.7	95.775	5.42397
47	GC-MS	Pretilachlor	51218-49-6	4.1	90.2829	2.90706
48	GC-MS	Isoprothiolane	50512-35-1	2.88	90.7782	7.30224
49	GC-MS	Buprofezin	69327-76-0	4.93	92.1718	7.73547
50	GC-MS	Isoxathion	18854-01-8	3.73	100.114	19.6877
51	GC-MS	Mepronil	55814-41-0	3.7	85.3001	4.52559
52	GC-MS	Chlornitrofen (CNP)	1836-77-7	4.7	84.0595	13.7118
53	GC-MS	Edifenphos	17109-49-8	3.48	98.8188	1.64726
54	GC-MS	Propiconazole 2	60207-90-1	3.72	95.1642	12.2718
55	GC-MS	Thenylchlor	96491-05-3	3.8	88.2425	4.384
56	GC-MS	Pyributicarb	88678-67-5	5.2	90.5206	5.1219
57	GC-MS	Pyridaphenthion	119-12-0	3.3	69.6855	7.44171
58	GC-MS	Iprodione	36734-19-7	3	84.1035	10.6941
59	GC-MS	EPN	2104-64-5	4.78	85.7355	11.1279
60	GC-MS	Piperophos	24151-93-7	4.2	97.807	6.99549
61	GC-MS	Anilofos	64249-01-0	3.8	91.9264	13.5463
62	GC-MS	Bifenox	42576-02-3	4.48	87.1303	15.9618
63	GC-MS	Pyriproxyfen	95737-68-1	5.37	83.8458	4.28006
64	GC-MS	Mefenacet	73250-68-7	3.2	101.174	6.67386
65	GC-MS	Cafenstrole	125306-83-4	2.9	100.744	6.21459
66	GC-MS	Etofenprox	80844-07-1	7	81.3086	3.1203
LC Multiresidue Pesticide Standards Kit (204 pesticides - Restek Corp.) for AIQS with LC-QTOFMS
1	LC-QTOFMS	3-Hydroxycarbofuran	16655-82-6	1.2	102.053	2.85952
2	LC-QTOFMS	Acephate	30560-19-1	-0.85	83.1834	4.08496
3	LC-QTOFMS	Acetamiprid	135410-20-7	0.8	114.012	1.62347
4	LC-QTOFMS	Acibenzolar-S-methyl	135158-54-2	2.3	90.08	11.4231
5	LC-QTOFMS	Alanycarb	83130-01-2	3.57	n.d	-
6	LC-QTOFMS	Aldicarb	116-06-3	3.1	95.6168	4.19337
7	LC-QTOFMS	Aldicarb sulfone	1646-88-4	-0.6	91.0074	7.99857
8	LC-QTOFMS	Aldicarb sulfoxide	1646-87-3	-0.2	93.0325	17.2651
9	LC-QTOFMS	Ametryn	834-12-8	2.98	90.33	8.75809
10	LC-QTOFMS	Aminocarb	2032-59-9	1.9	103.495	6.29095
11	LC-QTOFMS	Avermectin B1a	71751-41-2	3.8	39.883	16.1734
12	LC-QTOFMS	Avermectin B1b	71751-41-2	3.8	n.d	-
13	LC-QTOFMS	Azoxystrobin	131860-33-8	2.5	101.958	3.43001
14	LC-QTOFMS	Benalaxyl	71626-11-4	3.4	89.8979	6.59179
15	LC-QTOFMS	Bendiocarb	22781-23-3	1.7	93.1324	9.38856
16	LC-QTOFMS	Benfuracarb	82560-54-1	4.2	68.4831	3.55663
17	LC-QTOFMS	Benzoximate	29104-30-1	4.7	72.2135	6.60032
18	LC-QTOFMS	Bifenazate	149877-41-8	3.4	76.5005	4.3432
19	LC-QTOFMS	Bitertanol	55179-31-2	4.2	88.3905	6.39931
20	LC-QTOFMS	Boscalid	188425-85-6	2.96	96.6894	3.14941
21	LC-QTOFMS	Bromucanozole Isomer 1	116255-48-2	3.24	87.1954	8.09368
22	LC-QTOFMS	Bromucanozole Isomer 2	116255-48-2	3.24	80	1
23	LC-QTOFMS	Bupirimate	41483-43-6	2.7	92.1251	3.05499
24	LC-QTOFMS	Buprofezin	69327-76-0	4.93	60.7334	5.05075
25	LC-QTOFMS	Butafenacil	134605-64-4	3.5	87.85	4.93711
26	LC-QTOFMS	Butocarboxim	34681-10-2	1.1	n.d	-
27	LC-QTOFMS	Carbaryl	63-25-2	2.36	94.7723	14.7582
28	LC-QTOFMS	Carbendazim	10605-21-7	1.52	99.7935	9.29983
29	LC-QTOFMS	Carbetamide	16118-49-3	1.6	94.9682	0.899765
30	LC-QTOFMS	Carbofuran	1563-66-2	2.32	99.4093	5.48207
31	LC-QTOFMS	Carboxin	5234-68-4	2.14	86.9257	2.75899
32	LC-QTOFMS	Carfentrazone-ethyl	128639-02-1	3.36	92.8284	5.02005
33	LC-QTOFMS	Chlorantraniliprole	500008-45-7	2.76	103.571	2.06454
34	LC-QTOFMS	Chlorfluazuron	71422-67-8	6.7	43.8292	6.86936
35	LC-QTOFMS	Chlorotoluron	15545-48-9	2.41	97.3905	5.16297
36	LC-QTOFMS	Chloroxuron	1982-47-4	3.5	97.3905	5.16297
37	LC-QTOFMS	Clethodim	99129-21-2	4.18	98.7161	6.44512
38	LC-QTOFMS	Clofentezine	74115-24-5	3.2	33.1827	3.53452
39	LC-QTOFMS	Clothianidin	210880-92-5	0.7	94.794	3.58173
40	LC-QTOFMS	Cyazofamid	120116-88-3	3.2	89.3146	7.39547
41	LC-QTOFMS	Cycluron	2163-69-1	2.4	105.964	6.20176
42	LC-QTOFMS	Cymoxanil	57966-95-7	0.67	101.458	2.80113
43	LC-QTOFMS	Cyproconazole Isomer 1	94361-06-5	2.9	87.2057	5.56509
44	LC-QTOFMS	Cyprodinil	121552-61-2	3.59	80.2905	6.80871
45	LC-QTOFMS	Cyromazine	66215-27-8	-0.06	85.5436	7.03065
46	LC-QTOFMS	Desmedipham	13684-56-5	3.4	78.0458	3.91912
47	LC-QTOFMS	Diclobutrazol	75736-33-3	3.8	85.423	1.52564
48	LC-QTOFMS	Dicrotophos	141-66-2	0	81.5708	9.77924
49	LC-QTOFMS	Diethofencarb	87130-20-9	2.8	94.4778	7.84839
50	LC-QTOFMS	Difenoconazole Isomer 1	119446-68-3	4.4	78.8262	11.6993
51	LC-QTOFMS	Diflubenzuron	35367-38-5	3.89	94.2939	3.09022
52	LC-QTOFMS	Dimethoate	60-51-5	0.78	77.4195	6.83009
53	LC-QTOFMS	Dimethomorph Isomer 1	110488-70-5	2.63	90.278	2.03913
54	LC-QTOFMS	Dimethomorph Isomer 2	110488-70-5	2.73	90.3165	2.05527
55	LC-QTOFMS	Dimoxystrobin	149961-52-4	3.9	92.7673	4.42566
56	LC-QTOFMS	Diniconazole	83657-24-3	4.2	84.0499	2.3603
57	LC-QTOFMS	Dinotefuran	165252-70-0	-0.64	108.649	9.70207
58	LC-QTOFMS	Dioxacarb	6988-21-2	0.57	n.d	-
59	LC-QTOFMS	Diuron	330-54-1	2.68	103.605	5.93404
60	LC-QTOFMS	Doramectin	117704-25-3	7.16	38.3214	15.4283
61	LC-QTOFMS	Emamectin-benzoate	138511-97-4	5	36.2526	18.3551
62	LC-QTOFMS	Epoxiconazole	133855-98-8	3.2	85.4753	4.0769
63	LC-QTOFMS	Eprinomectin	133305-88-1	5.4	36.1512	16.3999
64	LC-QTOFMS	Etaconazole	60207-93-4	3	97.521	6.0091
65	LC-QTOFMS	Ethiofencarb	29973-13-5	2.04	72.6986	3.78079
66	LC-QTOFMS	Ethiprole	181587-01-9	3.7	94.2787	6.3269
67	LC-QTOFMS	Ethirimol	23947-60-6	1.7	93.8798	4.74677
68	LC-QTOFMS	Ethofumesate	26225-79-6	2.7	93.1372	1.93412
69	LC-QTOFMS	Etoxazole	153233-91-1	5.59	54.7897	5.01371
70	LC-QTOFMS	Famoxadone	131807-57-3	4.65	82.4471	10.5825
71	LC-QTOFMS	Fenamidone	161326-34-7	4.1	100.167	4.95875
72	LC-QTOFMS	Fenarimol	60168-88-9	3.6	99.0113	3.7688
73	LC-QTOFMS	Fenazaquin	120928-09-8	5.51	61.888	2.58776
74	LC-QTOFMS	Fenbuconazole	114369-43-6	3.2	89.5346	3.34585
75	LC-QTOFMS	Fenhexamid	126833-17-8	3.51	91.9563	2.94419
76	LC-QTOFMS	Fenobucarb	3766-81-2	2.8	101.002	4.30639
77	LC-QTOFMS	Fenoxycarb	79127-80-3	4.3	84.2438	6.03727
78	LC-QTOFMS	Fenpropimorph	67564-91-4	5.2	68.3777	12.1037
79	LC-QTOFMS	Fenpyroximate	134098-61-6	5.01	41.9826	3.96898
80	LC-QTOFMS	Fenuron	101-42-8	1	112.159	3.31936
81	LC-QTOFMS	Fipronil	120068-37-3	4	93.0253	2.34632
82	LC-QTOFMS	Flonicamid	158062-67-0	0.3	104.98	6.37233
83	LC-QTOFMS	Flubendiamide	272451-65-7	4.2	75.7026	6.77968
84	LC-QTOFMS	Fludioxinil	131341-86-1	4.12	89.6685	4.66313
85	LC-QTOFMS	Flufenacet	142459-58-3	3.2	89.7279	3.68059
86	LC-QTOFMS	Flufenoxuron	101463-69-8	6.16	46.7278	1.92514
87	LC-QTOFMS	Fluometuron	2164-17-2	2.42	99.2723	7.74545
88	LC-QTOFMS	Fluoxastrobin	361377-29-9	2.86	92.1853	3.69614
89	LC-QTOFMS	Fluquinconazole	136426-54-5	4	87.4571	4.69975
90	LC-QTOFMS	Flusilazole	85509-19-9	3.7	88.2546	0.80683
91	LC-QTOFMS	Flutolanil	66332-96-5	3.7	95.1069	2.97142
92	LC-QTOFMS	Flutriafol	76674-21-0	2.3	94.8395	7.01358
93	LC-QTOFMS	Forchlorfenuron	68157-60-8	3.2	100.729	6.05684
94	LC-QTOFMS	Formetanate HCl	23422-53-9	-	69	18
95	LC-QTOFMS	Fuberidazole	3878-19-1	2.2	105.816	3.52571
96	LC-QTOFMS	Furalaxyl	57646-30-7	2.6	96.4598	6.95217
97	LC-QTOFMS	Furathiocarb	65907-30-4	4.7	73.7392	4.24899
98	LC-QTOFMS	Halofenozide	112226-61-6	3.22	86.3019	1.95015
99	LC-QTOFMS	Hexaconazole	79983-71-4	3.7	89.5091	5.05648
100	LC-QTOFMS	Hexaflumuron	86479-06-3	5.68	58.2945	17.8997
101	LC-QTOFMS	Hexythiazox	78587-05-0	4.5	60.4853	4.45566
102	LC-QTOFMS	Hydramethylnon	67485-29-4	2.31	31.2279	10.6624
103	LC-QTOFMS	Imazalil	35554-44-0	3.82	95.7216	6.41
104	LC-QTOFMS	Imidacloprid	138261-41-3	0.57	105.364	8.38676
105	LC-QTOFMS	Indoxacarb	144171-61-9	4.65	60.3087	6.67089
106	LC-QTOFMS	Ipconazole Isomer 1	125225-28-7	4.1	79.698	6.23688
107	LC-QTOFMS	Iprovalicarb Isomer 1	140923-17-7	3.7	86.4835	3.15385
108	LC-QTOFMS	Isocarbophos	24353-61-5	2.4	97.6872	4.69189
109	LC-QTOFMS	Isoprocarb	2631-40-5	2.31	97.3924	1.23988
110	LC-QTOFMS	Isoproturon	34123-59-6	2.87	100.079	2.66874
111	LC-QTOFMS	Ivermectin	70288-86-7	4.1	38.2216	7.86958
112	LC-QTOFMS	Kresoxim-methyl	143390-89-0	3.4	92.1997	4.24287
113	LC-QTOFMS	Linuron	330-55-2	3.2	94.8627	4.25182
114	LC-QTOFMS	Lufenuron	103055-07-8	5.12	42.6135	7.69366
115	LC-QTOFMS	Mandipropamid	374726-62-2	3.2	90.4726	3.84171
116	LC-QTOFMS	Mefenacet	73250-68-7	3.2	87.7773	5.15368
117	LC-QTOFMS	Mepanipyrim	110235-47-7	3.3	92.3329	2.73802
118	LC-QTOFMS	Mepronil	55814-41-0	3.7	95.299	5.45225
119	LC-QTOFMS	Mesotrione	104206-82-8	0.11	82.8698	11.9665
120	LC-QTOFMS	Metaflumizone	139968-49-3	4.6	43.5669	10.3338
121	LC-QTOFMS	Metalaxyl	57837-19-1	1.6	99.9896	4.67178
122	LC-QTOFMS	Metconazole	125116-23-6	3.7	84.3786	5.55311
123	LC-QTOFMS	Methabenzthiazuron	18691-97-9	1.9	93.3132	5.99043
124	LC-QTOFMS	Methamidophos	10265-92-6	-0.8	59	11
125	LC-QTOFMS	Methiocarb	2032-65-7	2.92	97.7616	2.68829
126	LC-QTOFMS	Methomyl	16752-77-5	0.6	105.883	4.9778
127	LC-QTOFMS	Methoprotryne	841-06-5	2.8	97.0212	2.84334
128	LC-QTOFMS	Methoxyfenozide	161050-58-4	3.7	91.5907	7.50269
129	LC-QTOFMS	Metobromuron	3060-89-7	2.4	102.578	6.83437
130	LC-QTOFMS	Metribuzin	21087-64-9	1.7	98.1565	5.54006
131	LC-QTOFMS	Mevinphos Isomer 1	7786-34-7	0.13	106.067	7.31865
132	LC-QTOFMS	Mexacarbate	315-18-4	2.5	84.1411	3.02633
133	LC-QTOFMS	Monocrotophos	6923-22-4	-0.2	85.752	11.228
134	LC-QTOFMS	Monolinuron	1746-81-2	2.3	89.3504	4.8546
135	LC-QTOFMS	Moxidectin	113507-06-5	6	43.3249	4.81298
136	LC-QTOFMS	Myclobutanil	88671-89-0	2.94	94.2456	6.06666
137	LC-QTOFMS	Neburon	555-37-3	3.8	86.7933	2.93233
138	LC-QTOFMS	Nitenpyram	120738-89-8	-0.66	102.012	6.40137
139	LC-QTOFMS	Novaluron	116714-46-6	5.27	43.5776	5.20498
140	LC-QTOFMS	Nuarimol	63284-71-9	2.2	92.6194	6.43238
141	LC-QTOFMS	Omethoate	1113-02-6	-0.74	65.0753	27
142	LC-QTOFMS	Oxadixyl	77732-09-3	1.8	99.3924	5.4628
143	LC-QTOFMS	Oxamyl	23135-22-0	-0.47	98.2956	6.15228
144	LC-QTOFMS	Penconazole	66246-88-6	4.4	87.1121	8.41409
145	LC-QTOFMS	Pencycuron	66063-05-6	4.68	80.4127	4.0597
146	LC-QTOFMS	Phenmedipham	13684-63-4	3.6	85.9868	5.12302
147	LC-QTOFMS	Picoxystrobin	117428-22-5	3.6	95.4016	6.01973
148	LC-QTOFMS	Piperonyl butoxide	51-03-6	4.75	68.8325	5.53866
149	LC-QTOFMS	Pirimicarb	23103-98-2	1.7	99.3192	2.72497
150	LC-QTOFMS	Prochloraz	67747-09-5	4.6	90.3974	4.98958
151	LC-QTOFMS	Promecarb	2631-37-0	3.1	89.075	5.38905
152	LC-QTOFMS	Prometon	1610-18-0	2.99	95.6599	8.08764
153	LC-QTOFMS	Prometryne	7287-19-6	3.51	85.7025	5.80467
154	LC-QTOFMS	Propamocarb	24579-73-5	1.12	96.0528	5.65277
155	LC-QTOFMS	Propargite	2312-35-8	5.7	52.0133	3.28152
156	LC-QTOFMS	Propham	122-42-9	2.6	94.2746	10.4914
157	LC-QTOFMS	Propiconazole	60207-90-1	3.72	87.3309	5.39959
158	LC-QTOFMS	Propoxur	114-26-1	1.52	98.2944	7.63921
159	LC-QTOFMS	Prothioconazole	178928-70-6	3.82	52.4947	1.14493
160	LC-QTOFMS	Pymetrozine	123312-89-0	-0.18	102.329	9.9627
161	LC-QTOFMS	Pyracarbolid	24691-76-7	2.7	91.9314	9.31866
162	LC-QTOFMS	Pyraclostrobin	175013-18-0	3.99	77.5303	5.05745
163	LC-QTOFMS	Pyridaben	96489-71-3	6.37	49.7294	1.20069
164	LC-QTOFMS	Pyrimethanil	53112-28-0	2.84	89.56	8.89761
165	LC-QTOFMS	Pyriproxyfen	95737-68-1	5.37	54.0087	5.76353
166	LC-QTOFMS	Quinoxyfen	124495-18-7	4.66	49.4379	3.97335
167	LC-QTOFMS	Rotenone	83-79-4	4.1	84.1074	8.69184
168	LC-QTOFMS	Secbumeton	26259-45-0	3.2	95.6433	5.49032
169	LC-QTOFMS	Siduron	1982-49-6	3.8	97.3305	12.2775
170	LC-QTOFMS	Simetryn	1014-70-6	2.5	97.774	4.29517
171	LC-QTOFMS	Spinetoram	935545-74-7	4.09	36.1775	6.76605
172	LC-QTOFMS	Spinosad (Spinosyn A)	131929-60-7	4	39.0025	7.52842
173	LC-QTOFMS	Spinosad (Spinosyn D)	131929-63-0	4.5	33.341	11.0557
174	LC-QTOFMS	Spirodiclofen	148477-71-8	5.83	45.0405	8.43133
175	LC-QTOFMS	Spiromesifen	283594-90-1	4.55	41.7493	10.2247
176	LC-QTOFMS	Spirotetramat	203313-25-1	3.2	91.9782	5.0687
177	LC-QTOFMS	Spiroxamine Isomer 1	118134-30-8	4.2	85.0921	7.35173
178	LC-QTOFMS	Sulfentrazone	122836-35-5	0.99	103.436	7.13373
179	LC-QTOFMS	Tebuconazole	107534-96-3	3.7	87.0538	3.71927
180	LC-QTOFMS	Tebufenozide	112410-23-8	4.25	90.7686	4.52747
181	LC-QTOFMS	Tebufenpyrad	119168-77-3	4.93	70.1948	7.27691
182	LC-QTOFMS	Tebuthiuron	34014-18-1	1.79	104.045	3.93857
183	LC-QTOFMS	Teflubenzuron	83121-18-0	4.9	85.6923	11.0057
184	LC-QTOFMS	Temephos	3383-96-8	5.96	49.2229	5.94749
185	LC-QTOFMS	Terbumeton	33693-04-8	3.1	94.5097	4.41918
186	LC-QTOFMS	Terbutryn	886-50-0	3.74	98.6741	0.761602
187	LC-QTOFMS	Tetraconazole	112281-77-3	3.56	89.4084	6.16266
188	LC-QTOFMS	Thiabendazole	148-79-8	2.47	109.321	0.604035
189	LC-QTOFMS	Thiacloprid	111988-49-9	1.26	100.265	3.34053
190	LC-QTOFMS	Thiamethoxam	153719-23-4	-0.13	104.024	11.8679
191	LC-QTOFMS	Thidiazuron	51707-55-2	1.77	98.2076	7.07952
192	LC-QTOFMS	Thiobencarb	28249-77-6	3.4	72.6713	3.26203
193	LC-QTOFMS	Thiofanox	39196-18-4	-1.67	n.d	-
194	LC-QTOFMS	Thiophanate-methyl	23564-05-8	1.4	82.1226	6.01184
195	LC-QTOFMS	Triadimefon	43121-43-3	2.77	90.0853	6.95184
196	LC-QTOFMS	Triadimenol	55219-65-3	2.9	88.5377	5.02089
197	LC-QTOFMS	Trichlorfon	52-68-6	0.51	21.9505	17.6497
198	LC-QTOFMS	Tricyclazole	41814-78-2	1.7	106.296	5.34043
199	LC-QTOFMS	Trifloxystrobin	141517-21-7	4.5	70.8575	4.50758
200	LC-QTOFMS	Triflumizole	68694-11-1	5.1	73.3409	2.24367
201	LC-QTOFMS	Triflumuron	64628-44-0	5.6	79.8467	6.77469
202	LC-QTOFMS	Triticonazole	131983-72-7	3.29	84.8778	2.71726
203	LC-QTOFMS	Vamidothion	2275-23-2	0.3	87.3449	13.7738
204	LC-QTOFMS	Zoxamide	156052-68-5	3.76	90.3804	4.58807
a RSD: relative standard deviation n.d: not detected

## Sheet: Table S8
Table S8 Concentration of detected chemicals in blank samples (ng/L)
No.	Compounds	Detector	Procedure blank (n=3)
			Mean ng/L (n=3)
1	1,3-Dimethylnaphthalene	GC-MS	4.84
2	1,4-&2,3-Dimethylnaphthalene	GC-MS	3.58
3	2,6-Diisopropylnaphthalene	GC-MS	10.5267
4	2,6-Dimethylnaphthalene	GC-MS	2.7
5	2,6-Di-tert-butyl-4-benzoquinone	GC-MS	3.27333
6	2-Ethyl-1-hexanol	GC-MS	54.5333
7	2-Methylphenol	GC-MS	2.19333
8	3-&4-Methylphenol	GC-MS	1.49333
9	3,5-Dimethylphenol	GC-MS	9.89333
10	4-Cymene	GC-MS	2.00667
11	Acenaphthylene	GC-MS	0.64
12	Acetophenone	GC-MS	193.28
13	Benzophenone	GC-MS	10.9067
14	Benzothiazole	GC-MS	1189.53
15	Benzyl alcohol	GC-MS	31.7867
16	Bis(2-ethylhexyl)phthalate	GC-MS	656.88
17	Caffeine	GC-MS	3.99333
18	Di(2-ethylhexyl)adipate	GC-MS	50.2733
19	Diethyltoluamide	GC-MS	3.33333
20	Di-iso-butyl phthalate	GC-MS	257.153
21	Dimethyl phthalate	GC-MS	102.587
22	Di-n-butyl phthalate	GC-MS	713.253
23	Ethanol, 2-phenoxy-	GC-MS	12.82
24	Isophorone	GC-MS	38.4533
25	Nitrobenzene	GC-MS	1.43333
26	Pentamethylbenzene	GC-MS	16.2867
27	Tributyl phosphate, TBP	GC-MS	33.4
28	Cyprodinil	LC-QTOF-MS	0.196811
29	Ethylhexyl methoxycinnamate (EHMC, OMC)	LC-QTOF-MS	86.955
30	Theophylline	LC-QTOF-MS	19.4438
31	Trisbutyl phosphate (TNBP)	LC-QTOF-MS	16.9542
32	Trisisobutyl phosphate (TIBP)	LC-QTOF-MS	39.1887

## Sheet: Table S9
Table S9 Chronic daily intake (CDI) and risk quotient (RQ) of OMPs in groundwater in northen Vietnam
Name	CDI (mg/kg.day)																			RfD (mg/kg.day)	RQ
	G1	G2	G3	G4	G5	G6	G7	G8	G9	G10	G11	G12	G13	G14	G15	G16	G17	G18	G19		G1	G2	G3	G4	G5	G6	G7	G8	G9	G10	G11	G12	G13	G14	G15	G16	G17	G18	G19
3-Hydroxycarbofuran	5.63333e-05	0	0	0	0	0	0	6.56667e-05	0	7.8e-05	0	0	0	0	0	0	0	0	0	-	-	-	-	-	-	-	-	-	-	-	-	-	-	-	-	-	-	-	-
Benzoximate	0	0	0	0	0	3.93333e-08	0	0	0	0	0	0	0	0	0	0	0	0	0	-	-	-	-	-	-	-	-	-	-	-	-	-	-	-	-	-	-	-	-
Emamectin-benzoate b1a	1.04667e-07	0	0	0	0	0	0	0	0	0	0	0	0	0	0	0	0	0	0	-	-	-	-	-	-	-	-	-	-	-	-	-	-	-	-	-	-	-	-
Etoxazole	0	0	0	0	0	6.56667e-08	0	0	0	0	0	0	0	0	0	0	0	0	0	-	-	-	-	-	-	-	-	-	-	-	-	-	-	-	-	-	-	-	-
Furathiocarb	0	0	0	0	0	1.09e-07	0	0	0	0	0	0	0	0	0	0	0	0	0	-	-	-	-	-	-	-	-	-	-	-	-	-	-	-	-	-	-	-	-
Triflumuron	0	0	0	0	0	0	0	0	0	0	0	0	2.68667e-07	0	0	0	0	0	0	-	-	-	-	-	-	-	-	-	-	-	-	-	-	-	-	-	-	-	-
Carbendazim	0	0	0	1.92667e-08	0	0	0	0	0	0	0	0	0	0	0	0	0	0	0	0.0025c	-	-	-	7.70667e-06	-	-	-	-	-	-	-	-	-	-	-	-	-	-	-
Cyprodinil	0	0	0	0	2.67e-08	9e-08	0	0	0	0	0	0	0	0	0	0	0	0	0	0.17c	-	-	-	-	1.57059e-07	5.29412e-07	-	-	-	-	-	-	-	-	-	-	-	-	-
Fenazaquin	0	0	0	0	0	0	0	0	0	1.50667e-08	0	0	0	0	0	0	0	0	0	-	-	-	-	-	-	-	-	-	-	-	-	-	-	-	-	-	-	-	-
Fenpropimorph	0	0	0	0	0	2.07333e-07	0	0	0	0	0	0	0	0	0	0	0	0	0	-	-	-	-	-	-	-	-	-	-	-	-	-	-	-	-	-	-	-	-
Pencycuron	0	0	0	0	0	7.8e-08	0	0	0	0	0	0	0	0	0	0	0	0	0	-	-	-	-	-	-	-	-	-	-	-	-	-	-	-	-	-	-	-	-
Picoxystrobin	0	0	0	0	0	3.05333e-08	0	0	0	0	0	0	0	0	0	0	0	0	0	0.0154b	-	-	-	-	-	1.98268e-06	-	-	-	-	-	-	-	-	-	-	-	-	-
Trifloxystrobin	0	0	0	0	0	4.93333e-08	0	0	0	0	0	0	0	0	0	0	0	0	0	0.04c	-	-	-	-	-	1.23333e-06	-	-	-	-	-	-	-	-	-	-	-	-	-
Atrazine	0	0	0	1.66e-06	0	0	0	0	0	0	0	0	0	0	0	0	0	0	0	0.035d	-	-	-	4.74286e-05	-	-	-	-	-	-	-	-	-	-	-	-	-	-	-
Atrazine-desethyl	0	0	0	2.52e-07	0	0	0	0	0	0	0	0	0	0	0	0	0	0	0	0.0125a	-	-	-	2.016e-05	-	-	-	-	-	-	-	-	-	-	-	-	-	-	-
Diuron	0	0	0	0	0	0	0	0	0	0	0	0	1.76333e-07	0	0	0	0	0	0	0.002d	-	-	-	-	-	-	-	-	-	-	-	-	8.81667e-05	-	-	-	-	-	-
Metolachlor	0	0	0	0	0	0	9.66667e-08	0	0	0	0	0	0	0	0	0	0	0	0	0.15d	-	-	-	-	-	-	6.44444e-07	-	-	-	-	-	-	-	-	-	-	-	-
Oxabetrinil	6.16667e-07	0	0	0	0	0	0	0	0	0	0	0	0	0	0	0	0	0	0	-	-	-	-	-	-	-	-	-	-	-	-	-	-	-	-	-	-	-	-
Ethychlozate	0	0	0	0	0	0	0	0	0	0	0	0	0	0	4.3e-06	0	0	0	0	-	-	-	-	-	-	-	-	-	-	-	-	-	-	-	-	-	-	-	-
Stigmasterol	0	0	0	0	0	0	1.71333e-05	0	3.53333e-06	0	2.73667e-06	0	8.56667e-06	1.78333e-05	0	0	0	0	0	-	-	-	-	-	-	-	-	-	-	-	-	-	-	-	-	-	-	-	-
Ergosterol	0	0	0	0	0	0	0	0	9.56667e-06	0	0	0	0	0	0	0	0	0	0	-	-	-	-	-	-	-	-	-	-	-	-	-	-	-	-	-	-	-	-
Cholesterol	0	0	1.79667e-06	0	0	2.22333e-06	3.25e-06	0	7.2e-06	0	1.80333e-06	0	2.65667e-06	3.26333e-06	2.38333e-06	2.04667e-06	0	0	0	-	-	-	-	-	-	-	-	-	-	-	-	-	-	-	-	-	-	-	-
Theophylline	0	0	0	0	0	0	0	0	0	0	0	0	0	0	0	0	2.99e-06	7e-07	0	0.03a	-	-	-	-	-	-	-	-	-	-	-	-	-	-	-	-	9.96667e-05	2.33333e-05	-
2-Ethyl-1-hexanol	1.21667e-05	2.73333e-06	5.3e-06	5.23333e-06	1.87667e-06	4.03333e-06	0	3.43333e-06	3.05667e-06	8.93333e-06	6.3e-06	1.55667e-05	3.32e-06	3.53333e-06	6.5e-06	0	3.17e-06	3.76667e-06	5.43333e-06	-	-	-	-	-	-	-	-	-	-	-	-	-	-	-	-	-	-	-	-
2-phenoxy-Ethanol	0	0	0	0	0	0	0	2.79e-06	3.10667e-07	0	0	0	1.38667e-07	1.59333e-07	0	0	7.13333e-07	9.46667e-07	6.73333e-07	-	-	-	-	-	-	-	-	-	-	-	-	-	-	-	-	-	-	-	-
Diethyltoluamide (DEET)	0	0	1.94333e-07	0	0	2.58333e-07	2.85e-07	1.46333e-07	1.99667e-07	2.05667e-07	1.69e-07	1.39667e-07	0	0	0	0	1.41667e-07	1.37667e-07	1.37667e-07	0.0171b	-	-	1.13645e-05	-	-	1.51072e-05	1.66667e-05	8.5575e-06	1.16764e-05	1.20273e-05	9.88304e-06	8.16764e-06	-	-	-	-	8.2846e-06	8.05068e-06	8.05068e-06
Benzophenone	1.78333e-07	0	0	0	0	0	0	0	0	0	6.13333e-07	0	0	0	0	0	0	0	0	0.1d	1.78333e-06	-	-	-	-	-	-	-	-	-	6.13333e-06	-	-	-	-	-	-	-	-
Ethylhexyl methoxycinnamate (EHMC, OMC)	0	0	0	0	0	0	0	0	3.18e-06	0	3.56667e-06	0	0	0	0	0	0	0	0	0.005a	-	-	-	-	-	-	-	-	0.000636	-	0.000713333	-	-	-	-	-	-	-	-
Octocrylene	0	0	2.4e-06	0	0	0	3.5e-07	0	5.7e-06	1.51333e-05	2.23333e-06	0	0	0	0	0	0	0	0	-	-	-	-	-	-	-	-	-	-	-	-	-	-	-	-	-	-	-	-
Tris(1-chloro-2-propyl)phosphate (TCPP)	0	0	4.56667e-06	0	4.6e-06	0	7.83333e-06	2.09667e-06	6e-06	4.26667e-06	4.43333e-06	0	0	0	0	0	0	0	0	-	-	-	-	-	-	-	-	-	-	-	-	-	-	-	-	-	-	-	-
Tri-n-butyl phosphate (TNBP)	8e-07	0	6.6e-07	0	8.6e-07	0	0	8.8e-07	0	0	1.18667e-06	0	0	0	0	0	0	0	0	-	-	-	-	-	-	-	-	-	-	-	-	-	-	-	-	-	-	-	-
Trisisobutyl phosphate (TIBP)	1.72e-06	0	1.44333e-06	0	1.84e-06	0	0	1.88e-06	0	0	2.49333e-06	0	0	0	0	0	0	0	0	-	-	-	-	-	-	-	-	-	-	-	-	-	-	-	-	-	-	-	-
Triphenyl phospate (TPP)	2.25667e-06	9.23333e-07	0	0	0	0	3.29333e-06	0	7.06667e-07	0	1.72333e-06	8.5e-07	0	1.88667e-06	5.23333e-06	6.73333e-06	0	0	0	-	-	-	-	-	-	-	-	-	-	-	-	-	-	-	-	-	-	-	-
Butyl benzyl phthalate	0	0	0	0	5.13333e-07	0	1.78333e-06	0	1.16333e-06	8.93333e-07	6.66667e-07	5.7e-07	0	0	0	0	0	0	0	0.2c	-	-	-	-	2.56667e-06	-	8.91667e-06	-	5.81667e-06	4.46667e-06	3.33333e-06	2.85e-06	-	-	-	-	-	-	-
Di-iso-butyl phthalate	0	0	0	0	0	0	1.08333e-05	0	9.83333e-06	8.66667e-06	1.53e-05	1.75667e-05	0	0	0	0	0	0	0	0.4a	-	-	-	-	-	-	2.70833e-05	-	2.45833e-05	2.16667e-05	3.825e-05	4.39167e-05	-	-	-	-	-	-	-
Dimethyl phthalate	1e-06	1.56333e-06	2.52667e-06	1.23e-06	5.5e-06	6.06667e-07	2.96333e-06	2.92667e-06	4.06667e-06	4.16667e-06	3.10667e-06	6.7e-06	3.76667e-06	4.33333e-06	4.43333e-06	1.79333e-06	5.93333e-06	6.16667e-06	4.73333e-06	0.35a	2.85714e-06	4.46667e-06	7.21905e-06	3.51429e-06	1.57143e-05	1.73333e-06	8.46667e-06	8.3619e-06	1.1619e-05	1.19048e-05	8.87619e-06	1.91429e-05	1.07619e-05	1.2381e-05	1.26667e-05	5.12381e-06	1.69524e-05	1.7619e-05	1.35238e-05
Di-n-butyl phthalate	0	0	2.05667e-05	0	0	0	3.12333e-05	0	2.79333e-05	2.42e-05	0	0	0	0	0.00034	0	0	0	0	0.1d	-	-	0.000205667	-	-	-	0.000312333	-	0.000279333	0.000242	-	-	-	-	0.0034	-	-	-	-
Di(2-ethylhexyl)adipate	0	0	0	0	2.49333e-06	0	0	0	0	0	2.72667e-06	0	0	0	0	0	0	0	0	0.6d	-	-	-	-	4.15556e-06	-	-	-	-	-	4.54444e-06	-	-	-	-	-	-	-	-
3,5-di-tert-Butyl-4-hydroxybenzaldehyde	3.73333e-07	0	0	0	0	0	9.46667e-07	0	0	0	0	0	0	0	0	0	0	5.03333e-07	4.9e-07	-	-	-	-	-	-	-	-	-	-	-	-	-	-	-	-	-	-	-	-
2-Methylphenol	0	0	0	1.93e-07	0	0	0	0	0	0	0	0	0	0	0	0	0	0	0	-	-	-	-	-	-	-	-	-	-	-	-	-	-	-	-	-	-	-	-
Phenol	0	0	1.54667e-06	0	0	0	1.43667e-06	0	0	8.2e-07	0	0	0	0	0	0	0	0	0	0.3d	-	-	5.15556e-06	-	-	-	4.78889e-06	-	-	2.73333e-06	-	-	-	-	-	-	-	-	-
Butanoic acid, butyl ester	3.86667e-06	0	0	0	0	0	0	0	0	0	0	0	0	0	0	0	0	0	0	-	-	-	-	-	-	-	-	-	-	-	-	-	-	-	-	-	-	-	-
Bisphenol A	0	0	0	0	0	0	1.13333e-06	0	7.23333e-07	0	6.36667e-06	0	0	2.5e-06	0	0	0	0	0	0.05d	-	-	-	-	-	-	2.26667e-05	-	1.44667e-05	-	0.000127333	-	-	5e-05	-	-	-	-	-
2-(Methylthio)-benzothiazol	7e-07	0	0	0	4.6e-07	0	0	0	6.16667e-07	0	1.17333e-06	0	4.63333e-07	0	3.46667e-07	0	0	0	0	-	-	-	-	-	-	-	-	-	-	-	-	-	-	-	-	-	-	-	-
2-Methoxyphenol	0	0	0	0	0	0	0	0	1.07333e-06	0	0	0	0	0	0	0	0	0	0	-	-	-	-	-	-	-	-	-	-	-	-	-	-	-	-	-	-	-	-
Cyclohexanol	0	0	0	0	0	0	0	0	0	6.13333e-07	0	0	0	0	0	0	0	0	0	-	-	-	-	-	-	-	-	-	-	-	-	-	-	-	-	-	-	-	-
Cotinine	0	0	0	0	0	0	0	0	0	0	4.1e-07	0	0	0	0	0	0	0	0	0.0193b	-	-	-	-	-	-	-	-	-	-	2.12435e-05	-	-	-	-	-	-	-	-
Caffeine	0	0	0	0	0	1.96e-06	0	7.33333e-06	0	0	1.96667e-06	0	0	0	0	0	0	6.53333e-06	0	-	-	-	-	-	-	-	-	-	-	-	-	-	-	-	-	-	-	-	-
Sucralose	0	0	0	0	0	3.63333e-05	0	0	0	0	0	0	0	0	0	0	0	0	0	-	-	-	-	-	-	-	-	-	-	-	-	-	-	-	-	-	-	-	-
Isophorone	0	0	0	0	0	3.01333e-06	0	0	0	2.53e-05	1.14333e-05	0	0	0	0	0.000141667	0	0	0	-	-	-	-	-	-	-	-	-	-	-	-	-	-	-	-	-	-	-	-
Benzyl alcohol	2.59e-07	0	0	0	0	0	0	0	0	3.73333e-06	0	0	0	0	0	0	0	0	0	0.1c	2.59e-06	-	-	-	-	-	-	-	-	3.73333e-05	-	-	-	-	-	-	-	-	-
N-Nitrosomorpholine	0	0	0	0	0	0	0	0	0	0	0	6.26667e-07	0	0	0	0	0	0	0	-	-	-	-	-	-	-	-	-	-	-	-	-	-	-	-	-	-	-	-
e-Caprolactam	0	0	0	0	0	0	0	0	1.28e-06	0	0	0	0	0	0	0	0	0	0	0.5d	-	-	-	-	-	-	-	-	2.56e-06	-	-	-	-	-	-	-	-	-	-
n-Butylacrylate	8.66667e-05	1.48e-06	4.7e-06	1.06667e-06	0	6.56667e-06	0	5.7e-06	0	3.96667e-06	0	0	0	0	9.2e-06	0	0	1.20333e-06	0	-	-	-	-	-	-	-	-	-	-	-	-	-	-	-	-	-	-	-	-
2-Naphthol	0	0	0	0	0	0	0	0	0	6.3e-07	0	0	0	0	0	0	0	0	0	-	-	-	-	-	-	-	-	-	-	-	-	-	-	-	-	-	-	-	-
Nitrobenzene	0	0	0	2.47667e-07	0	0	0	0	0	0	0	0	0	0	0	0	0	0	0	0.002d	-	-	-	0.000123833	-	-	-	-	-	-	-	-	-	-	-	-	-	-	-
N,N-Dicyclohexylurea	0	0	0	0	0	0	0	0	0	0	6.5e-06	0	0	0	0	0	0	0	0	0.0171b	-	-	-	-	-	-	-	-	-	-	0.000380117	-	-	-	-	-	-	-	-
1H-Benzotriazole	0	0	0	0	0	0	0	0	0	0	1.48333e-06	0	0	0	0	0	0	0	0	0.0127b	-	-	-	-	-	-	-	-	-	-	0.000116798	-	-	-	-	-	-	-	-
Melamine	0	0	0	0	0	0	0	0	0	0	0	0	0	0	0	0	6.16667e-06	0	0	-	-	-	-	-	-	-	-	-	-	-	-	-	-	-	-	-	-	-	-
Pentamethylbenzene	3.30333e-06	0	0	0	0	3.43333e-06	0	7.13333e-07	0	4.4e-06	3.11333e-06	0	0	0	5.43333e-07	3.17e-06	0	6.03333e-07	0	-	-	-	-	-	-	-	-	-	-	-	-	-	-	-	-	-	-	-	-
Total	0.000170345	6.7e-06	4.5701e-05	9.90193e-06	1.817e-05	5.90975e-05	8.25717e-05	9.35663e-05	8.61437e-05	0.000183944	8.15057e-05	4.20197e-05	1.9357e-05	3.35093e-05	0.00037294	0.00015541	1.9115e-05	2.0561e-05	1.14677e-05		7.23048e-06	4.46667e-06	0.000229406	0.000202643	2.25936e-05	2.0586e-05	0.000401567	1.69194e-05	0.000986055	0.000332132	0.00142985	7.40772e-05	9.89286e-05	6.2381e-05	0.00341267	5.12381e-06	0.000124904	4.90031e-05	2.15745e-05
Notes:
a The RfD value was calculated with no observed adverse effect level (NOAEL) and lowest observed adverse effect level (LOAEL) by (Li et al. 2020)
b The RfD value was predicted from the quantitative structure and activety relationship (QSAR) model with the CTV software (Wignall et al. 2018).
c From US The Risk Assessment Information System (RAIS) (RAIS 2024)
d From US EPA Integrated Risk Information System (IRIS) (IRIS 2025)
—: RfD could not be obtained.
IRIS (2025). US EPA Integrated Risk Information System (IRIS). US Environmental Protection Agency (USEPA)
Li, X., Tian, T., Shang, X., Zhang, R., Xie, H., Wang, X., et al. (2020). Occurrence and health risks of organic micro-pollutants and metals in groundwater of Chinese rural areas. Environmental Health Perspectives, 128(10), 107010. https://doi.org/10.1289/EHP6483
Rais, U. S. (2024). The risk assessment information system. US Environmental Protection Agency (USEPA)
Wignall, J. A., Muratov, E., Sedykh, A., Guyton, K. Z., Tropsha, A., Rusyn, I., & Chiu, W. A. (2018). Conditional toxicity value (CTV) predictor: An in silico approach for generating quantitative risk estimates for chemicals. Environmental Health Perspectives, 126(5), 057008. https://doi.org/10.1289/EHP2998

[truncated: 1 more sheets: Fig. S1]
